# Supplementary material
Source: MDPI journal article supplement (https://www.mdpi.com/2220-9964/10/9/630)

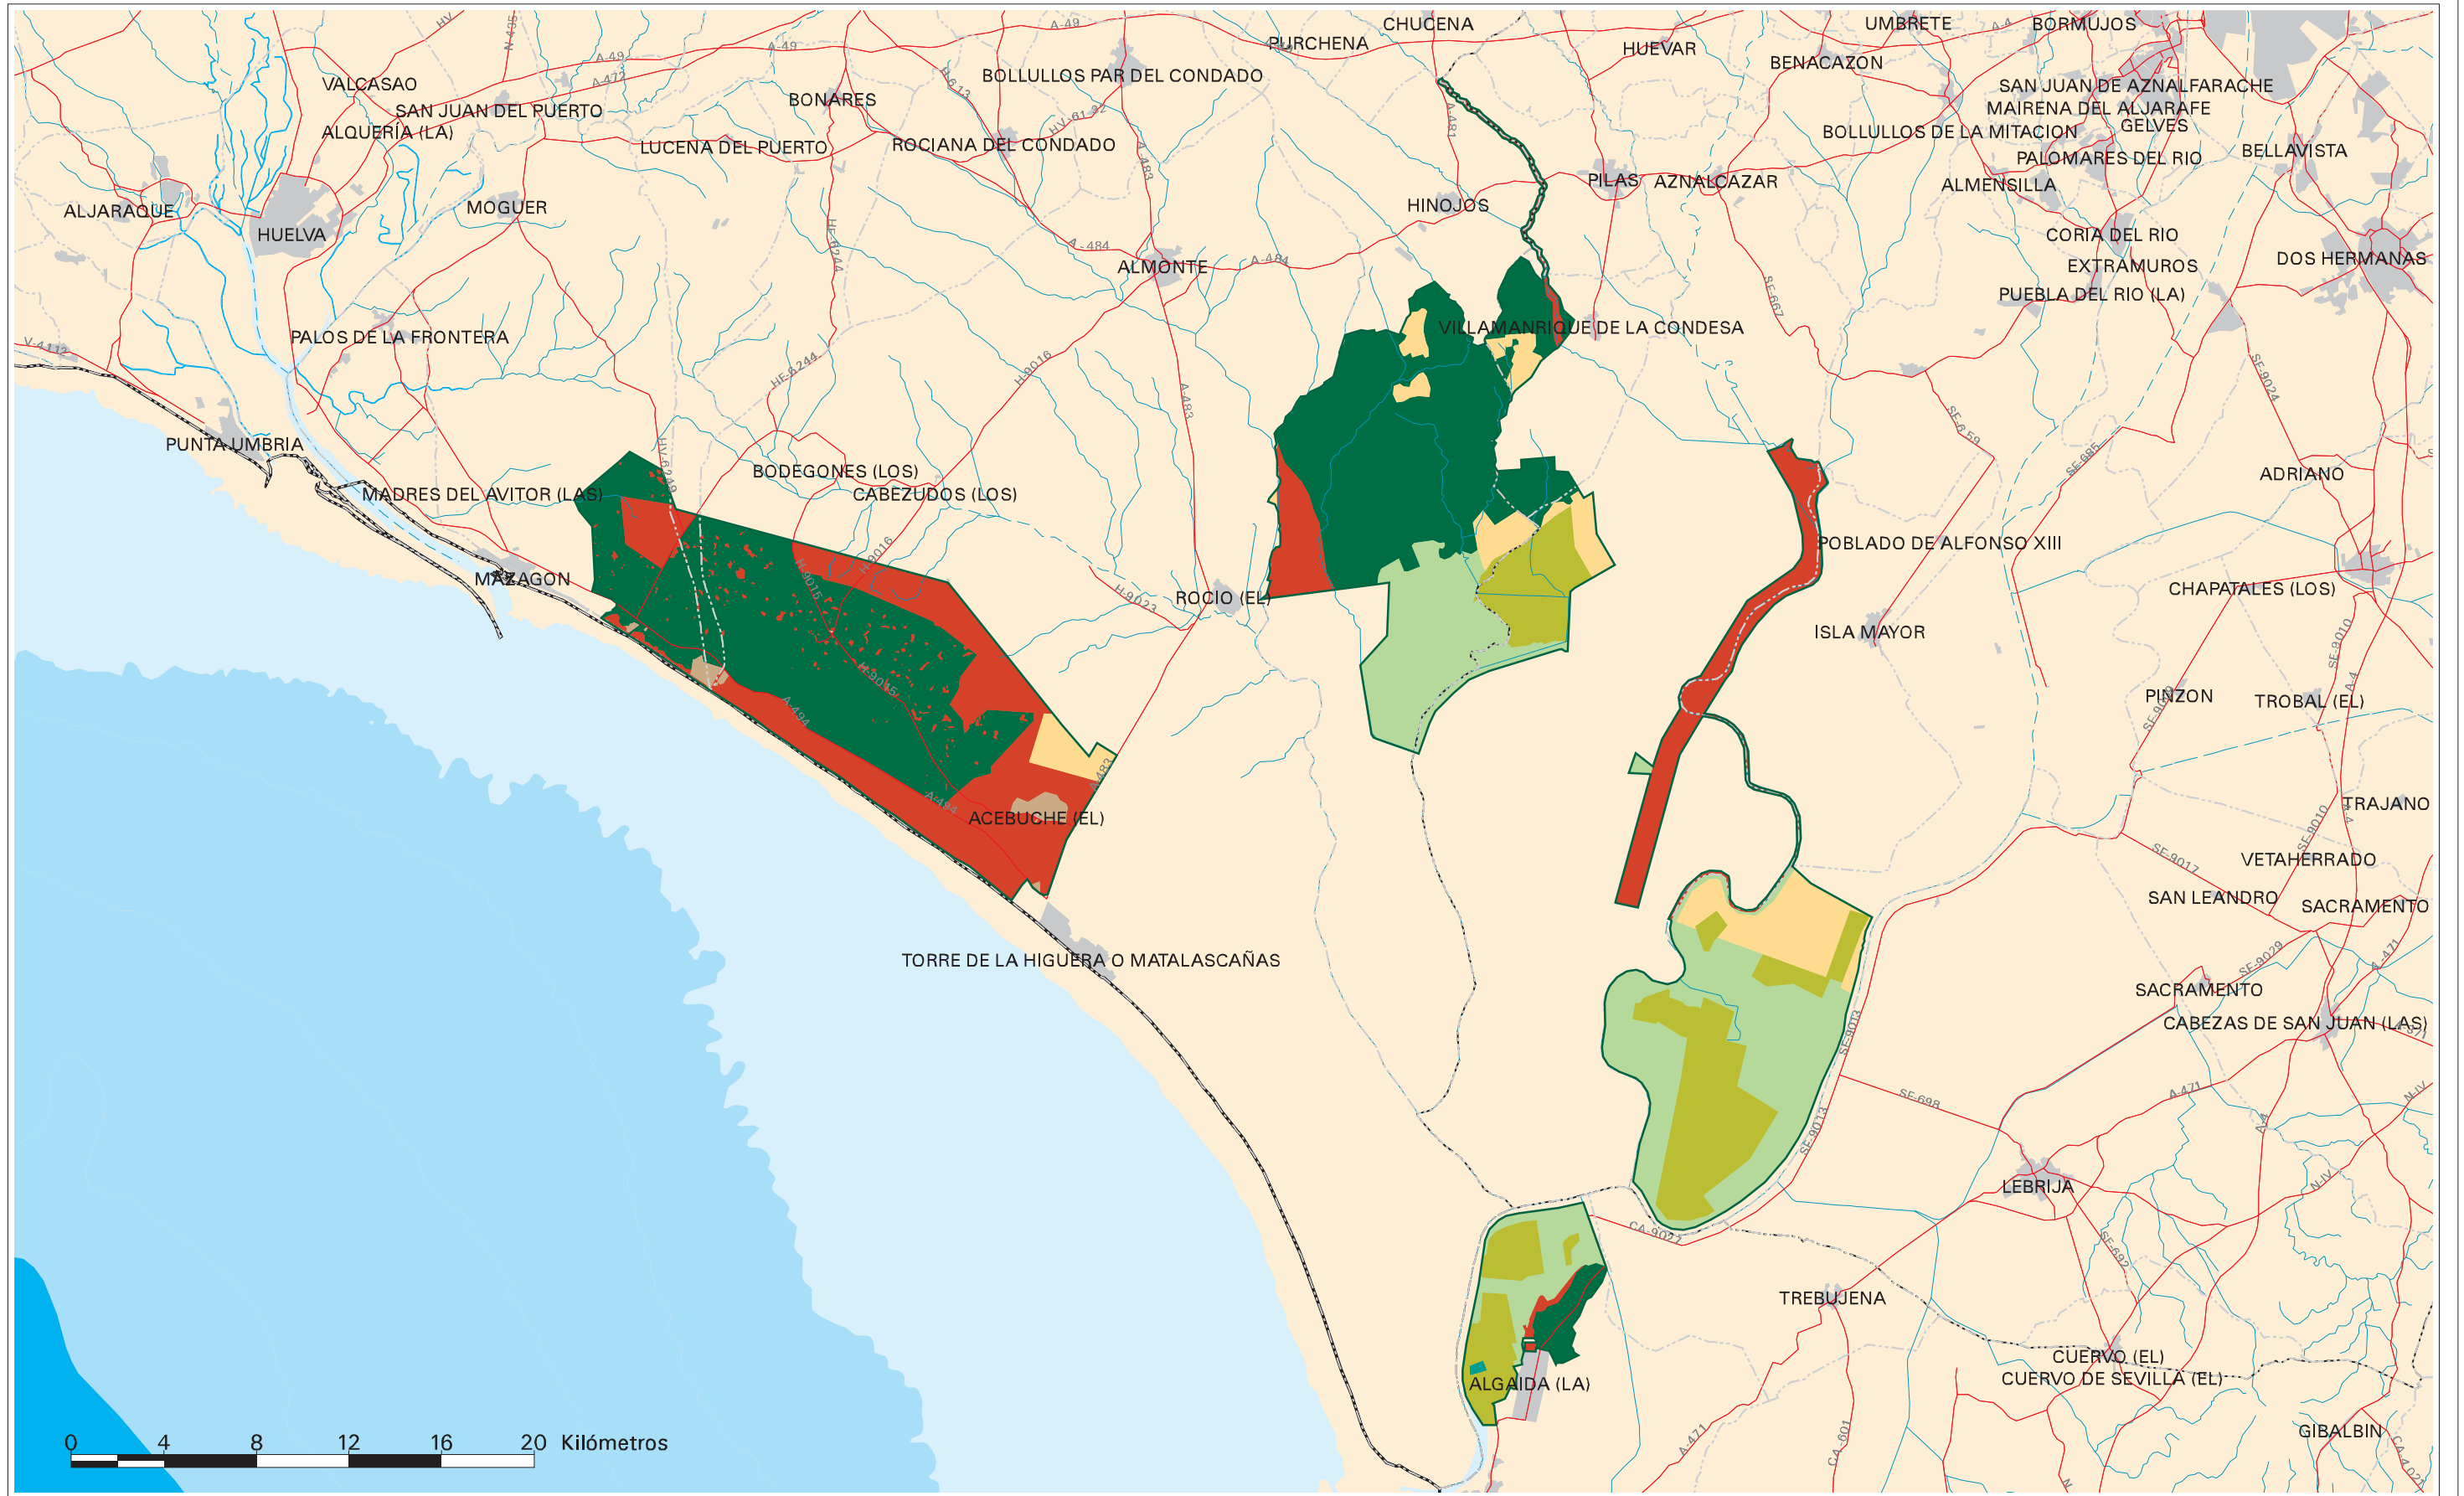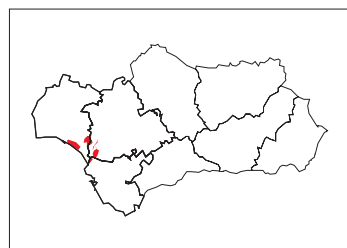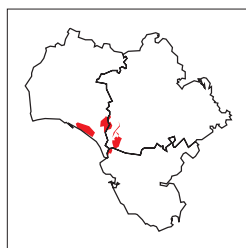

Leyenda

A. Zonas de reserva

ZONAS DE REGULACIÓN ESPECIAL

B1. Terrenos de monte

B2. Marisma no explotada

B3. Marisma explotada

ZONAS DE REGULACIÓN COMÚN

C1. Cultivos agrícolas

C2. Áreas con edificaciones

C3. Explotación acuícola intensiva

Plan de Ordenación de los Recursos Naturales  
del Parque Natural de Doñana

Zonificación  
(Cartografía de síntesis)

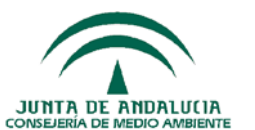

Supplement: s1 [file s1]
