# Supplementary material
Source: MDPI journal article supplement (https://www.mdpi.com/2220-9964/10/9/630)
Supplement: s1 [file s1]

## ANEXO I

### PLAN DE ORDENACIÓN DE LOS RECURSOS NATURALES DEL PARQUE NATURAL DE DOÑANA

#### ÍNDICE

- 1. INTRODUCCIÓN**
- 2. CARACTERIZACIÓN Y DIAGNÓSTICO**
  - 2.1. LOCALIZACIÓN
  - 2.2. PROCESOS EN EL MEDIO NATURAL
  - 2.3. VEGETACIÓN Y FLORA
  - 2.4. HÁBITATS Y ESPECIES DE INTERÉS COMUNITARIO
  - 2.5. FAUNA
  - 2.6. APROVECHAMIENTO DE LOS RECURSOS NATURALES
  - 2.7. DEMOGRAFÍA Y ACTIVIDAD ECONÓMICA
  - 2.8. URBANISMO
  - 2.9. INFRAESTRUCTURAS
  - 2.10. TURISMO EN EL MEDIO RURAL, TURISMO ACTIVO Y USO PÚBLICO
  - 2.11. PATRIMONIO CULTURAL
- 3. OBJETIVOS**
- 4. PROPUESTA DE ORDENACIÓN Y ZONIFICACIÓN**
  - 4.1. CRITERIOS Y DIRECTRICES GENERALES PARA LA ORDENACIÓN DEL ESPACIO
  - 4.2. ZONIFICACIÓN
- 5. NORMATIVA**
  - 5.1. VIGENCIA, ADECUACIÓN Y EVALUACIÓN
  - 5.2. RÉGIMEN DE PREVENCIÓN AMBIENTAL
  - 5.3. NORMAS GENERALES
  - 5.4. NORMAS PARTICULARES
- 6. CRITERIOS DE APLICACIÓN**
- 7. INDICADORES**
  - 7.1. CONSERVACIÓN DE RECURSOS NATURALES
  - 7.2. APROVECHAMIENTO SOSTENIBLE DE LOS RECURSOS
  - 7.3. USO PÚBLICO
  - 7.4. INVESTIGACIÓN
  - 7.5. PARTICIPACIÓN SOCIAL E INSTITUCIONES

## 8. CARTOGRAFÍA DE ORDENACIÓN

## 1. INTRODUCCIÓN

El presente Plan de Ordenación de los Recursos Naturales de Doñana se ha elaborado teniendo en cuenta varias premisas básicas. En primer lugar, se ha partido de una exhaustiva revisión de los contenidos y la estructura del Plan anterior y del análisis de los resultados de su aplicación. De esta forma el Plan ahora aprobado viene, de una parte, a consolidar el modelo de ordenación ya establecido en el plan anterior y, de otra, a corregir aquellas carencias e incoherencias detectadas en el mismo.

En segundo lugar, y teniendo como referencia el Plan anterior, se han considerado las nuevas circunstancias ambientales y socioeconómicas que caracterizan al espacio, así como el nuevo marco normativo y directrices políticas que, en materia de medio ambiente, se vienen desarrollando en el ámbito internacional y en el de la Unión Europea.

Por otra parte, se ha trabajado con el pleno convencimiento de que la ordenación de Doñana no puede entenderse desde la conservación de pequeñas porciones del territorio desconectadas entre sí, sino que es necesaria una ordenación que integre el Parque Natural en su contexto, considerando las diferentes escalas espaciales y temporales a las que se manifiestan los procesos ecológicos que están en la base de su funcionamiento. En este sentido, el Plan de Ordenación del Territorio de Andalucía (POTA) es el marco de referencia general para los demás planes y actuaciones públicas con incidencia territorial y, en Doñana, se desarrolla en el Plan de Ordenación del Territorio del Ámbito de Doñana (POTAD), Decreto 341/2003, de 9 de diciembre, y está directamente relacionado con los instrumentos de planificación de los espacios naturales.

Por último, se ha procurado que sea un documento consensuado por los diferentes sectores sociales e institucionales implicados, por lo que se ha propiciado, ya desde su fase de elaboración, el debate y participación social, a fin de concitar en torno al mismo el mayor grado de adhesión posible.

Respecto a su contenido, el presente Plan se ajusta a lo establecido en el artículo 4, apartado cuarto de la Ley 4/1989, de 27 de marzo y se estructura en los siguientes apartados:

1. Introducción.
2. Caracterización y Diagnóstico.
3. Objetivos.
4. Propuesta de Ordenación y Zonificación.
5. Normativa.
6. Criterios de aplicación.
7. Indicadores.
8. Cartografía de Ordenación.

## 2. CARACTERIZACIÓN Y DIAGNÓSTICO

### 2.1. LOCALIZACIÓN

El ámbito territorial del presente Plan se corresponde con los límites del Parque Natural de Doñana, definidos en el Anexo III del Decreto por el que se aprueba el presente Plan.

Situado en el suroeste de la península, el Parque Natural de Doñana tiene una superficie de 53.835 ha, repartidas entre las provincias de Huelva (Almonte, Hinojos, Lucena del Puerto, Moguer y Palos de la Frontera), Sevilla (Aznalcázar, Isla Mayor, Pilas, La Puebla del Río y Villamanrique de la Condesa) y Cádiz (Sanlúcar de Barrameda). Se extiende en cuatro sectores discontinuos alrededor del Parque Nacional, incluyendo principalmente zonas de marisma en diferente grado de transformación, así como una importante representación de formaciones forestales y complejos lagunares. Aunque en el momento de su declaración fue concebido como una zona de amortiguación alrededor del Parque Nacional, su importancia ecológica es muy notable y justifica por sí misma su protección.

Figura 1. Localización del Parque Natural  
(Ver anexo cartográfico en [www.juntadeandalucia.es/medioambiente](http://www.juntadeandalucia.es/medioambiente))

### 2.2. PROCESOS EN EL MEDIO NATURAL

El Parque Natural de Doñana forma parte de una entidad funcional superior, que es el gran ecosistema litoral de Doñana. Este constituye uno de los complejos fluviolitorales más importantes de la Unión Europea. Con una superficie original de unos 2.155 km<sup>2</sup>, engloba un espacio de límites con significado ecológico, cuya génesis y evolución geomorfológica está íntimamente ligada a la dinámica del litoral Abalario-Doñana; es decir, un territorio vinculado directa o indirectamente con la presencia del río y del mar.

Está formado por tres ecodistritos o sistemas de rango menor. El ecodistrito eólico corresponde a uno de los mantos eólicos litorales más importantes de Europa (453 km<sup>2</sup>), formado por dunas activas, semiestables y fitoestables. El ecodistrito costero (52 km<sup>2</sup>) está formado por la flecha litoral de Las Marismillas, junto con playas antiguas y actuales. Por último, el ecodistrito más extenso (1.650 km<sup>2</sup>) es la marisma fluvio/marina interna y externa de limos y arcillas resultado del relleno del antiguo estuario del Guadalquivir.

El mantenimiento de la integridad ecológica de este gran ecosistema necesita de la conservación de la integridad hidrológica (sistema de flujos de agua superficial y subterránea, pulsos hidrológicos) de sus hidrosistemas de referencia. Para la marisma de Doñana el hidrosistema de referencia es el cauce del Bajo Guadalquivir, junto a la cuenca del río Guadiamar y otras cuencas menores (fundamentalmente las de la

Rocina, Partido y Cañada Mayor), mientras que para los ecodistritos eólico y costero es el Sistema Hidrogeológico de Doñana.

El gran ecosistema de Doñana y sus hidrosistemas de referencia constituyen una unidad funcional de observación, análisis y gestión, en la que los Parques Nacional y Natural son unidades administrativas.

### 2.2.1. PROCESOS CLIMÁTICOS

El clima del ámbito de Doñana es mediterráneo subhúmedo, caracterizándose por una acusada sequía estival que se extiende desde el mes de junio a septiembre, y un régimen pluviométrico moderado, con un total pluviométrico medio del orden de los 500 a 600 milímetros, muy irregular en el reparto de las precipitaciones anuales e interanuales.

Térmicamente destaca por los inviernos suaves, en buena medida debido a la cercanía al mar, y por veranos muy calurosos. Los vientos dominantes son las brisas y los ponientes y levantes; se les suman, durante el estío, los vientos del Suroeste.

Las características climáticas condicionan el desarrollo de los procesos ecológicos fundamentales y las actividades antrópicas. En este sentido, hay que señalar la desecación de la marisma en el estío. Esta desecación se extiende a la mayor parte de las lagunas y zonas húmedas; sólo algunas mantienen su lámina de agua durante todo el año. También se produce un descenso considerable de los cursos de agua superficiales, que dependen durante estos momentos de los aportes de agua del acuífero subterráneo. La artificialización de la red de drenaje superficial, que se viene produciendo desde tiempos históricos, ha ocasionado una mayor dependencia de las precipitaciones, tanto en el sistema natural en su conjunto como en los espacios marismenos en particular.

### 2.2.2. DINÁMICA GEOMORFOLÓGICA

A escala regional, el territorio del Parque Natural de Doñana se incluye en la unidad fisiográfica geotectónica de la depresión o cuenca inferior del Guadalquivir, que geográficamente queda enmarcada al norte por el zócalo hercínico de Sierra Morena, por las cordilleras Béticas al sureste y abierta al mar por el sur.

En líneas generales, predominan una serie de formaciones cuaternarias, continentales y marinas, que culminan el relleno de la cuenca sedimentaria terciaria. Dichas formaciones se desarrollan en la margen septentrional sobre materiales detríticos de carácter marino, fundamentalmente neógeno, mientras que en la margen meridional la base la constituyen materiales para autóctonos de naturaleza arcillosa.

Los materiales que conforman las zonas de arenas y marismas de Doñana proceden de los procesos de desmantelamiento y erosión de los núcleos montañosos que enmarcan la depresión terciaria. Por consiguiente, la génesis del territorio se explica en términos generales por los procesos de colmatación de la gran depresión del Guadalquivir a partir de los aportes sedimentarios procedentes de los diferentes relieves circundantes.

Los procesos geomorfológicos de carácter aluvial son muy importantes en el funcionamiento de los ecosistemas de Doñana, actuando la mayoría a escalas más amplias que las definidas por los límites del Parque Natural. Estos procesos se han visto acelerados en las últimas décadas debido a las tensiones originadas en su periferia por un inadecuado manejo de las cuencas y los cauces.

Los procesos de erosión y desalojo de materiales hacia la marisma se han visto incrementados con la puesta en cultivo de terrenos forestales, sobre todo para fresa y fresón, y la retirada de plantaciones de eucalipto. Esta expansión agrícola ha tenido lugar casi en su totalidad fuera de los límites del Parque Natural de Doñana, afectando principalmente a las cuencas altas de los arroyos del Partido y La Rocina, así como a otras cuencas menores que drenan a la marisma del Guadalquivir.

Los materiales erosionados se depositan en buena medida en el Parque Natural, pero también en terrenos del Parque Nacional. Dentro del Parque Natural, el Sector Norte es el espacio más afectado por estos procesos de sedimentación, incluyendo tanto cauces como zonas de marisma y ecotono. Destaca el caso del Arroyo del Partido: originalmente, los sedimentos arrastrados por este sistema fluvial se distribuían en una amplia llanura aluvial por debajo de la Casa de la Matanza, pero la rectificación y encauzamiento del último tramo del arroyo ha derivado en un incremento de la velocidad del agua y por tanto de la capacidad de erosión y transporte. Como consecuencia, la superficie y ubicación del cono aluvial del Arroyo del Partido ha experimentado un desplazamiento hacia las marismas y un crecimiento notable en las últimas décadas, pasando de una superficie de 32 ha en 1983 a más de 300 ha en la actualidad.

Los procesos morfodinámicos litorales del área de Doñana son muy activos, destacando los modelados erosivos en parte de los acantilados costeros del Parque Natural (Médano del Asperillo), y las formas de acumulación en la contraflecha litoral de La Algaida y el cuerpo principal de la flecha litoral de Doñana; en este último sector también vienen registrándose procesos erosivos con pérdida de sedimentos en las playas durante las últimas décadas.

Las numerosas obras de infraestructura realizadas en el entorno litoral regional, “aguas arriba” según la deriva del oeste que afecta a todo el sector, han determinado un aumento significativo de la dinámica erosiva, cuya manifestación más clara ha sido la regresión de las formaciones arenosas litorales existentes entre los núcleos de Mazagón y Matalascañas. Los ámbitos donde la erosión se ha estimado más intensa son las playas altas, prácticamente desaparecidas, así como los acantilados del Médano del Asperillo, en retroceso por la zapa de la base de los mismos ejercida por la acción del oleaje durante los temporales.

### 2.2.3. EDAFOLOGÍA

La formación y desarrollo de los suelos ha venido realizándose de manera paralela a la consolidación de los procesos sedimentarios, por lo que se trata, en la práctica totalidad de los casos, de suelos muy poco evolucionados cuya edafogénesis ha sido muy simple.

La cubierta edáfica está representada por dos tipologías diferentes: arenosa y arcilloso-salina.

Los suelos arenosos predominan en los Sectores Norte y Oeste, contando también con una presencia significativa en el Sector Sur. Son suelos pobres en materia orgánica, poco fértiles.

Por otro lado se encuentran los arcillosos-salinos, característicos de las zonas de marisma. Son suelos escasamente evolucionados, con elevados contenidos en sales y cuya vocación es la de pastizal.

Los factores de riesgo para la conservación de los suelos tienen en general escasa incidencia en el Parque Natural, y se deben principalmente a la aplicación de abonos y fitosanitarios en las actividades agrícolas, y a la contaminación de la cubierta edáfica en el Sector Este, por metales pesados de origen minero.

### 2.2.4. PROCESOS HIDROLÓGICOS

Los recursos hídricos, incluyendo las aguas superficiales y subterráneas, son un factor clave en este espacio protegido, ya que constituyen la base estratégica del mantenimiento de los ecosistemas en general, y en particular de los ambientes marismesños, los sistemas lagunares y los arroyos fluviales.

#### A. Hidrología subterránea

El Parque Natural se encuentra enclavado en la Unidad Hidrogeológica Almonte-Marismas (Unidad Hidrogeológica 05-51-04-14), a excepción del Sector Sur, en la provincia de Cádiz, que pertenece a la unidad hidrogeológica de Sanlúcar-Rota-Chipiona.

El funcionamiento hidrogeológico de Doñana se ve alterado fundamentalmente por las intensas extracciones de agua localizadas en puntos muy sensibles, dando lugar a marcados descensos locales del acuífero. Más allá de los desequilibrios anuales, que podrían eventualmente ser compensados de un año a otro por variaciones en la recarga debidas a la alternancia de años húmedos y secos, lo importante es que el desequilibrio se ha mantenido de forma interanual durante más de una quincena de años. El resultado final es un descenso no sólo de los niveles piezométricos profundos sino también de los niveles freáticos.

Esta situación se ve acentuada por el hecho de que la concentración de los bombeos cuantitativamente más voluminosos ocurre en las áreas de descarga natural del acuífero (entorno de La Rocina y antiguo ecotono NE -Villamanrique, Aznalcázar). Esto ha contribuido a la disminución de la descarga natural de agua subterránea en estas zonas, ya que una buena parte de ese agua se saca ahora mediante pozos, en general lo bastante profundos como para interceptar líneas de flujo de agua subterránea de distinta profundidad y longitud de recorrido. Esto ha ocasionado la desaparición de muchos manantiales y rezumes, la disminución de la descarga a arroyos -especialmente en el ecotono N-, la pérdida de la surgencia natural de pozos profundos, y una disminución de la descarga vertical ascendente de agua dulce subterránea a través de las arcillas de marisma.

La disminución del nivel freático supone un alejamiento del agua del alcance de las raíces, la reducción de la frecuencia de inundación de las cubetas y favorece la infiltración del agua de recarga hacia los niveles más profundos del terreno, debido al incremento del gradiente hidráulico vertical. Afecta directamente a los ecosistemas ligados a la presencia de agua subterránea aflorante o muy próxima a la superficie, especialmente las lagunas del manto eólico y los arroyos que drenan la vertiente norte del Abalarío, así como bajos y manaderos, que hacen de cabecera del importante sistema de cañadas de éste último sector.

La mayor parte de las extracciones de agua se realizan para uso agrario, en su mayoría fuera de los límites del Parque Natural, y para usos turísticos en Matalascañas. En el Sector Norte es donde el descenso del nivel freático resulta más acusado. Se ha detectado también contaminación salina del acuífero por intrusión marina en las áreas costeras.

### *B. Hidrología superficial*

Desde el punto de vista hidrológico, se pueden diferenciar, por su distinto funcionamiento, la red de drenaje superficial y los complejos lagunares.

La red de drenaje se compone de un complejo entramado de arroyos, cañadas, caños y surgencias. Los principales cauces del entorno del Parque Natural son:

- Arroyo de Pilas: conforma el límite más septentrional del Parque Natural y drena una cuenca de 162'5 km<sup>2</sup>. Su caudal es muy irregular, aunque mantiene un cierto flujo circulante en el verano. Constituía uno de los cursos que aportaban agua a la marisma antes de modificarse su trazado. Actualmente el tramo final del arroyo desagua directamente, mediante un canal, en el encauzamiento de Entremuros.
- Arroyo del Partido: recoge las aportaciones de 308 km<sup>2</sup>, en una cuenca con graves problemas de erosión, transporte y sedimentación de arenas debido principalmente a las transformaciones agrícolas. Originariamente las aportaciones de este arroyo se expandían en una amplia llanura aluvial antes de llegar a la marisma. Como consecuencia de su canalización se está formando un importante cono de sedimentación en la marisma.
- Caño Guadiamar: actualmente es un caño muy transformado y sólo permanece el último tramo antes de entrar en la marisma del Parque Nacional.

- Caño Travieso: caño desdoblado del río Guadiamar (sector de Entremuros), que realizaba un gran aporte de agua de origen pluvial a la marisma y tenía una importante función de distribución de aguas salobres a partir del Brazo de la Torre. En la actualidad se encuentra cortado y prácticamente desaparecido por la desecación y puesta en cultivo de su tramo de desagüe en la marisma.
- Brazo de la Torre: debido a las sucesivas transformaciones realizadas, ha sufrido una colmatación intensa, quedando reducido a un cauce somero, colonizado por cañaveral en su parte alta. El tramo del Brazo de la Torre situado al este del dique izquierdo de Entremuros, entre la Vuelta de la Arena y la Vuelta del Matochal, es actualmente un cauce por el que no fluye el agua procedente del Guadiamar, que es encauzada en el Canal de Aguas Mínimas. Las aguas mareales sólo tienen influencia en los últimos cinco kilómetros del Brazo, coincidentes con la Vuelta del Matochal.

Antes de su transformación, el sistema hidrológico superficial estaba determinado por las aportaciones de agua dulce del Arroyo de La Rocina (y otros menores), y las aportaciones de los brazos en los que se desdoblaba el río Guadiamar en las avenidas, que constituían más de la mitad de las aportaciones. El excedente de estos aportes se evacuaba al río Guadalquivir a través de caños naturales en las escotaduras del levée entre el río y la marisma.

Actualmente, después de una época de intensa transformación de la marisma y de algunos de sus principales colectores, la mayor parte de los aportes de origen fluvial se han reducido drásticamente por el norte (Rocina, Partido, Cañada Mayor), debido al desvío de caudales superficiales y a la disminución de la descarga del acuífero a los cauces por el descenso de los niveles piezométricos en el entorno de la marisma. Como consecuencia, el periodo en que la marisma se encuentra inundada depende en mayor medida del régimen de precipitaciones. En este contexto toman especial relevancia los ciclos de sequía y años húmedos que caracterizan al clima de la zona.

Dependiendo del balance precipitación/evaporación, el periodo de almacenamiento de agua es de 6 meses (de octubre a marzo), el de retención de 2 meses (marzo a mayo) y a partir de entonces el balance precipitación/evaporación es negativo y la marisma va perdiendo agua hasta su desecación. Este dinamismo estacional va acompañado de un marcado dinamismo fisicoquímico.

La alteración del régimen hidrológico desencadena la regresión de comunidades ligadas a los cauces, y las alteraciones en el régimen de inundación de la marisma tienen como consecuencia la regresión de las comunidades de macrófitos acuáticos poco tolerantes a la salinidad.

En el entorno del Parque Natural, la mayor parte de la marisma se encuentra transformada. Las actuaciones más recientes en la marisma van dirigidas a su restauración. En el marco del proyecto "Doñana 2005" se ha restaurado la Marisma Gallega en el Parque Natural. Por su parte, en el marco del proyecto del Corredor Verde del Guadiamar se ha realizado la restauración ecológica de la marisma de Entremuros incluida en el Parque Natural. Además, el Ministerio de Medio Ambiente ha restaurado parte de la marisma mareal del Sector Sur, en concreto 52 ha de marismas de La Algaida.

En cuanto a los complejos lagunares, la mayor parte se concentran en el Sector Oeste, entre la Línea de la Mediana y el frente dunar secundario de la Línea del Abalarío. Destacan en este sector el complejo palustre de las lagunas de Ribetehilos y del Peladillo, de eminente funcionamiento hipogénico, y el conjunto de lagunas de El Abalarío, donde pueden diferenciarse tres tipos de lagunas: hipogénicas (su alimentación procede principalmente de agua subterránea), epigénicas (su alimentación se produce principalmente por agua meteórica y de escorrentía y su funcionamiento es independiente del nivel freático) y lagunas de funcionamiento mixto.



Ambos complejos palustres, así como el correspondiente a las lagunas de Moguer y Pino Galé, más al oeste, se vieron muy afectados por las repoblaciones con eucalipto realizadas desde los años 50, con la ocupación de las cubetas de multitud de lagunas y la pérdida de su funcionalidad original, y por las extracciones intensivas de agua subterránea en los sectores de Mazagón-Moguer y el Sector II del Plan Regable Almonte-Marismas, dada su dependencia del nivel freático.

Desde hace una década la Consejería de Medio Ambiente ha ejecutado varios proyectos, como el de recuperación ecológica del Complejo Palustre de El Abalarío, y diversos planes con los que han sido eliminadas las plantaciones de eucaliptos tanto en los vasos lagunares como en el resto de la zona, y se han sustituido por otras especies, dando como resultado la recuperación de la funcionalidad de los complejos lagunares.

Los principales problemas y factores de riesgo para la conservación de las aguas superficiales se relacionan con episodios contaminantes de origen diverso:

- La rotura de la balsa minera de Aznalcóllar en 1998 y el consiguiente vertido de lodos por el cauce del Guadiamar no sólo produjo contaminación edáfica, sino también contaminación de las aguas superficiales por metales pesados, afectando al Sector Este, en el Brazo de la Torre. Tras el incidente, las medidas adoptadas para la recuperación de la zona afectada, como la retirada de lodos y la aplicación de diversas técnicas de descontaminación, han permitido que en la actualidad los diferentes análisis y muestreos realizados revelen que la concentración de los contaminantes ha vuelto a valores considerados normales.
- Los cultivos agrícolas también han sido una fuente de contaminación debido a los productos usados para la mejora de la producción, situación que se ve reducida, sensiblemente, mediante la aplicación de medidas agroambientales.
- La contaminación de origen industrial (alpechines, vinazas, purines) se localiza en el entorno de las poblaciones donde se realizan estas actividades.
- La contaminación de origen urbano (aguas negras no depuradas y vertidas a cauces y fosas sépticas), se asocia a aquellos núcleos que presentan deficiencias en la depuración de las aguas residuales.

#### 2.2.5. PAISAJE

La variedad y los contrastes son características clave del paisaje de este espacio protegido, dunas, matorrales, marismas, pinares se suceden en pocos kilómetros, creando un atractivo escenario en el que hay que destacar su horizontalidad y, por tanto, su fragilidad ante posibles impactos, en particular, la instalación de infraestructuras.

La gran diversidad biológica que alberga la comarca, la originalidad de sus procesos ecológicos y el interés de sus paisajes, radica en la coexistencia en un mismo territorio de ecosistemas contrastados, junto con un desarrollo socioeconómico que ha dejado su impronta marcada en el paisaje.

El paisaje es el resultado de la actividad humana ancestral sobre un territorio de características ecológicas singulares. Originalmente, en su modelado el aprovechamiento tradicional de los recursos naturales tuvo un papel esencial. Las prácticas utilizadas, las especies seleccionadas, los asentamientos, los modos de vida, eran parte integrante del paisaje. La roza, el fuego, la explotación del piñón, la madera y el carbón, la ganadería, la pesca y la agricultura eran los principales tipos de aprovechamientos.

Sin embargo, a partir de la primera mitad del siglo XX, la intensificación agrícola y forestal han tenido como consecuencia la pérdida de heterogeneidad paisajística, con la consiguiente disminución en la

diversidad de especies y hábitats, la eliminación de gran parte del patrimonio cultural y paisajístico, la pérdida de la tradición campesina, así como la escasez de elementos culturales tradicionales en el paisaje.

Durante gran parte del siglo XX, la marisma sufrió un importante proceso de transformación mediante la puesta en marcha de sucesivas desecaciones encaminadas a la producción agrícola intensiva. Como resultado de esta colonización, existen en el Parque Natural explotaciones agrícolas, zonas de arrozal y explotaciones acuícolas. Sin embargo, a las medidas de desecación y puesta en cultivo han sucedido otras actuaciones de sentido contrario, tendentes a recuperar la marisma.

En cuanto a los ecosistemas forestales que se desarrollan sobre los arenales, el paisaje actual del Abalario también es el resultado de la confluencia en este espacio de sucesivas actuaciones orientadas a la creación de una gran masa forestal que fijara el avance dunar y permitiera la producción de madera y papel.

La pérdida de valor del recurso introducido, junto con la aparición de nuevas políticas hace que, a partir de los años 80, se proceda a la sustitución de las masas de eucaliptal, la potenciación del pino piñonero, la regeneración de los complejos lagunares y la potenciación de una mayor diversidad de aprovechamientos.

Como resultado de este complejo proceso, el paisaje forestal del Parque Natural es una mezcla de elementos originales de gran valor y zonas forestales de origen artificial, en las que la elevada densidad de árboles introduce un carácter de artificialidad.

Por último, las áreas mejor conservadas de Doñana se encuentran rodeadas de espacios bastante transformados, lo que lleva a una falta de conectividad entre dichos núcleos con el Parque Nacional, así como a la necesidad de una conectividad a mayor escala que permita la conexión de las poblaciones de Doñana con otras más alejadas (Sierra Morena). A la falta de permeabilidad del paisaje se suma la presencia de elementos que actúan como barrera para la dispersión de muchas especies.

### **2.3. VEGETACIÓN Y FLORA**

Los diferentes ecosistemas presentes en el Parque Natural se pueden definir como unidades homogéneas a partir de su composición vegetal y su dinámica interna. Se encuentran asociados a los principales ámbitos existentes desde el punto de vista de su dinámica ecológica: arenales y marismas.

#### **2.3.1. PINARES**

Los pinares ocupan importantes extensiones de terreno del Parque Natural. En parte son consecuencia de la política repobladora llevada a cabo en los siglos XVIII y XIX, y actualmente continúan en expansión debido a las repoblaciones que tienen por objeto la sustitución de las masas de eucaliptales.

A mediados del siglo XX, años 40 y 50, tuvo lugar una intensa actividad repobladora en el Parque Natural, localizándose en los terrenos tradicionalmente conocidos como baldíos, dunas costeras y arenales del sector Oeste, cuya transformación respondía a fijar las dunas móviles litorales cuya movilidad se consideraba un peligro para los asentamientos y las actividades humanas y revalorizar las tierras.

Tras casi medio siglo, la sucesión del matorral ha regenerado una vegetación muy atractiva donde el pino ha sobrevivido en bosques que alternan con matorral y restos de la vegetación inicial y amplias zonas arenosas con suelo descubierto.

Estos bosques, cuya especie principal es el pino piñonero (*Pinus pinea*), se caracterizan por poseer un estrato arbóreo monoespecífico, alta densidad de pies/ha, buen estado vegetativo y abundante regenerado natural debido a su adaptación a los suelos arenosos.

Las masas maduras se presentan tanto como pinares “aislados”, cuyo mayor exponente es el pinar de La Algaida, como en masas interconectadas –pinares de Almonte e Hinojos–. En ambos casos, una de las características más sobresalientes es la corpulencia y gran porte que alcanzan, por la importancia que tiene para la acogida de poblaciones animales.

### 2.3.2. EUCALIPTALES

En la actualidad, y como consecuencia de las actuaciones realizadas, la superficie ocupada por eucaliptos se ha reducido considerablemente, hasta quedar relegados a pequeños bosquetes y ejemplares aislados.

Las masas todavía existentes se caracterizan por un estrato arbóreo dominado por el eucalipto, en ocasiones de gran altura y porte, y un sotobosque escasamente desarrollado.

### 2.3.3. DEHESAS

Las formaciones adehesadas, constituidas casi exclusivamente por alcornoque (*Quercus suber*) como especie dominante, se caracterizan por su escaso número y reducida extensión superficial. Se localizan en el Sector Norte, destacando los del término de Villamanrique de la Condesa, por ser los de mayor extensión. Además del alcornoque aparecen, con mucha menor frecuencia, ejemplares arbóreos de encina (*Quercus ilex* subsp. *rotundifolia*).

Desde el punto de vista estructural son formaciones que carecen de sotobosque en la mayor parte de los casos, debido al aprovechamiento al que han sido sometidas históricamente. La escasez de regenerado es el principal obstáculo para su conservación.

### 2.3.4. SABINAR

El sabinar es una formación dominada por la sabina (*Juniperus phoenicea* subsp. *turbinata*), en la que aparece un sotobosque más o menos desarrollado conformado por especies propias del matorral noble y otras especies típicas del matorral mediterráneo. Allí donde la formación resulta más abierta surge una comunidad de líquenes de gran interés, en la que merecen destacarse especies como *Cladonia mediterranea* y *Cladonia convulata*.

Actualmente la extensión del sabinar es muy reducida, debido a la intervención histórica del hombre, quedando restringido a las zonas de arenas basales del manto eólico, localizadas en el litoral del Parque Natural. Es en “El Asperillo”, concretamente, donde se encuentra la masa mejor conservada.

### 2.3.5. ENEBRAL

Es en el Asperillo donde se localizan los ejemplares de esta especie en el Parque Natural. En la actualidad, el enebro marítimo (*Juniperus oxycedrus* subsp. *macrocarpa*) no forma masas continuas, apareciendo pocos ejemplares por unidad de superficie. También se pueden encontrar individuos aislados formando parte de otras formaciones vegetales, tanto arbóreas como arbustivas.

Su importancia ecológica se debe a que constituyen comunidades relictas de formaciones vegetales que en el pasado ocuparon extensiones mayores.

### 2.3.6. BOSQUE DE RIBERA

Las formaciones riparias se localizan en los márgenes de los cursos fluviales, así como en las zonas favorables del ecotono de la Vera, y constituyen espacios de gran valor por la diversidad biológica que albergan.

De la variedad de especies que las componen destacan los sauces (*Salix atrocinerea*), fresnos (*Fraxinus angustifolia*) y álamos (*Populus alba*), así como un número notable de arbustos y

trepadoras, como la hiedra (*Hedera helix*), zarzaparrilla (*Smilax aspera*) y la zarza (*Rubus ulmifolius*).

### 2.3.7. MATORRALES

Los matorrales cubren alrededor del 15 % de la extensión del espacio protegido. Se pueden distinguir cinco tipos:

El denominado monte blanco es un matorral xerofítico constituido principalmente por jaguarzo (*Halimium halimifolium*), acompañado por diversas especies de labiadas y cistáceas. Representa la etapa de degradación avanzada de los ecosistemas mediterráneos secos.

El monte negro, formado por comunidades de tipo brezal en las que dominan *Erica scoparia*, *Stauracanthus genistoides* y *Ulex parviflorus*, es característico de los suelos deprimidos que sufren encharcamiento durante el invierno, y en general se encuentra en zonas bajas de gran humedad edáfica, relacionadas con descargas locales del acuífero.

Una formación vegetal ligada al monte negro lo constituye el monte noble, que se presenta en rodales muy densos. Aparece en zonas deprimidas y allí donde hay disponibilidad de agua surgente. Está constituido por especies como *Pistacia lentiscus*, *Phillyrea angustifolia* y *Myrtus communis*.

Por último, el denominado matorral del Médano, de gran valor ecológico y paisajístico, se localiza en las antiguas formaciones dunares del Sector Sur, en la parte más elevada de la zona de El Asperillo. Destacan las siguientes especies: *Corema album*, *Cistus salviifolius*, *Calluna vulgaris* y *Erica umbellata*.

### 2.3.8. PASTIZALES

Los pastizales, característicos de la zona de transición entre los arenales y la marisma, están representados por un pastizal eutrófico con manchas de juncal, monte negro y monte noble. Se localizan en la zona de la Vera, también conocida como Vera-Retuerta en las inmediaciones de Coto del Rey.

La composición de especies varía en función del sustrato sobre el que se desarrollan. Destacan especies como *Asphodellus fistulosus*, *Armeria velutina* en los suelos arenosos, *Hordeum marinum*, *Plantago coronopus* y *Trifolium resupinatum* en los suelos arcillo-arenosos que bordean los juncales y, en las áreas deprimidas de transición hacia la marisma, *Baldellia ranunculoides*.

También se pueden encontrar otros pastizales en las inmediaciones del Rocío, en zonas desprovistas de cubierta matorral o arbórea, compuestos por especies distintas al de la Vera, *Juncus maritimus*, *Juncus inflexus* y *Paspalum vaginatum* entre otras.

### 2.3.9. SISTEMAS LAGUNARES

Asociada a las láminas de agua de carácter efímero, surge una vegetación muy característica compuesta por herbáceas nitrófilas.

El sistema lagunar endorreico del Abalarío, formado principalmente por lagunas de carácter estacional, es el más importante del Parque Natural. Destaca también el complejo de Ribetehilos, cuya principal característica es el desarrollo de vegetación típica de turbera, conformada por un brezal higrófilo de *Erica ciliaris* y *Ulex minor* como especies más características.

### 2.3.10. MARISMA

Las formaciones ligadas a los medios acuáticos son, después de las formaciones de bosque, las

más importantes en cuanto a superficie.

Los distintos tipos de marisma, lucios, caños y salinas, presentan formaciones de herbáceas caracterizadas por el predominio de unas especies u otras en función del periodo de encharcamiento, profundidad de la lámina de agua y grado de salinidad de ésta.

La “marisma de almajos”, la más abundante en este espacio protegido, está constituida por marismas que, debido a su mayor cota, presentan escasa profundidad y periodos de encharcamiento cortos. Es característica en estas marismas una vegetación halófila dominada por quenopodiáceas crasas, muy resistentes a la salinidad edáfica, y algunas gramíneas.

La “marisma de castañuela”, representada en el Sector Norte, se ubica en zonas más deprimidas, permitiendo que los encharcamientos se dilaten más tanto en tiempo como en profundidad. Están colonizados por la castañuela (*Scirpus maritimus*), a la que acompañan otras especies que varían en función de la salinidad.

Los lucios, definidos como lagunas de gran extensión, deprimidas y de mayor profundidad que la marisma propiamente dicha, aparecen inundados durante prolongados periodos de tiempo. Presentan un sustrato limoso y aguas con un gran contenido en sales, en las que no aparece vegetación emergente. Los más importantes son el Lucio del Cangrejo y el de Isla Mayor.

Los caños son los antiguos brazos del río Guadalquivir y otros cauces menores que atravesaban la marisma y que en la actualidad están prácticamente colmatados. Cuando presentan vegetación, ésta está representada por el bayuncal, formación típica de las zonas más deprimidas de la marisma, en la que la especie dominante es *Scirpus litoralis*.

Las salinas se corresponden con suelos de marisma transformada, y sólo están presentes en el Sector Sur del Parque Natural, representadas por las Marismas de Bonanza. La vegetación característica es la halófila, adaptada a suelos muy salinos y de textura arcillosa.

El Parque Natural se caracteriza por que casi la mitad de su superficie está cubierta por formaciones en las que domina el estrato arbóreo, correspondiéndose la mayor parte de ellas con pinares de pino piñonero.

El resto de formaciones arbóreas o arbustivas, aún ocupando superficies menores, tienen gran importancia tanto desde el punto de vista de la diversidad, como por estar algunas de ellas en regresión o amenazadas: alcornocales adhesionados, sabinares, enebrales y bosques de ribera.

En este contexto, cobran especial relevancia los factores de riesgo que ponen en peligro la biodiversidad, la conservación de los bosques en general, y en particular aquellas formaciones menos abundantes pero de gran importancia ecológica.

En el caso de las formaciones ligadas a los medios acuáticos, los principales problemas están asociados a la regresión de comunidades vegetales ligadas a los cauces, por alteración del régimen hidrológico, así como a la regresión de especies y comunidades vegetales de elevados requerimientos hídricos y vinculadas a enclaves húmedos que se han visto afectados por el aumento de profundidad de los niveles freáticos, también merece mención la intensa actividad depredadora del cangrejo rojo americano.

Otra amenaza es la presencia de especies exóticas, tanto por la competencia con las especies autóctonas, como por los fenómenos de hibridación con las mismas. Es el caso de varias especies de eucalipto (*Eucalyptus* spp.) -para las que se han realizado diversas campañas de erradicación-, acacia (*Acacia* spp.), uña de león (*Carpobrotus edulis*), árbol del tabaco (*Nicotiana glauca*), etc.

Desde el punto de vista florístico, el Parque Natural es un área de gran interés para la conservación y mantenimiento de determinadas especies vegetales cuyas poblaciones son muy escasas, o su área de distribución muy restringida.

La mayoría de las especies singulares están asociadas a la colonización de medios ricos en arenas, que en su mayoría se distribuyen por el Sector Oeste. También son importantes las ligadas a los medios de turbera en el complejo lagunar de Ribeteñilos o las dos especies de helechos que se pueden encontrar: helecho real (*Osmunda regalis*) y lengua de serpiente (*Ophioglossum vulgatum*).

En cuanto a las especies de flora amenazada del Parque Natural, destacan las que se encuentran recogidas en el Catálogo Andaluz de Especies Amenazadas creado en la Ley 8/2003, de 28 de octubre, de la flora y la fauna silvestre. (tabla 1)

Tabla 1. Especies recogidas en el Catálogo Andaluz de Especies Amenazadas (en peligro de extinción y vulnerables).

| ESPECIE                                      |                        | LEY 8/2003, de 28 de octubre |
|----------------------------------------------|------------------------|------------------------------|
| Nombre científico                            | Nombre común           |                              |
| <i>Linaria tursica</i>                       | -----                  | En peligro de extinción      |
| <i>Micropyropsis tuberosa</i>                | -----                  | En peligro de extinción      |
| <i>Armeria velutina</i>                      | Clavellina             | Vulnerable                   |
| <i>Thymus tomentosus</i>                     | -----                  | En peligro de extinción      |
| <i>Vulpia fontquerana</i>                    | -----                  | En peligro de extinción      |
| <i>Gaudinia hispanica</i>                    | -----                  | Vulnerable                   |
| <i>Thorella verticillato-inundata</i>        | -----                  | Vulnerable                   |
| <i>Juniperus oxycedrus subsp. macrocarpa</i> | Enebro marítimo        | En peligro de extinción      |
| <i>Loeflingia baetica</i>                    | -----                  | Vulnerable                   |
| <i>Corema album</i>                          | Camarina               | Vulnerable                   |
| <i>Frangula alnus subsp. baetica</i>         | Avellanillo o Arraclán | Vulnerable                   |

#### 2.4. HÁBITATS Y ESPECIES DE INTERÉS COMUNITARIO

Debido a la importante diversidad de aves existente en el Parque Natural, en octubre de 2002, fue designado Zona de Especial Protección para las Aves (ZEPA) en aplicación de la Directiva 79/409/CEE, de 2 de abril, *relativa a la conservación de las aves silvestres*, por ampliación de la ZEPA de Doñana, que hasta ese momento sólo incluía al Parque Nacional. Asimismo, y debido a la riqueza ecológica presente en cuanto a especies y hábitats naturales de interés comunitario, ha sido propuesto por la Consejería de Medio Ambiente para que sea declarado Lugar de Importancia Comunitaria (LIC) (figura 2), en aplicación de esta Directiva y por tanto que sea considerado Zona de Especial Conservación (ZEC).

La aplicación de la Directiva 92/43/CEE, del Consejo, de 21 de mayo, determina la existencia en el Parque Natural de 15 hábitats incluidos en su Anexo I, de los cuales seis están considerados de interés prioritario (\*) (tabla 2).

Tabla 2: Hábitats incluidos en el Anexo I de la Directiva 92/43/CEE

| CODIGO | TIPO DE HÁBITAT                                                                                                   |
|--------|-------------------------------------------------------------------------------------------------------------------|
| 1310   | Vegetación anual pionera con <i>Salicornia</i> y otras especies de zonas fangosas o arenosas.                     |
| 1320   | Pastizales de <i>Spartina</i> ( <i>Spartinion maritim</i> ).                                                      |
| 1420   | Matorrales halófilos mediterráneos y termoatlánticos ( <i>Sarcocornetea fruticosi</i> ).                          |
| 1510   | Estepas salinas mediterráneas. (*)                                                                                |
| 2150   | Dunas fijas descalcificadas atlánticas ( <i>Calluno-Ulicetea</i> ). (*)                                           |
| 2230   | Dunas con céspedes del <i>Malcomietalia</i> .                                                                     |
| 2250   | Dunas litorales con <i>Juniperus</i> spp. (*)                                                                     |
| 2260   | Dunas con vegetación esclerófila del <i>Cisto-Lavanduletalia</i>                                                  |
| 3170   | Estanques temporales mediterráneos. (*)                                                                           |
| 4020   | Brezales húmedos atlánticos de zonas templadas de <i>Erica ciliaris</i> y <i>Erica tetralix</i> . (*)             |
| 6220   | Zonas subestépicas de gramíneas y anuales del <i>Thero-Brachypodietea</i> . (*)                                   |
| 6420   | Prados húmedos mediterráneos de hierbas altas del <i>Molinion-Holoschoenion</i> .                                 |
| 91B0   | Fresnedas termófilas de <i>Fraxinus angustifolia</i> .                                                            |
| 92A0   | Bosques galería de <i>Salix alba</i> y <i>Populus alba</i> .                                                      |
| 92D0   | Galerías y matorrales ribereños termomediterráneos ( <i>Nerio-Tamaricetea</i> y <i>Securinegion tinctoriae</i> ). |
| 9330   | Alcornocales de <i>Quercus suber</i> .                                                                            |

Figura 2. LIC propuestos en el entorno del Parque Natural de Doñana  
(Ver anexo cartográfico en [www.juntadeandalucia.es/medioambiente](http://www.juntadeandalucia.es/medioambiente))

|                                      |                                              |
|--------------------------------------|----------------------------------------------|
| 1. Marisma de las Carboneras         | 12. Laguna del Portil                        |
| 2. Estuario del Río Tinto            | 13. Dehesa del Estero y Montes de Moguer     |
| 3. Marismas del Odiel                | 14. Estuario del Río Piedras                 |
| 4. Estero de Domingo Rubio           | 15. Doñana Norte y Oeste                     |
| 5. Enebrales de Punta Umbría         | 16. Dehesa de Torrecuadros y Arroyo de Pilas |
| 6. Lagunas de Palos y las Madres     | 17. Corredor ecológico del Guadiamar         |
| 7. Dunas del Odiel                   | 18. Bajo Guadalquivir                        |
| 8. Parque Nacional de Doñana         | 19. Parque Natural de Doñana                 |
| 9. Laguna de los Tollos              | 20. Salado de Lebrija-Las Cabezas            |
| 10. Corredor ecológico del Río Tinto | 21. Río Guadalete                            |
| 11. Marismas y ribera del Tinto      |                                              |

En este espacio se encuentran, al menos, 16 especies de fauna recogidas en el Anexo II de la Directiva 92/43/CEE. Estas especies son: lamprea marina (*Petromyzon marinus*), sollo o esturión (*Acipenser sturio*) (actualmente se considera extinto en el Parque Natural), sábalo (*Alosa alosa*), saboga (*Alosa fallax nilotica*), boga (*Chondrostoma polylepis*), pardilla (*Rutilus lemmingii*), fartet (*Aphanius iberus*), sapillo pintojo meridional (*Discoglossus galganoi*), galápago leproso (*Mauremys leprosa*), galápago europeo (*Emys orbicularis*), tortuga



mora (*Testudo graeca*), lince ibérico (*Lynx pardinus*), murciélago grande de herradura (*Rhinolophus ferrumequinum*), murciélago ratonero mediano (*Myotis blythii*) y nutria (*Lutra lutra*).

De las especies de flora recogidas en la citada Directiva, destacan las siguientes: *Linaria tursica* (Scrophulariaceae), *Micropyropsis tuberosa* (Gramineae), *Armeria velutina* (Plumbaginaceae), *Gaudinia hispanica* (Gramineae) y *Thorella verticillato-inundata* (Umbelliferae).

También están documentadas numerosas especies de aves recogidas en el Anexo I de la Directiva 79/409/CEE, de 2 de abril; prueba de la importancia de este enclave natural para la conservación de la avifauna. Entre ellas pueden destacarse el flamenco rosa (*Phoenicopterus ruber*), la malvasía común (*Oxyura leucocephala*), el águila imperial ibérica (*Aquila adalberti*), el águila calzada (*Hieraaetus pennatus*), el águila pescadora (*Pandion haliaetus*), la cigüeña negra (*Ciconia nigra*), el calamón (*Porphyrio porphyrio*), el alimoche (*Neophron percnopterus*), el buitre leonado (*Gyps fulvus*), la garza imperial (*Ardea purpurea*), o la grulla común (*Grus grus*). Asimismo, hay más de 30 especies migratorias incluidas en el Anexo II de la citada Directiva, como el zorzal común (*Turdus philomelos*), la alondra (*Alauda arvensis*), el ánade real (*Anas platyrhynchos*), el avefría (*Vanellus vanellus*) o el ánsar común (*Anser anser*).

## 2.5. FAUNA

Además de las especies de fauna mencionadas en el apartado anterior, el Parque Natural cuenta con una importante riqueza faunística, algunas de las cuales encuentran en este espacio natural uno de los pocos reductos que aún se localizan en la Comunidad Autónoma y Península Ibérica.

El hecho de que el Parque Natural esté constituido por cuatro sectores discontinuos, con características ecológicas diferentes, ha determinado que las poblaciones faunísticas sean muy distintas en un sector y en otro.

Los Sectores Este y Sur, en los que predomina el espacio marismero, son los que presentan una mayor capacidad de acogida para la ictiofauna; es el caso de ambas orillas del Guadalquivir, el Brazo de la Torre, Entremuros y en el Sector Norte el Caño Guadiamar. Por su parte, las especies de agua dulce se pueden encontrar en algunas lagunas permanentes de la zona de El Abalarío.

Algunas de las especies de peces son muy raras: sáballo, espinosillo (*Gasterosteus aculeatus*), fartet y lamprea.

En total hay 11 especies de anfibios, cuya distribución está principalmente condicionada por la existencia de ambientes favorables para la reproducción, como charcas temporales, lagunas, arroyos y canales. Por esta razón, el Sector Norte y el Oeste son los que albergan un mayor número de especies. Destaca la presencia del tritón ibérico (*Triturus boscai*) y el sapillo pintojo meridional, por su rareza.

Entre los reptiles, se han registrado un total de 22 especies entre el Parque Natural y su entorno, concentrándose la mayoría en los Sectores Oeste, Norte y Sur, mientras que en el Sector Este el predominio de las zonas de marisma hace que sean poco frecuentes.

Es destacable la presencia del camaleón (*Chamaeleo chamaeleon*), con un área de distribución muy restringida y escasas poblaciones, y el galápago europeo.

La avifauna es sin duda el grupo más abundante, con un total de 224 especies registradas, ya sean reproductoras, invernantes, o frecuentes en paso migratorio, cifra que no contempla aquellas cuya presencia se ha determinado como ocasional o accidental.

Tanto la riqueza biológica como el número de especies de aves reproductoras varía en los distintos sectores del Parque Natural. Los elevados valores de los sectores Norte y Sur se explican por la presencia de pinares maduros, dehesas, zonas de marisma y espacios de ecotono, así como el bosque galería mejor conservado del Parque Natural en el caso del Sector Norte.

Aún presentando valores inferiores, el interés del Sector Oeste se debe fundamentalmente a las comunidades que alberga: junto a la comunidad avícola propia de los ecosistemas forestales, se presenta la de aves costeras -muy relevante en la época invernal-, destacando especialmente la gaviota picofina.

Por su parte, en las zonas de marisma natural, semitransformada o transformada del Sector Este, sobresale la presencia de anátidas y limícolas como grupos más importantes.

En líneas generales, algunas de las especies más emblemáticas del Parque Natural son el águila imperial ibérica, el avetoro común (*Botaurus stellaris*), el morito (*Plegadis falcinellus*) y el torillo andaluz (*Turnix sylvatica*), cuya población se encuentra en situación de preextinción.

Gracias a las acciones de conservación y recuperación que se vienen realizando, varias especies de aves muestran una tendencia a la recuperación, entre ellas la cerceta pardilla (*Marmaronetta angustirostris*), la focha moruna (*Fulica cristata*), y la malvasía, y otras ya mencionadas como el morito y el avetoro.

Por último, y en lo que respecta a los mamíferos, la cifra asciende a 37 especies citadas en el Parque Natural. Muchas de ellas se encuentran amenazadas en mayor o menor grado, tanto a nivel local como de especie.

En este sentido, destaca el lince ibérico como el más amenazado, siendo crítica su conservación en Doñana. Uno de los problemas con el que se enfrentan sus poblaciones es la reducida posibilidad de dispersión, debido a la creciente transformación de espacios forestales en el entorno, con la consecuente reducción de los hábitats potenciales utilizados por la especie, la proliferación de infraestructuras viarias y la disminución del tamaño poblacional de sus presas.

Otros mamíferos interesantes por su valor de conservación lo constituyen la nutria y diversas especies de murciélagos.

Alberga además otras especies amenazadas recogidas en el Catálogo Andaluz de Especies Amenazadas, creado por la Ley 8/2003, de 28 de octubre (tabla 3):

Tabla 3. Especies recogidas en el Catálogo Andaluz de Especies Amenazadas (en peligro de extinción, sensible a la alteración de su hábitat y vulnerables).

|                   |                                |                                                                                                                                                                                                                              |
|-------------------|--------------------------------|------------------------------------------------------------------------------------------------------------------------------------------------------------------------------------------------------------------------------|
| <b>Categorías</b> | <i>En peligro de extinción</i> | Peces: fartet                                                                                                                                                                                                                |
|                   |                                | Reptiles: tortuga mora                                                                                                                                                                                                       |
|                   |                                | Mamíferos: lince ibérico                                                                                                                                                                                                     |
|                   |                                | Aves: alimoche, águila imperial ibérica, cigüeña negra, avetoro común, garcilla cangrejera, cerceta pardilla, porrón pardo ( <i>Aythya myroca</i> ), malvasía común, torillo, focha cornuda, avutarda ( <i>Otis tarda</i> ). |
|                   | <i>Vulnerables</i>             | Aves: aguilucho cenizo ( <i>Circus pygargus</i> )                                                                                                                                                                            |

El conocimiento sobre los invertebrados del Parque Natural es bastante escaso en general; tan sólo con relación a las especies de zooplancton la información es más detallada. Destaca la abundancia del cangrejo rojo de río americano (*Procambarus clarkii*), especie introducida que se encuentra ampliamente

distribuida en el espacio protegido.

De forma general, los principales factores de riesgo para la fauna son los siguientes:

- Las transformaciones del medio debidas a la actividad humana, que han supuesto la regresión de determinados hábitats, con efectos desfavorables para diversas especies animales.
- La presencia de especies exóticas, se considera un problema importante tanto por la competencia con las especies autóctonas como por los fenómenos de hibridación con éstas. Es el caso de la malvasía canela (*Oxyura jamaicensis*), la carpa (*Ciprinus carpio*), el cangrejo rojo americano, el cangrejo chino (*Eriocheir sinensis*) y el fúndulo o sapillo (*Fundulus heteroclitus*). Se vienen desarrollando campañas de erradicación de algunas de estas especies, destacando por su éxito las efectuadas contra la malvasía canela.
- Las muertes por atropello en carreteras y la colisión o electrocución en tendidos eléctricos. El primero de ellos afecta a varias especies de mamíferos entre las que destaca el lince, así como algunos anfibios y reptiles. Los segundos afectan más a las aves, fundamentalmente al grupo de las rapaces y las ardeidas. También afecta de forma especial al águila imperial ibérica, aunque las actuaciones llevadas a cabo en los últimos diez años permiten hablar de una reducción del número de muertes.
- El reducido tamaño de las poblaciones de las especies presa, fundamentales en la dinámica de los ecosistemas mediterráneos, como es el caso del conejo. Este es un factor especialmente relevante en la conservación del lince y el águila imperial ibérica.

## **2.6. APROVECHAMIENTO DE LOS RECURSOS NATURALES**

### **2.6.1. AGRICULTURA**

La agricultura es un factor determinante de la economía en la comarca de Doñana, de la que además se derivan efectos positivos sobre la biodiversidad, los paisajes y el mantenimiento de los elementos culturales y etnográficos del Parque Natural. Se concentra principalmente en los enclaves con las mejores tierras y facilidad de acceso, y se caracteriza por su diversidad, tanto en relación con la superficie como a los tipos de cultivos, técnicas de producción y demanda de mano de obra. Actualmente, un 10% de la superficie del Parque Natural está dedicado a usos agrícolas.

Los cultivos más importantes en la comarca, bien por su incidencia territorial, bien por la económica, son el fresón, el arroz, el olivar, el viñedo, los frutales y, en menor medida, los cultivos industriales (algodón, remolacha y girasol, principalmente) y forrajeros. Es importante señalar el creciente interés de los agricultores por desarrollar técnicas más respetuosas con el medio natural, y la labor que en este sentido han venido realizando las Asociaciones de Productores de Producción Integrada.

El cultivo de la fresa se centra en la provincia de Huelva, y se puede considerar como uno de los más emergentes y de mayor importancia económica en la comarca, tanto por los beneficios económicos que genera, como por la demanda de mano de obra que requiere.

Los aspectos más relevantes en cuanto a la incidencia de este cultivo sobre su entorno son los relativos al uso de aguas subterráneas para riego, lo que determina un descenso de los niveles freáticos y una reducción en los volúmenes hídricos disponibles, y al empleo de fertilizantes y fitosanitarios, que disminuye la calidad de las aguas, fundamentalmente por contaminación por nitratos. Destacan, asimismo, la pérdida de superficie forestal, el incremento de los procesos erosivos que implican una transformación del paisaje, y la fragmentación del territorio, que dificulta la conectividad biológica entre los ecosistemas.

El cultivo del arroz es también una actividad de gran peso en la comarca de Doñana, tanto desde el punto de vista de la superficie ocupada, que se ha estimado del orden de las 35.000 ha, como de la producción, que representa en torno al 44% del total nacional.

Dentro del Parque Natural la superficie actual de este cultivo es de unas 1.500 ha, que se concentran en el Sector Norte, concretamente en el paraje de Hato Blanco, de unas 1.000 ha, y en el Sector Este, en varios enclaves diferenciados, entre los que destaca la superficie ocupada en Veta La Palma, del orden de las 500 ha.

En cuanto a los aspectos medioambientales, si bien esta superficie guarda complejas relaciones con la avifauna marismeña, hay que destacar la aplicación de abonos y pesticidas en general, y la extracción de aguas subterráneas para riego en Hato Blanco, puesto que en el resto de arrozales el agua de riego proviene de los cursos superficiales del río Guadalquivir.

El cultivo de frutales en regadío se caracteriza por la diversidad de productos y la dispersión territorial por toda la comarca, estando presentes en casi todos los términos municipales. Está representado fundamentalmente por naranjos en Almonte y melocotoneros en Palos de la Frontera. Genera importantes beneficios, cercanos a los obtenidos con la fresa, como la elevada demanda de mano de obra, a lo que se une el desarrollo de actividades relacionadas con la transformación y manipulación de los productos.

Bajo el punto de vista medioambiental, los principales riesgos se relacionan con la explotación de los acuíferos, y en menor medida los derivados del uso de pesticidas.

El olivar adquiere una gran importancia en cuanto a superficie ocupada en el entorno de Doñana, de tal forma que los niveles de empleo tanto en el sector agrario como en las industrias transformadoras hacen que sea un elemento clave para la economía de la comarca. Sin embargo, dentro del espacio protegido tiene escasa incidencia, ocupando una superficie inferior al 0,1%, muy localizada en la mitad meridional del Sector Norte.

Otros cultivos en régimen de secano ocupan una extensión reducida dentro de los límites del Parque Natural, emplazándose en los Sectores Norte y Este del mismo.

### 2.6.2. GANADERÍA

La actividad ganadera ha constituido una de las bases de aprovechamiento de la comarca de Doñana, así buena parte de sus paisajes y formaciones vegetales están ligados estrechamente al pastoreo, y aunque con una importancia mucho más reducida, aún se mantiene como una actividad relevante que genera importantes externalidades positivas en el territorio del Parque Natural (mantenimiento de la biodiversidad de las dehesas y otras formaciones pascícolas, su vinculación afectiva e histórica con el paisaje marismeño, su significado antropológico, cultural y etnográfico, etc.), lo que contribuye a configurar su identidad.

En el conjunto del territorio predomina el ganado bovino de razas autóctonas, lidia y retinto, en régimen extensivo o semi-extensivo. Se cuentan unas 4.500 cabezas, la mayoría en el Sector Norte, una cuarta parte en el Este y algunas en el Sur. El ganado ovino, con algo más de 3.000 cabezas, y el caprino, con unas 650, le siguen en importancia, aunque están en regresión actualmente; se localizan en su totalidad en el Sector Norte. Existen además unas 200 cabezas de ganado caballar pastando en los tres sectores citados.

El Sector Norte del Parque Natural concentra, por tanto, la mayor parte de la carga ganadera, que se distribuye sobre todo en el medio forestal, especialmente en la dehesa, aunque también en el pinar y en la zona de pastizal del ecotono de la Vera. La intensa presión del ganado sobre semillas y plántulas dificulta la regeneración de las masas de alcornoque. En el Sector Este la mayor concentración de cabaña ganadera se

da en el ámbito de Veta la Palma, aunque también se reparte por otras de pastizal y marisma. En el Sector Sur, el ganado se distribuye fundamentalmente en las áreas de marisma natural, seminatural y transformada.

Las principales incidencias de la actividad ganadera se relacionan, por un lado, con la presencia irregular de ganado, como es el caso del tramo norte del Brazo de la Torre, o el ganado bovino en algunas zonas de los Sectores Oeste y Sur. Por otro lado, debe reseñarse la intensa presión pastante en algunas zonas de la Vera y la marisma.

### 2.6.3. APROVECHAMIENTOS FORESTALES

Aproximadamente, 14.689 ha del Parque Natural son de titularidad pública o con gestión participada por la Administración mediante convenios o consorcios (tabla 4), además las fincas, Coto I y II de Hato Ratón se encuentran en proceso de adquisición por parte de la Consejería de Medio Ambiente. Asimismo, existen dos fincas privadas en el Sector Norte del Parque Natural: Gato y Coto del Rey.

Los aprovechamientos forestales constituyen una actividad económica de escaso peso en la economía regional. En el Parque Natural, la mitad de la superficie está ocupada por masas forestales dedicadas básicamente a una función protectora, ya que el aprovechamiento de la madera o de la piña es muy reducido. Como consecuencia de la pérdida de rentabilidad de los aprovechamientos forestales, las masas forestales acogen en tendencia creciente actividades recreativas.

El principal efecto de la actividad forestal realizada en el siglo XX ha sido la extensión de las repoblaciones de eucalipto, caracterizadas por un sotobosque muy poco desarrollado y de baja diversidad. La sustitución de las masas de eucalipto por pinar y otras especies autóctonas es una de las medidas de carácter forestal que se encuentra más avanzada: se han eliminado el 97% de los eucaliptos del Parque Natural.

Tabla 4. Listado de montes públicos del Parque Natural

| NOMBRE                                                        | TITULARIDAD | MUNICIPIO                   | SUPER. APROX.(HA) |
|---------------------------------------------------------------|-------------|-----------------------------|-------------------|
| Grupo Coto Bayo-Ibarra                                        | JA          | Almonte                     | 10.232            |
| Coto Mazagón I                                                | JA          | Moguer                      | 2.810             |
| Coto Mazagón II                                               | JA          | Lucena del Puerto           | 503               |
| Coto Mazagón III                                              | JA          | Moguer                      | 364               |
| Coto Mazagón IV                                               | JA          | Lucena del Puerto           | 40                |
| Dunas de Almonte                                              | JA          | Almonte                     | 1.406             |
| Grupo de Montes de Hinojos (II)<br>Montes Propios y Paredejas | CCAY        | Hinojos                     | 1.592             |
| Grupo Bodegones - Cabezudos                                   | JA          | Almonte                     | 88                |
| El Acebuche                                                   | MMA         | Almonte                     | 1.424             |
| Coto la Matilla II                                            | JA          | Lucena del Puerto           | 26                |
| Pinar de la Algaida                                           | CCAY        | Sanlúcar de Barrameda       | 685               |
| La Juncosilla                                                 | JA          | Villamanrique de la Condesa | 338               |
| Corredor verde de Aznalcázar                                  | JA          | Aznalcázar                  | 1.786             |
| Corredor verde de Isla Mayor                                  | JA          | Isla Mayor                  | 421               |
| Corredor verde de Puebla del Río                              | JA          | Puebla del Río              | 1                 |

|                 |    |         |       |
|-----------------|----|---------|-------|
| Marisma Gallega | JA | Hinojos | 1.788 |
|-----------------|----|---------|-------|

JA - Titularidad de la Junta de Andalucía; CCAY - Montes de Ayuntamientos con Convenio de Cooperación con la Administración; AY - Montes de Ayuntamientos

Un segundo efecto de estas actuaciones forestales ha sido la excesiva homogeneidad de las comunidades vegetales, con predominio actual de repoblaciones de pinar, y escaso desarrollo de las formaciones de matorral. Existen varias repoblaciones recientes con portes raquíuticos y densidad excesiva, que presentan escaso desarrollo del estrato arbóreo y arbustivo.

Las masas forestales en el Sector Norte y Oeste, mantienen un régimen de aprovechamiento de baja intensidad, compatible con los objetivos de conservación y mantenimiento de la funcionalidad ecológica de dichas masas. Esto ha permitido la pervivencia de un sector forestal basado en el aprovechamiento de la madera y el piñón. La producción artesanal de carbón se encuentra hoy en crisis. La explotación del corcho de los alcornocales del Sector Norte sigue realizándose en la actualidad, si bien puede calificarse como una actividad claramente marginal. La apicultura es también una actividad que se localiza tanto en los eucaliptales como en las masas de pinar, mediante el empleo de colmenas móviles.

Los principales problemas asociados a estas actividades son de carácter claramente puntual y de escasa relevancia, produciéndose cuando existe interferencia de las labores que se realizan en el monte con los ciclos de reproducción de algunas especies amenazadas o con la necesaria conservación de especies de matorral higrófilo.

#### 2.6.4. CAZA Y PESCA

La actividad cinegética ha representado tradicionalmente una de las actividades más importantes de la zona.

Actualmente, adquiere importancia la caza de aves acuáticas. Las especies objeto de caza son principalmente anátidas, destacando en primer lugar el ánasar común y en menor medida otras especies como el ánade real, el pato cuchara, el ánade rabudo y el ánade silbón. Como problemas asociados al desarrollo de esta práctica se encuentran la captura de especies amenazadas y el plumbismo derivado de la ingesta, por parte de las aves, de los perdigones que se acumulan en algunas zonas.

La caza mayor, principalmente de ciervo y jabalí, tiene lugar en el Sector Norte y Oeste. La caza menor, con el conejo y la perdiz como principales especies cinegéticas, se localiza mayoritariamente en las zonas forestales de los Sectores Norte y Oeste.

La totalidad de los cotos cuentan con los correspondientes Planes Técnicos, estando prevista la creación de la Comarca Cinegética de las Marismas del Guadalquivir.

La pesca fluvial se desarrolla en su mayor parte fuera de los límites del Parque Natural, a lo largo del río Guadalquivir y en la desembocadura del Brazo de la Torre. Se centra en la angula y el camarón de río, siendo más variable la pesca del cangrejo rojo americano. El uso de artes prohibidas en la captura de la angula y el camarón está perjudicando en mayor o menor grado a otras poblaciones de peces, anfibios y reptiles. También se produce mortalidad de aves acuáticas en nasas cangrejerías usadas de manera ilegal, que no impiden la entrada de aves.

#### 2.6.5. ACUICULTURA

En el Parque Natural existen dos empresas autorizadas por la Consejería de Agricultura y Pesca y dedicadas a la acuicultura:

- Acuinova Andalucía, S.A. "Finca San Carlos", con una superficie autorizada de 55 ha, para el cultivo de doradas y langostinos (Sanlúcar de Barrameda, Cádiz).

- Pesquerías de Isla Mayor, S.A. "Finca Veta la Palma", con una superficie autorizada de 3.226 ha para el cultivo de dorada, lubina y especies de estero (Puebla del Río, Sevilla). Esta explotación, tiene gran importancia para las aves, ya que funciona como lugar de refugio en épocas de sequía y de descanso durante las migraciones. La gestión realizada en dicha finca ha merecido el Premio Andalucía de Medio Ambiente, modalidad Conservación de la Naturaleza, en 1997, como ejemplo de compatibilización de la actividad productiva con la conservación de la naturaleza.

#### 2.6.6. OTRAS ACTIVIDADES

Existen algunas explotaciones de salinas en el Sector Sur. Al poseer agua todo el año mantienen elevadas densidades de aves, por lo que las labores propias de la actividad deben desarrollarse de manera que se mantenga el valor biológico de la instalación.

Existe además un aprovechamiento, poco importante, de la cabrilla y el caracol.

### 2.7. DEMOGRAFÍA Y ACTIVIDAD ECONÓMICA

Las inversiones realizadas en la comarca de Doñana en los últimos años con motivo del Plan de Desarrollo Sostenible, para cuyo seguimiento se creó, mediante el Decreto 478/1996, de 22 de octubre, la Oficina del Plan de Desarrollo Sostenible del Entorno de Doñana, han supuesto un notable empuje al desarrollo de la zona. Durante los últimos años se ha podido constatar un aumento significativo de los efectivos poblacionales de la mayor parte de los núcleos urbanos en el ámbito de Doñana. La población de los municipios incluidos en el Parque Natural se encuentra en torno a los 146.000 habitantes (Instituto de Estadística de Andalucía, 2003), aunque en el espacio natural protegido no hay núcleos de población en su interior.

El incremento demográfico se explica por el saldo migratorio positivo que se ha mantenido desde los años 90, añadido a un crecimiento vegetativo elevado. La estructura por edades refleja, consecuentemente, una población joven. Como un fenómeno de implantación reciente debe señalarse la presencia de una población inmigrante de origen extranjero cada vez más importante, que acude a trabajar en las faenas agrícolas.

La tasa de actividad se ha incrementado paralelamente a una reducción significativa de los niveles de desempleo. En buena medida los volúmenes de población parada han sido absorbidos por la agricultura de regadío, y en particular por los cultivos de fresa y fresón, así como por las explotaciones de arrozal, aunque con un peso notablemente inferior.

El sector agrícola es el más importante, y representa la principal ocupación de la población de la comarca de Doñana. Se caracteriza por ser un sector que presenta una gran temporalidad en el empleo, al estar vinculado a las diferentes campañas agrícolas.

El sector industrial no está muy desarrollado en la comarca, configurándose más como una zona productora de materias primas cuya transformación se realiza principalmente en el exterior. Destacar que en el interior del espacio protegido no tiene lugar ninguna actividad industrial.

Por su parte, el sector servicios también contribuye a la ocupación de la población activa; tal es el caso del turismo, que se concentra en los términos de Almonte, Sanlúcar de Barrameda, Moguer y Palos de la Frontera. De hecho, la mayor parte de los puestos de trabajo en Mazagón y Matalascañas están ligados a la hostelería y restauración, aunque su número es reducido a escala comarcal comparado con los empleos agrícolas. Se trata en cualquier caso de un turismo estacional, concentrado especialmente en la época estival. La aldea de El Rocío es otro núcleo importante para el desarrollo de estas actividades durante todos los fines de semana del año, aunque cobra especial importancia cuando se celebra la romería a la que le da nombre.



Actualmente hay una clara apuesta por el turismo en el medio rural y el turismo activo como alternativas al turismo intensivo de la franja costera, el cual entraña un mayor riesgo para la conservación de los valores del territorio. El Parque Natural cuenta con casi un centenar de empresas del sector ecoturístico que suponen alrededor de un 6% del total en los Parques Naturales de Andalucía.

Por último, la construcción es una actividad que en la actualidad presenta un cierto dinamismo de alguna forma vinculado al crecimiento demográfico de la zona y al desarrollo de las obras públicas contempladas en el Plan de Desarrollo Sostenible. Aun así, no constituye una de las actividades de mayor peso en la economía de la zona.

## 2.8. URBANISMO

Todos los municipios pertenecientes al Parque Natural disponen de su correspondiente figura de planeamiento urbanístico (tabla 5).

La planificación urbanística de los mismos establece un desarrollo urbano a partir de los núcleos preexistentes, evitándose así los procesos de expansión urbana sobre el espacio protegido.

Tabla 5. Figuras de planeamiento de los municipios del Parque Natural

| TÉRMINO MUNICIPAL           | FIGURA PLANEAMIENTO    | FECHA DE ACUERDO |
|-----------------------------|------------------------|------------------|
| Almonte                     | Plan General Municipal | 19/02/85         |
| Aznalcázar                  | Normativa Subsidiaria  | 21/02/90         |
| Hinojos                     | Normativa Subsidiaria  | 10/02/97         |
| Lucena del Puerto           | Normativa Subsidiaria  | 15/04/93         |
| Moguer                      | Normativa Subsidiaria  | 21/01/92         |
| Palos de la Frontera        | Normativa Subsidiaria  | 09/10/95         |
| Pilas                       | Normativa Subsidiaria  | 04/10/96         |
| La Puebla del Río           | Normativa Subsidiaria  | 01/03/84         |
| Villamanrique de la Condesa | Normativa Subsidiaria  | 30/11/94         |
| Isla Mayor                  | Normativa Subsidiaria  | 01/03/84         |
| Sanlúcar de Barrameda       | Plan General Municipal | 30/01/96         |

Fuente: Consejería de Obras Públicas y Transportes, 2004

En el interior del Parque Natural no hay conflictos de importancia en materia urbanística, centrándose la mayoría de los problemas al respecto fuera de los límites del espacio protegido.

En este sentido, también es importante destacar que en los últimos años se ha consolidado un modelo de aglomeración del suelo urbano industrial (polígonos) en zonas alejadas de los núcleos de población, apoyándose en los ejes viarios más importantes. Está prevista la puesta en marcha de un polígono de 40 hectáreas para industrias de transformación agropecuaria que se situará en la carretera de Almonte-El Rocío; en Pilas, dos planes parciales que rodean y completan al polígono "Los Ventolines", ya consolidado; y otro en La Puebla del Río.

Por lo tanto, los principales factores de riesgo bajo un punto de vista ambiental son indirectos y están vinculados a las actividades derivadas de las acciones urbanísticas que tienen lugar fuera del espacio protegido. Tal es el caso del incremento de los procesos erosivos y la colmatación de los ambientes de marisma y ecotono, de la alteración y fragmentación de los hábitats, y de las deficiencias en la depuración de aguas residuales y la explotación de los acuíferos.

## **2.9. INFRAESTRUCTURAS**

### **2.9.1. ABASTECIMIENTO DE AGUAS**

El abastecimiento urbano de aguas se resuelve de manera muy diferente en los distintos núcleos pertenecientes a los municipios incluidos dentro del Parque Natural de Doñana. Así, Hinojos, Villamanrique de la Condesa e Isla Mayor se abastecen directamente de captaciones del acuífero subterráneo, mientras que el resto de municipios lo hacen con aguas superficiales de la cuenca del Guadalquivir.

A éstos hay que añadir, aunque fuera del Parque Natural, los núcleos de El Rocío y Matalascañas, especialmente el último, que también se abastecen de aguas subterráneas. Por su parte, Mazagón se abastece de aguas superficiales.

El abastecimiento de aguas a través de captaciones subterráneas en los términos municipales referidos contribuye, junto con las actividades agrarias, a la sobreexplotación del acuífero. Esta situación supone un problema en la medida que los recursos hídricos constituyen la base ecológica de la mayor parte del territorio del Parque Natural, y del conjunto de la comarca de Doñana. Su importancia se incrementa si se toma en consideración el hecho de que la población de dichos municipios ha aumentado durante la última década, como ha ocurrido con carácter general en la región.

Esto ha motivado que las diferentes administraciones públicas implicadas hayan previsto diversas actuaciones a corto y medio plazo con el objetivo común de suprimir las extracciones subterráneas y solucionar el abastecimiento urbano en base a los aporte hídricos procedentes de las aguas superficiales de la Cuenca del Guadalquivir.

### **2.9.2. VERTIDO Y DEPURACIÓN DE AGUAS**

La situación del Parque Natural en materia de vertidos y depuración de aguas ha mejorado notablemente en los últimos años con la puesta en marcha de sistemas de depuración y con la construcción y puesta en funcionamiento de estaciones depuradoras de aguas residuales en Almonte, Moguer, Palos de la Frontera, Aznalcázar, Isla Mayor, Pilas, Villamanrique de la Condesa, Sanlúcar de Barrameda, Hinojos y Lucena del Puerto. Por su parte la estación depuradora de aguas residuales de La Puebla del Río se encuentra en construcción.

### **2.9.3. CARRETERAS**

El principal acceso a la zona se canaliza a través de la A-49 entre Sevilla y Huelva. Por el interior del Parque Natural discurren diversas carreteras de la red secundaria que conectan los distintos núcleos agrícolas. Aunque fuera de los límites del espacio protegido, también destaca la presencia de la A-483, que conecta Almonte y Matalascañas, y que soporta un importante volumen de tráfico, especialmente durante el periodo estival.

En el ámbito del Parque Natural el eje viario de mayor conflictividad, sobre todo en lo que se refiere a muertes por atropello, pero también por efecto de compartimentación de poblaciones, lo constituyen las carreteras que comunican entre sí los núcleos de Mazagón, Matalascañas, El Rocío y Villamanrique de la Condesa. Algunas de las especies afectadas son de gran valor y tienen unas poblaciones muy reducidas, siendo el caso extremo el del lince ibérico, aunque también hay que citar otros carnívoros como el gato montés y el tejón.

Las carreteras constituyen uno de los factores condicionantes de mayor importancia para el trasiego y desplazamiento de las especies de fauna silvestre entre el Abalario, Sector Oeste, el Parque Nacional y el resto de sectores del Parque Natural, así como, un límite a las posibilidades de expansión territorial de algunas especies de interés, como pueden ser la tortuga mora y el camaleón, entre otras.

#### 2.9.4. VÍAS PECUARIAS

Son varias la vías pecuarias que discurren por este espacio, con un longitud total aproximada de unos 40 km, en su mayoría en el Sector Norte (tabla 6).

Actualmente, aunque su función originaria ha quedado en desuso, configuran una red viaria que facilita la comunicación en el interior del espacio protegido. La mayor parte se utilizan por agricultores y trabajadores del sector forestal, aunque también hay un uso creciente de las mismas para uso recreativo. Un caso especial es el de las romerías, en particular el Rocío, que suponen un uso intensivo de varias de estas vías, sobre todo durante los fines de semana y época estival, como es el caso de la vía Raya Real.

Tabla 6. Vías Pecuarias del Parque Natural de Doñana

| PROVINCIA | MUNICIPIO                   | VIA PECUARIA                                | PROYECTO DE CLASIFICACIÓN |
|-----------|-----------------------------|---------------------------------------------|---------------------------|
| SEVILLA   | Aznalcázar                  | CR de la Marisma Gallega                    | O. M. 12/09/1956          |
|           |                             | Ramal izqdo. de la CR de la Marisma Gallega |                           |
|           | Villamanrique de la Condesa | V de Hinojos                                | O.M. 08/06/1961           |
|           |                             | V del Camino de Sevilla y Rocío             |                           |
| CADIZ     | Sanlúcar de Barrameda       | Cl de Bonanza al Pozo de la Viuda           | O.M. 16/02/1954           |
|           |                             | CR del Monte Algaida                        |                           |
| HUELVA    | Almonte                     | V del Camino del Loro                       | O.M. 25/11/1975           |
|           | Hinojos                     | V del Carril del Lobo                       | O.M. 16/01/1976           |
|           |                             | V del Camino de Sevilla y Rocío             |                           |
|           | Lucena del Puerto           | V del Camino del Loro                       | Resolución 23/07/2001     |
| Moguer    | V del Camino del Loro       | O.M. 31/10/1975                             |                           |

CR: Cañada Real, Cl: Colada, V: Vereda

Las afecciones que han sufrido históricamente, relacionadas con las actividades agrícolas, las repoblaciones forestales, los procesos de urbanización y la creación de infraestructuras viarias, han influido en el actual estado de conservación de las vías pecuarias que, en el caso del Parque Natural, se encuentran, no obstante, en buen estado.

#### 2.9.5. INFRAESTRUCTURAS ENERGÉTICAS

La substancial ampliación de la red de tendido eléctrico que ha tenido lugar recientemente en la comarca, relacionada con la puesta en marcha de explotaciones agrícolas de regadío y arrozales, puede interpretarse como una circunstancia asociada a dichas actividades, tanto dentro como fuera de los límites del Parque Natural. En el interior del mismo se contabilizan actualmente más de 3.000 postes. En el conjunto de la comarca la cifra estimada supera las 6.000 unidades.

En los últimos años se han desarrollado distintos estudios en el interior del Parque Natural encaminados a la puesta en práctica de ciertas medidas para minimizar o eliminar los riesgos de electrocución.

Por último, deben mencionarse las perforaciones que han tenido lugar para localizar yacimientos de gas en diversas áreas del Parque Natural, como El Abalarío y Coto del Rey. Asimismo, indicar la existencia en los límites del Parque Natural de prospecciones operativas y de la conexión de gas desde los puntos de extracción en plataforma marina hasta la conducción básica, que se localiza en el corredor Huelva-Sevilla.

#### **2.9.6. VERTEDEROS**

Aunque se localizan fuera de los límites del Parque Natural, deben tomarse en consideración en el análisis y diagnóstico ya que representan áreas potenciales de contaminación del acuífero y aguas superficiales. Además tienen un efecto potencial sobre la fauna carroñera, que implica cambios en los hábitos de comportamiento, u otras afecciones de mayor gravedad como puede ser la ingestión de productos tóxicos o materiales plásticos.

#### **2.9.7. OTRAS INFRAESTRUCTURAS E INSTALACIONES**

En el Sector Oeste existe una instalación militar, el “Campo de Tiro Médano del Loro”, cuyas actividades se pueden considerar un factor de riesgo para ecosistemas sensibles. A tal efecto, el Ministerio de Defensa establecerá el régimen de utilización de la instalación a fin de aminorar el impacto que pudiese ocasionar el uso militar, de acuerdo con los mecanismos de cooperación vigentes. Asimismo, en la zona se encuentra el Campamento Militar de Arenosillo (INTA).

#### **2.10. TURISMO EN EL MEDIO RURAL, TURISMO ACTIVO Y USO PÚBLICO**

Como resultado de la reciente reordenación del sector turístico, se asiste al progresivo desarrollo de empresas de turismo activo cuya actividad está basada de forma muy importante en la existencia del Parque Nacional, el Parque Natural y otros enclaves de la Comarca, cuyos valores ecológicos y paisajísticos son utilizados como recurso. En este sentido, empieza a entrecerse que frente al turista tradicional, asociado a los núcleos de la costa, Mazagón, Matalascañas, Sanlúcar de Barrameda, aparece un nuevo concepto de “visitante”, que presenta un mayor interés y acercamiento hacia el medio natural y cultural. La afluencia de visitantes al Parque Natural ha experimentado un aumento importante durante los últimos años, relacionado con las necesidades de esparcimiento y ocio de los habitantes de los núcleos de población próximos. Esta fuerte demanda de acercamiento a la naturaleza, fundamentada mayoritariamente en actividades sedentarias, procede de los núcleos de Sevilla y Huelva.

Los datos de la encuesta llevada a cabo por EUROPARC-España con motivo del Plan de Acción de los Espacios Naturales Protegidos del Estado Español reflejan un volumen de aproximadamente 10.000 visitas al año en los equipamientos del Parque Natural de Doñana. Según los aportados por el Organismo Autónomo Parques Nacionales, los equipamientos y servicios de uso público del Parque Nacional reciben aproximadamente 400.000 visitas anuales. Por otra parte, se puede llegar a afirmar que el número de visitas que recibe la comarca de Doñana se mueve en torno a los 4 millones anuales.

Ante la importancia de estas actividades, tanto desde el punto de vista ambiental como el socioeconómico, destaca la elaboración del Programa de Uso Público del Parque Natural como instrumento que establece un modelo de uso público adecuado a las características del espacio.

En cuanto a los equipamientos gestionados por la Consejería de Medio Ambiente, existen dos centros de recepción de visitantes: el de Bajo de Guía, ubicado en el municipio de Sanlúcar de Barrameda, en el Sector Sur, y el de Villamanrique de la Condesa, en el Sector Norte. Asimismo, el Parque Natural cuenta con dos puntos de información, cuatro áreas recreativas, dos carriles cicloturísticos (unos 58 km), cinco senderos señalizados (unos 19 km) y un campamento de turismo. También se señala un punto de interés etnográfico ubicado en Sanlúcar de Barrameda, Sector Sur. La mayor parte de los equipamientos de uso público se localizan en el Sector Sur, Norte y Oeste. Por lo tanto cabe suponer que los dos ámbitos con mayor número de equipamientos acojan la mayor demanda de uso público, siendo de interés resaltar el significativo peso que tienen las actividades relacionadas con las romerías en el Sector Norte.

Por otro lado, cabe mencionar la existencia de cinco itinerarios en bicicleta con una longitud total aproximada de 153 km: Los Poblados, El Arrayán, Pinar de la Algaida-Marisma de Bonanza, Isla Mayor y Marismas del Guadalquivir.

Tabla 7. Equipamientos de uso público del Parque Natural de Doñana

| <b>ÁREAS RECREATIVAS</b>                                                      |                                                                   |
|-------------------------------------------------------------------------------|-------------------------------------------------------------------|
| Pinar de la Algaida<br>La Ermita                                              | Mazagón<br>El Arrayán                                             |
| <b>CAMPAMENTO PÚBLICO DE TURISMO: EL ARRAYÁN</b>                              |                                                                   |
| <b>CARRILES CICLOTURÍSTICOS</b>                                               |                                                                   |
| Playa de Castilla<br>Vereda del Loro                                          |                                                                   |
| <b>CENTRO DE VISITANTES:</b> Bajo de Guía, Dehesa Boyal Polideportivo         |                                                                   |
| <b>SENDEROS SEÑALIZADOS</b>                                                   |                                                                   |
| Cerro del Águila<br>Cuesta Maneli                                             | El Arrayán<br>Ribetehilo<br>Laguna del Jaral-Médano del Asperillo |
| <b>OBSERVATORIOS:</b> Laguna de Tarelo, Salinas de Salmar, Lucio del Cangrejo |                                                                   |
| <b>PUNTOS DE INFORMACIÓN:</b> El Arrayán, Cuesta Maneli                       |                                                                   |

El Parque Natural desarrolla un programa de educación ambiental en todos los municipios de su territorio, así como en Bonares, Rociana y Bollullos. Los principales objetivos del programa se estructuran en las siguientes líneas de actuación: comunicación social (actividades de sensibilización dirigidas a los diferentes sectores sociales), participación (Red de Voluntarios Ambientales), formación (capacitación de los

habitantes de Doñana), educación ambiental (consolidación o introducción de contenidos en los colegios y escuelas de la zona) e investigación (evaluar y corregir las actuaciones realizadas).

### **2.10.1. ACTIVIDADES ROCIERAS Y OTRAS ROMERÍAS**

La realización de numerosos tránsitos hacia El Rocío confiere a este aspecto del uso público una importancia especial, por el elevado número de visitantes que supone. Es necesario diferenciar entre los tránsitos rocieros organizados y controlados por las Hermandades, y el flujo de personas que realizan los diferentes recorridos hacia El Rocío fuera del control de éstas, y que supone un impacto sobre los recursos naturales. La mayor parte de los caminos públicos que concentran los tránsitos rocieros en dirección a El Rocío, se localizan en el Sector Norte del Parque Natural, sobre todo en los términos municipales de Hinojos y Villamanrique. Los caminos más importantes en términos de tránsito, son la vía pecuaria Raya Real y el camino Raya de los Vázquez, de menor uso que la anterior aunque la demanda parece crecer en época reciente. También es importante el Camino de Hinojos, que confluye con los anteriores a la altura del Puente del Ajolí.

El dispositivo para el control de tránsitos por el Parque Natural, dispuesto por la Consejería de Medio Ambiente en los principales caminos de acceso al mismo, arroja los siguientes resultados con respecto al año 2004: en total se registraron 41.301 personas, 3.957 caballos y carretas y 6.407 vehículos a motor en dirección a la aldea de El Rocío. Las cifras de retorno son menores (13.759 personas, 1.704 caballos y carretas, 2.401 vehículos a motor), indicando que la mayor parte de los peregrinos sólo atraviesan el espacio protegido en el viaje de ida.

Además de la romería de El Rocío, en el mes de octubre se celebra en el Pinar de la Algaida, Sanlúcar de Barrameda, una popular romería sacando en procesión la Virgen de la Algaida desde la ermita existente en el pinar del mismo nombre.

Figura 3. Equipamientos de uso público

(Ver anexo cartográfico en [www.juntadeandalucia.es/medioambiente](http://www.juntadeandalucia.es/medioambiente))

### **2.11. PATRIMONIO CULTURAL**

Junto con sus valores ecológicos, los valores culturales e históricos del entorno de Doñana conforman una realidad única e indisoluble, de forma que la dimensión humana es esencial para entender la evolución y el estado actual del espacio.

A pesar de ello, puede afirmarse que en cierta medida el valor ecológico de Doñana ha eclipsado su dimensión histórica y cultural, existiendo en este sentido, un cierto desconocimiento.

Con todo, es este un espacio de innegable importancia patrimonial, como se trasluce de la bibliografía existente al respecto, y de este modo se recoge en el Plan de Ordenación del Territorio del Ámbito de Doñana.

Asimismo, se refleja en las numerosas localizaciones arqueológicas existentes, así como en un número notable de monumentos, muchos de ellos asociados al Conjunto Histórico de los Lugares Colombrinos y al de Sanlúcar de Barrameda. En la tabla 8 se incluyen algunos los elementos que forman este

patrimonio arquitectónico.

Tabla 8. Bienes del patrimonio arquitectónico del entorno de Doñana

|                             |                                                                                                                                               |
|-----------------------------|-----------------------------------------------------------------------------------------------------------------------------------------------|
| <b>Moguer</b>               | Convento de Santa Clara (1337)<br>Casa museo de Zenobia-Juan Ramón<br>Casa natal de Juan Ramón Jiménez (s. XIX)<br>Castillo                   |
| <b>Palos de la Frontera</b> | Monasterio de la Rábida (1412)<br>Iglesia de San Jorge (s. XIV)<br>Casa de los Pinzón (s. XV)<br>Castillo (1332)<br>Torre del Oro y Arenillas |
| <b>Lucena del Puerto</b>    | Convento de Nuestra Señora de la Luz (s. XVI)                                                                                                 |
| <b>Hinojos</b>              | Iglesia de Santiago el Mayor<br>Torre de Malandar                                                                                             |
| <b>Almonte</b>              | Santuario de Nuestra Señora del Rocío<br>Torres de la Higuera, Carbonera, Zabalar y San Jacinto                                               |

Especial mención merecen las torres almenaras diseminadas por toda la Costa de la Luz. Construidas entre los siglos XVI y XVII para alertar de las incursiones de piratas berberiscos en estas aguas, las torres han sido declaradas Bienes de Interés Cultural en 1985, con categoría de Monumentos. Dentro de los límites del Parque Natural se hallan la Torre del Oro -Mazagón- y la Torre del Río del Oro y del Asperillo -Almonte-.

Al margen de la monumentalidad y la relevancia de elementos aislados, perviven en este espacio abundantes edificaciones rurales y construcciones singulares de interés etnológico, propias de la tradición popular de la zona; entre ellas, bodegas, almazaras, haciendas y lagares. En este sentido, deben destacarse los poblados forestales, estampa y huella del modo de vida tradicional y las formas constructivas de este territorio.

En cuanto al patrimonio arqueológico, el inventario de la Consejería de Cultura incluye 68 yacimientos en Doñana y su entorno. De especial interés son los localizados en la franja litoral que va desde el acantilado de la Torre del Loro hasta la Torre de la Higuera; estos yacimientos, que datan de la prehistoria reciente (IV milenio a.C.), podrían servir de referente para explicar el uso al que históricamente se han venido sometiendo los recursos del espacio.

Tabla 9. Yacimientos arqueológicos localizados dentro de los límites del Parque Natural.

|                                    |                                                                                             |
|------------------------------------|---------------------------------------------------------------------------------------------|
| <b>Almonte</b>                     | Camino de Bodegones, Asperillo, Chozas de Pichilín, Mata del Difunto y Barco de las Monedas |
| <b>Sanlúcar de Barrameda</b>       | Casa Algaida, Pozo de Monteagudo, Pozo de los Cabrereros y Cerro del Tesorillo.             |
| <b>Villamanrique de la Condesa</b> | Contino, La Zapatera y Pozo de los Infante                                                  |

Es necesario, por último, destacar el Rocío y su romería más allá de la caracterización de ésta como simple actividad turística. Resultan indudables su dimensión y su raigambre en el paisaje humano y cultural de la comarca. En este sentido, la aldea está declarada Bien de Interés Cultural desde 1973, como Paraje Pintoresco, y en la actualidad se está tramitando su incoación como Sitio Histórico.

### 3. OBJETIVOS

Siguiendo las directrices marcadas desde la Unión Europea en los distintos programas de acción en materia de medio ambiente, los objetivos del Plan de Ordenación de Recursos Naturales para el Parque Natural de Doñana se han establecido, por un lado, en el marco del desarrollo sostenible como única forma de compatibilizar los diversos usos y actividades que tienen lugar en el espacio con la conservación de los recursos naturales del mismo y, por otro, en la contribución al establecimiento de la red Natura 2000:

1. Proteger la integridad ecológica y la funcionalidad de los ecosistemas del Parque Natural, garantizando el correcto funcionamiento de los procesos ecológicos que la determinan.
2. Conservar y restaurar la dinámica hidrológica natural que permite la existencia de los sistemas de marisma y lagunares.
3. Garantizar la conservación de la biodiversidad ecológica y de los hábitats y especies de flora y fauna catalogados como de interés comunitario.
4. Mantener y mejorar el estado de las poblaciones de flora y fauna con especial atención a las que están amenazadas.
5. Favorecer el desarrollo socioeconómico de la población y el aprovechamiento sostenible de los recursos naturales, asegurando la compatibilidad de los diferentes aprovechamientos y actividades que se realizan en el Parque Natural con la conservación de los mismos.
6. Mantener la diversidad, la calidad y la integridad del paisaje.
7. Promover y fomentar el uso público y las actividades de turismo activo de forma compatible con la conservación de los recursos naturales y culturales del Parque Natural, con especial atención al tradicional paso de hermandades hacia El Rocío y la romería de La Algaida.
8. Integrar los valores del patrimonio natural y cultural del Parque Natural en el desarrollo de programas educativos que promuevan una conciencia social favorable a la conservación de los mismos.
9. Poner en valor el patrimonio cultural del Parque Natural desde una óptica integrada, como recurso potencial en las políticas de desarrollo sostenible, promoviendo su utilización racional como instrumento de desarrollo cultural y económico siempre que no suponga un menoscabo o deterioro de los valores naturales.
10. Contribuir al conocimiento científico de los elementos del medio natural, las interacciones ecológicas y las afecciones de usos y aprovechamientos, fomentando la investigación que genere resultados aplicables a la gestión.
11. Garantizar el adecuado desarrollo de las edificaciones e infraestructuras que deban ubicarse en el espacio, asegurando su compatibilidad con la conservación de los recursos y su adaptación al entorno.



#### 4. PROPUESTA DE ORDENACIÓN Y ZONIFICACIÓN

##### 4.1. CRITERIOS Y DIRECTRICES GENERALES PARA LA ORDENACIÓN DEL ESPACIO

Una vez establecidos los objetivos, a continuación se concretan las estrategias básicas para alcanzarlos. Estas estrategias van dirigidas a la ordenación de las actuaciones y actividades con incidencia sobre los recursos naturales. No hay que olvidar el papel del Plan de Ordenación de Recursos Naturales como instrumento efectivo para la concreción de la política ambiental andaluza, estructurada a través del Plan de Medio Ambiente de Andalucía.

Las estrategias del presente Plan se materializan en los criterios y directrices recogidos en el presente apartado, y en el establecimiento de la normativa específica para el Parque que se detalla en el apartado 5. Todo ello con la finalidad de establecer una correcta asignación de usos en el territorio, regular el aprovechamiento de los recursos naturales y el desarrollo de las diferentes actividades, y orientar la aplicación de las políticas sectoriales en el espacio natural protegido.

Existe ya un importante acervo normativo y otros instrumentos de desarrollo de las políticas territorial y ambiental, así como de las distintas políticas sectoriales, cuya correcta aplicación coadyuva a alcanzar los objetivos establecidos. Por ello el presente Plan incorpora todos estos elementos ya existentes a los nuevos criterios, directrices y normas, para así articular en torno al espacio una propuesta integral que garantice la conservación de los recursos naturales en el marco de un desarrollo sostenible.

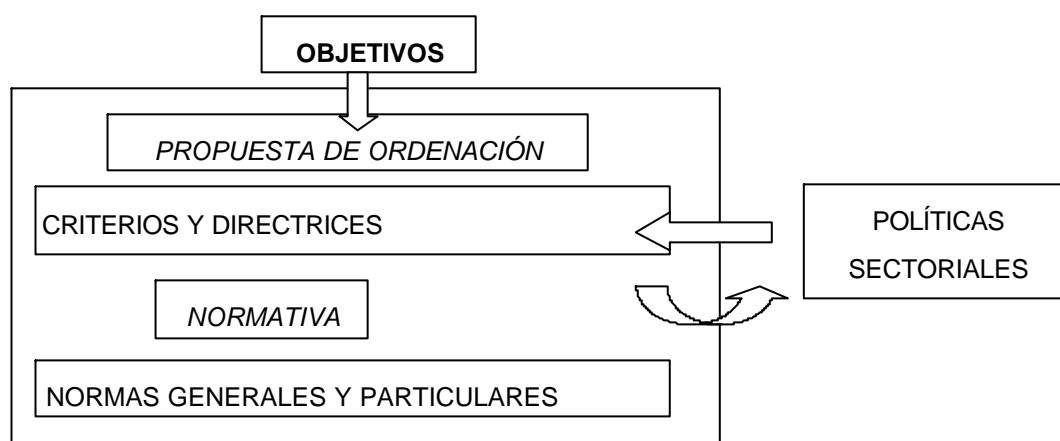

##### 4.1.1 CONSERVACIÓN DE LOS RECURSOS NATURALES Y CULTURALES

En materia de conservación de los recursos naturales y culturales se considera prioritario:

1. Considerar los sistemas hidrológicos en su conjunto, teniendo en cuenta la relación entre marismas, lagunas, cursos de agua, acuíferos y corrientes subterráneas, tanto dentro del Parque Natural como en su entorno.
2. Establecimiento de mecanismos de coordinación y colaboración con el Organismo de Cuenca competente y los Ayuntamientos implicados, para la protección, diagnóstico y seguimiento de los recursos hídricos y sus aprovechamientos.
3. Desarrollo de medidas destinadas a la conservación y protección de las especies endémicas y amenazadas, con preferencia a aquellas que se encuentran recogidas en el Catálogo Andaluz

de Especies Amenazadas, Ley 8/2003, de 28 de octubre, así como aquellas que aún no estando en la situación anterior por sus particulares características sean merecedoras de especial atención en el ámbito del Parque Natural.

4. Priorizar las medidas destinadas a la conservación integral de los ecosistemas, especialmente para asegurar la conservación de los hábitats que estén incluidos en el Anexo I de la Directiva 92/43/CEE, de 21 de mayo, y de las especies contenidas en su Anexo II.
5. Establecer las medidas destinadas a garantizar el paso de las aves migratorias y la reproducción de las aves incluidas en el Anexo I de la Directiva 79/409/CEE, de 2 de abril, *relativa a la conservación de las aves silvestres*.
6. Establecer mecanismos de cooperación con el organismo competente en costas para defender o restaurar la dinámica natural del sector costero del Parque Natural.
7. Conservar y mejorar las formaciones forestales características del espacio, y actuar sobre las de origen artificial buscando el incremento de su diversidad en especies, la regeneración de las que se encuentren degradadas y la eliminación de las especies exóticas.
8. Preservar y restaurar los hábitats singulares, y asegurar la viabilidad de las especies y poblaciones de fauna silvestre.
9. Promover las medidas necesarias para lograr los beneficios derivados de la inclusión de este espacio en la red Natura 2000.
10. Minimizar el riesgo de incendios forestales y los posibles daños causados por los mismos.
11. Conservar los elementos y formaciones geológicas de interés.
12. Para la realización de infraestructuras y edificaciones en el ámbito del Parque Natural, debe prevalecer la restauración o rehabilitación de aquellos elementos del patrimonio edificado ya existentes, y susceptibles de ser utilizados sin merma de su posible valor histórico-artístico.
13. Minimizar el impacto visual de las infraestructuras existentes y procurar la eliminación de aquellas fuera de uso que carezcan de interés cultural.
14. Promover la cooperación y colaboración entre la Consejería de Medio Ambiente, la Consejería de Cultura y la Administración Local.
15. Vincular a los habitantes de la zona con la conservación del medio natural, promoviendo su colaboración mediante los mecanismos que se estimen necesarios.

#### 4.1.2. APROVECHAMIENTO SOSTENIBLE DE LOS RECURSOS

Las actividades primarias tradicionales, vinculadas al aprovechamiento de los recursos naturales del espacio se consideran, con carácter general, elementos esenciales para garantizar la conservación de los mismos, siendo en algunos casos el factor que, modelando el paisaje, ha potenciado los valores naturales del espacio. En ese sentido, se apuesta por su continuidad y se considera prioritario:

1. Integrar la ordenación de usos del suelo y recursos del Parque Natural con la del entorno ecológico del que forma parte, y particularmente con la del Parque Nacional.
2. Promover la elaboración y ejecución de los correspondientes Planes de Ordenación y de Aprovechamiento para todos los montes públicos y privados del Parque Natural.

3. En las áreas pascícolas se evitará la degradación de los pastizales y se acotará aquellas áreas singulares por su flora. En las formaciones adehesadas, el pastoreo deberá ser compatible con el mantenimiento del ecosistema pascícola y, en especial, con la regeneración del arbolado y, en su caso, de especies propias del matorral mediterráneo. Deberá ser asimismo compatible con el bienestar de la fauna autóctona silvestre.
4. La adecuada cooperación y coordinación entre la Consejería de Medio Ambiente y la Consejería de Agricultura y Pesca para:
  - Minimizar el impacto de las actividades ganaderas.
  - Erradicar los aprovechamientos ganaderos no autorizados y ordenar el pastoreo existente de acuerdo con la capacidad del medio y los objetivos de conservación.
  - El desarrollo e impulso de la agricultura y ganadería ecológica, la producción integrada y la agricultura de conservación, así como la adopción del Código de Buenas Prácticas Agrarias, y cualquier otro sistema de aprovechamiento o práctica de manejo sostenible, mediante el desarrollo de técnicas menos agresivas con el medio y que supongan un menor consumo de los recursos.
  - Orientar el adecuado empleo de productos fitosanitarios en terrenos agrícolas a través de normas específicas que la Consejería de Agricultura y Pesca tiene dictadas sobre los productos autorizados y sus condiciones de aplicación a los cultivos, así como la regulación de aquellos que lo precisen.
  - Adoptar estrategias comunes frente a procesos de transformación agraria en el entorno del Parque Natural, así como para fomentar la disminución en el uso de productos fitosanitarios, la introducción de prácticas agrícolas poco agresivas con el medio, la mejora de los sistemas de riego, y la puesta en marcha de medidas destinadas a paliar posibles daños ocasionados por especies protegidas, tanto en las explotaciones agrícolas y acuícolas del Parque Natural como en las de su entorno.
  - Poner en valor los efectos beneficiosos de la agricultura y la ganadería sobre la biodiversidad y el paisaje del Parque Natural y sus valores culturales y etnográficos asociados.
5. Las actividades cinegética y piscícola se ordenarán de forma que sean compatibles con el resto de aprovechamientos en el Parque Natural, así como con su uso público, y que la conservación de las especies singulares no se vea amenazada.
6. La acuicultura existente se desarrollará de forma compatible con la conservación de los recursos naturales, procurando la mayor naturalización posible del medio físico y natural de las áreas en que se desarrolla.
7. Las actividades de recolección de hongos, plantas aromáticas, leñas y otros productos forestales, se llevarán a cabo de manera que ni tales recursos ni el medio forestal se vean degradados.
8. La Consejería de Medio Ambiente promoverá, en coordinación con los organismos competentes en la materia, la concesión de la marca de calidad "Parque Natural de Andalucía" y la "Etiqueta Doñana 21", u otras que estén reconocidas por la Junta de Andalucía, a los productos y servicios procedentes del Parque que cumplan los requisitos exigidos por estas marcas.
9. La cooperación entre la Consejería de Innovación, Ciencia y Empresa y la Consejería de Medio Ambiente para la divulgación de los beneficios que para el espacio puede tener la utilización

racional de las energías renovables, así como para la promoción del uso de las mismas para los usos, actividades y edificaciones dentro del Parque Natural, evitándose así equipamientos de transporte de energía, teniendo en cuenta criterios del mínimo impacto visual y su disponibilidad y desarrollo tecnológico. Todo ello de acuerdo con los objetivos del Plan Energético de Andalucía y la Estrategia Andaluza ante el Cambio Climático.

#### 4.1.3. USO PÚBLICO Y EDUCACIÓN AMBIENTAL

En el desarrollo de las actividades de uso público y de educación ambiental se considera prioritario:

1. La ordenación del uso público en el Parque Natural se debe basar en una visión integral a escala regional, siguiendo los criterios de gestión de la Red de Espacios Naturales Protegidos de Andalucía.
2. El uso público se debe orientar a posibilitar el ocio y disfrute de los ciudadanos, y contribuir a la formación de una conciencia crítica sobre los valores patrimoniales naturales, culturales y etnológicos.
3. El desarrollo del uso público se deberá concretar en el Plan Rector de Uso y Gestión y en el Programa de Uso Público.
4. La educación ambiental se debe orientar a la conservación de la riqueza ecológica y al correcto aprovechamiento de los recursos naturales y culturales de este espacio natural protegido e irá especialmente dirigida a los habitantes de los municipios del Parque Natural.
5. Se buscará la colaboración con el Parque Nacional para el desarrollo de las actividades de uso público y para la coordinación en el uso de los diferentes elementos e infraestructuras destinadas al mismo.
6. Se buscará la coordinación y colaboración con otras Administraciones y la Hermandad Matriz de El Rocío para el correcto desarrollo y tránsito de las hermandades filiales y asociaciones por el Parque Natural. Del mismo modo y a su nivel se actuará con la Romería de La Algaida.

#### 4.1.4. TURISMO EN EL MEDIO RURAL Y TURISMO ACTIVO

Se promoverá la cooperación entre las Consejerías de Medio Ambiente y Turismo, Comercio y Deporte para el adecuado desarrollo de las actividades turísticas, que deberán tener en cuenta las siguientes directrices:

1. Se buscará la compatibilización entre la conservación de los recursos naturales y un adecuado desarrollo de la actividad turística que redunde, desde los puntos de vista social y económico, en beneficio de la población de la zona.
2. La búsqueda del modelo turístico más adecuado para el Parque Natural ha de pasar por la implicación de la población local en el desarrollo y explotación de este recurso, y estará orientada por los siguientes principios:
  - ?? Equilibrar la oferta turística en lo que se refiere a los distintos segmentos de mercado.
  - ?? Potenciar la diversificación de la oferta como respuesta a las nuevas demandas, en especial las del turismo activo.
  - ?? Apoyar la implantación de una oferta turística de calidad compatible con los objetivos del Parque Natural.

?? Promover las iniciativas de carácter autóctono.

3. Las edificaciones vinculadas a actividades de turismo deberán tener características constructivas que las integren en el entorno paisajístico de la zona.

#### 4.1.5. *INVESTIGACIÓN*

En las tareas de investigación se considera prioritario:

1. La compatibilización de las labores de investigación, métodos e infraestructuras asociadas con la conservación y el aprovechamiento de los recursos naturales.
2. El fomento de la investigación sobre aquellos aspectos de mayor interés en el Parque Natural, especialmente los temas relacionados con la conservación de recursos, la ordenación de usos y aprovechamientos, y la gestión del espacio.
3. La colaboración y coordinación entre los diferentes organismos e instituciones dedicados a la investigación sobre este espacio, en particular con la Estación Biológica de Doñana.

#### 4.1.6. *INFRAESTRUCTURAS*

En la creación y el mantenimiento de las diversas infraestructuras se considera prioritario:

1. Se minimizará la afección al Parque Natural de las nuevas infraestructuras que se ejecuten en la zona, así como de la ampliación y mejora de las existentes.
2. Se ha de priorizar el uso o rehabilitación de infraestructuras existentes en el Parque Natural frente al establecimiento de nuevas.
3. Se fomentará el uso en el Parque Natural de tecnologías de bajo impacto ambiental para la construcción y el funcionamiento de las infraestructuras.
4. Se evitará la existencia de infraestructuras energéticas y de comunicaciones en las zonas de reserva (A).
5. Debe evitarse la afección de las infraestructuras a ecotonos y áreas de transición ecológica.
6. Las actuaciones de mejora en la red de caminos del Parque Natural deberán realizarse preferentemente respetando los trazados actuales y evitándose, en cualquier caso, el menoscabo de los valores naturales existentes.

#### 4.1.7. *RÉGIMEN DEL SUELO Y ORDENACIÓN URBANA*

1. El planeamiento urbanístico tendrá en cuenta, a la hora de concretar la clasificación y calificación urbanística del suelo y el establecimiento de sus determinaciones la presencia en su territorio de elementos singulares, tales como:

?? La zonificación establecida para el Parque Natural en el presente Plan.

?? Los cauces públicos, y sus zonas de servidumbre y policía.

?? Las vías pecuarias existentes en el Parque Natural.

?? Los elementos incluidos en los inventarios y catálogos que apruebe la Consejería de Medio Ambiente en orden a garantizar su conservación.

En este sentido, la Consejería de Medio Ambiente facilitará a los Ayuntamientos la información que se encuentre disponible en la Red de Información Ambiental de Andalucía.

2. La demanda de suelo para construcciones destinadas a usos distintos de los establecidos para suelo no urbanizable en la Ley 7/2002, de 7 de diciembre, *de Ordenación Urbanística de Andalucía*, se resolverá preferentemente fuera del Parque Natural.
3. La Consejería de Medio Ambiente colaborará con la Consejería de Obras Públicas y Transportes y las Entidades Locales para garantizar la correcta aplicación de la Ley 7/2002, de 17 de diciembre, *de Ordenación Urbanística de Andalucía*.

#### 4.1.8. CONSTRUCCIÓN, MEJORA, MANTENIMIENTO Y REHABILITACIÓN DE EDIFICACIONES

Como criterios básicos para la ordenación de la actividad edificadora en el Parque Natural se consideran los siguientes:

1. Se fomentará la recuperación de construcciones con valor histórico y patrimonial, además de los elementos etnográficos que constituyan señas de identidad de la población y cultura locales.
2. Se priorizará la rehabilitación de las edificaciones ya existentes frente a la nueva construcción, respetándose en cualquier caso la arquitectura tradicional.
3. Se adecuará la construcción de las nuevas edificaciones en suelo no urbanizable a las necesidades reales existentes, evitando la proliferación indebida de edificaciones en dicho tipo de suelo.
4. Se minimizará la incidencia de las edificaciones sobre la calidad ambiental del entorno.

## 4.2. ZONIFICACIÓN

### 4.2.1. JUSTIFICACIÓN

La zonificación propuesta para el Parque Natural de Doñana tiene como finalidad delimitar distintas zonas sobre las que establecer una ordenación de usos y aprovechamientos específica en cumplimiento en lo dispuesto en el artículo 4.4.c de la Ley 4/1989, de 27 de marzo, *de Conservación de los Espacios Naturales y de la Fauna y Flora Silvestres*.

Esta zonificación se ha obtenido a partir de una valoración ambiental en función de los ecosistemas, hábitats, especies de flora y fauna silvestres, así como de los usos. Así mismo, ha constituido un elemento de obligada referencia la zonificación del PORN anterior.

La delimitación precisa de las distintas zonas es la que aparece recogida en el apartado 8 del presente Plan, cartografía de ordenación.

### 4.2.2. ZONAS DE RESERVA. A

Estas zonas están orientadas preferentemente a la conservación, la investigación, la regeneración ecológica y a la educación ambiental.

Se incluyen en estas zonas aquellos espacios con características naturales sobresalientes, de gran importancia para el sostenimiento de las poblaciones de fauna y flora, así como aquellos que destacan por su singularidad geomorfológica.

Las Zonas de Reserva, que representan un 20,72% de la superficie del Parque Natural (11.155 ha), comprenden las siguientes zonas:

- 1) El Pinto y Moralejo.
- 2) Arroyo de Pilas. Entre las provincias de Sevilla y Huelva.
- 3) Brazo de la Torre.
- 4) Entremuros y Lucio del Cangrejo.
- 5) Ecotono de La Algaida. Franja de transición entre el pinar y la zona de marisma en el sector Este.
- 6) Laguna del Tarelo. Situada en la provincia de Cádiz. Se corresponde con la laguna artificial excavada.
- 7) Médano del Asperillo y Arroyo del Loro. Corresponde a la franja litoral comprendida desde la base del acantilado hasta la carretera A-494, desde la pista de acceso al camping Rocío Playa hasta la margen derecha del arroyo del Loro. Queda excluido el recinto vallado de la Residencia de la Guardia Civil Duque de Ahumada y el antiguo campamento Dunas de Almonte.
- 8) Acantilado y dunas del entorno del Parador Nacional Cristóbal Colón. Zona comprendida entre la base del acantilado y el carril que discurre inmediatamente a sotavento de la duna, desde la margen derecha del arroyo del Loro hasta la margen derecha del arroyo Las Huesas”.
- 9) Complejo Palustre de Ribetehilos y Peladillo.
- 10) Complejo lacustre del Alto Manto Eólico Húmedo (Grupos Lagunares del Sector Oeste). Formaciones lagunares temporales de carácter generalmente endorréico en la zona de El Abalario.
- 11) Complejo palustre de Lagunas de Moguer y Pino Galé.
- 12) Finca El Acebuche, excepto la zona de equipamientos e instalaciones.

#### 4.2.3. ZONAS DE REGULACIÓN ESPECIAL. B

Los objetivos para estas zonas están encaminados al mantenimiento del sistema mediante aprovechamientos tradicionales de carácter extensivo, compatibilizando la actividad productiva con la conservación de la biodiversidad.

Son áreas de indudables valores ecológicos, científicos, culturales y paisajísticos, que presentan diversos grados de transformación antrópica, resultado de aprovechamientos primarios, compatibles en su estado actual con la preservación de los valores que se pretende proteger.

Estas Zonas de Regulación Especial, que representan un 71,53% de la superficie del Parque Natural (38.507 ha), se agrupan en función de sus características, en tres:

#### 4.2.3.1. "Terrenos de monte". Zonas B1

Se incluyen:

- 1) Pinares de Propios de Hinojos. Superficie de los Montes Propios de Hinojos incluida en el Parque Natural.
- 2) Pinares y Dehesa de Gato. En Villamanrique de la Condesa.
- 3) La Juncosilla y masa forestal de Hato Ratón Cotos I y II. Corresponde a una masa de pinar y alcornocal, situada en los términos municipales de Villamanrique de la Condesa y Aznalcázar.
- 4) Terreno Forestal de Coto del Rey. Situada en el término municipal de Hinojos, dentro de los actuales límites del Parque Natural, y no incluida en otras zonas.
- 5) Pinar de la Algaida. Corresponde a la masa de pinar de Sanlúcar de Barrameda.
- 6) Pinares de El Abalarío. Resto del Sector Oeste, no incluido en las zonas anteriores.
  
- 7) Franja litoral del entorno del Parador Nacional Cristóbal Colón. Zona comprendida entre el carril que discurre a sotavento de la duna y la carretera A-494, desde la margen derecha del arroyo del Loro hasta la margen derecha del arroyo Las Huesas. Quedan excluidos los recintos vallados del camping Doñana, del Campamento Militar de Arenosillo (INTA) y del Parador Nacional de Cristóbal Colón, así como las instalaciones de la Consejería de Medio Ambiente y el poblado forestal de Mazagón.
- 8) Antiguo campamento Dunas de Almonte. Se corresponde con el recinto vallado del antiguo campamento Dunas de Almonte.

Representan el 38,94% de la superficie del Parque Natural (20.965 ha).

#### 4.2.3.2. "Marisma no explotada". Zona B.2

Incluye:

- 9) Marismas sin transformar y marisma drenada sin uso agrícola. Corresponde a la Marisma Gallega de Hinojos, marisma de la finca Marisma y Lomo del Grullo, a una pequeña zona sin transformar en Hato Blanco, a la marisma de Henares de Sanlúcar de Barrameda, a la marisma de Tierras Bajas, marisma sin transformar de Veta la Palma y otras de las mismas características, salvo los terrenos incluidos en otra zonificación.
- 10) Caño Guadiamar.
- 11) Finca Huerta Tejada. Se corresponde con los límites de la citada finca, propiedad de la Consejería de Medio Ambiente.
- 12) Marisma mareal restaurada y salinas tradicionales sin actividad en el Sector Sur.

Representan el 19,83% de la superficie del Parque Natural (10.674 ha).



#### 4.2.3.3. "Marisma explotada". Zona B.3

Incluye:

- 13) Arrozales y zona de cereal de Hato Blanco.
- 14) Arrozales y explotaciones acuícolas de Veta la Palma. Corresponde a la zona de arrozal y a la zona de cultivos marinos.
- 15) Salinas de Sanlúcar de Barrameda.

Representan el 12,76% de la superficie del Parque Natural (6.868 ha).

#### 4.2.4. ZONAS DE REGULACIÓN COMÚN. C

Los objetivos para estas zonas se dirigen hacia la prevención y corrección de los impactos que las actividades desarrolladas en ellas puedan causar sobre el conjunto de los recursos y ecosistemas del territorio, así como a la restauración de las áreas degradadas y a favorecer las externalidades positivas de los diversos usos que se desarrollan en el espacio.

Corresponden a aquellos espacios donde se muestra con mayor intensidad la intervención humana, presentando diversos grados de transformación de sus valores naturales, estando destinados en su mayor parte al aprovechamiento agrícola o ganadero.

Estas Zonas de Regulación común, que representan el 7,75% de la superficie del Parque Natural (4.173 ha), se agrupan de acuerdo con sus diferentes características, en tres:

##### 4.2.4.1. Cultivos agrícolas. Zona C.1

Se incluyen en estas zonas:

- 1) Hato Ratón, zona agrícola de Coto I de Hato Ratón, La Torera y zona agrícola de Hato Blanco sin arrozal.
- 2) La Zapatera, El Cortijillo y La Calera.
- 3) Parcelas agrícolas de La Palmosa.
- 4) Sector norte de Veta la Palma.
- 5) Fincas El Álamo y La Veguilla.

Representan el 7,03% de la superficie del Parque Natural (3.783 ha).

##### 4.2.4.2. Áreas con edificaciones. Zona C.2

Incluyen:

- 6) Residencia Guardia Civil. Se corresponde con el recinto vallado de la Residencia de la Guardia Civil.
- 7) Camping Doñana. Se corresponde con el recinto vallado del camping Doñana.
- 8) Antiguo Campamento Dunas de Almonte. Situado entre la carretera de acceso al Cuartel de la Guardia Civil del Loro y el límite occidental de la zona militar Médano del Loro.
- 9) Campamento Militar de Arenosillo (INTA). Se corresponde con el recinto vallado del

Campamento Militar de Arenosillo (INTA).

- 10) Parador Nacional de Cristóbal Colón. Se corresponde con el recinto vallado del Parador Nacional de Cristóbal Colón.
- 11) Instalaciones de la Consejería de Medio Ambiente. Incluye casa forestal, talleres y naves, así como la adecuación recreativa de Mazagón.
- 12) Poblado forestal de Mazagón. Se corresponde con el área ocupada por el citado poblado”.
- 13) Poblado forestal de El Abalarío.
- 14) Edificaciones e instalaciones de El Acebuche.

Representan el 0,67% de la superficie del Parque Natural (361 ha).

#### 4.2.4.3 *Explotación acuícola intensiva. Zona C.3*

Comprende:

- 15) Explotación acuícola intensiva de San Carlos. Corresponde exclusivamente a la zona de cultivos marinos.

Representan el 0,05% de la superficie del Parque Natural (29 ha).

## MAPA SÍNTESIS DE LA ZONIFICACIÓN

(Ver anexo cartográfico en [www.juntadeandalucia.es/medioambiente](http://www.juntadeandalucia.es/medioambiente))

## **5. NORMATIVA**

### **5.1. VIGENCIA, ADECUACIÓN Y EVALUACIÓN**

#### **5.1.1. VIGENCIA**

El presente Plan tendrá una vigencia indefinida.

#### **5.1.2. ADECUACIÓN**

1. Durante su vigencia, el contenido del Plan podrá ser sometido a modificación de alguna o algunas de las partes que lo constituyen, o a un procedimiento de revisión del conjunto del mismo.
2. Modificación.
  - a) La modificación del Plan supone cambios concretos de alguno o algunos de sus contenidos, tratándose de ajustes puntuales que no alteran sustancialmente la ordenación adoptada.
  - b) El Plan podrá ser modificado a propuesta de la Consejería de Medio Ambiente, bien a iniciativa propia o por acuerdo motivado del órgano colegiado de participación competente, aprobado por mayoría absoluta de sus miembros. La modificación será sometida al trámite simultáneo de información pública y audiencia a los intereses sociales e institucionales implicados.
  - c) La aprobación de la modificación corresponderá al titular de dicha Consejería cuando se refiera únicamente a materias competencia de medio ambiente, y al Consejo de Gobierno en los demás casos.
3. Revisión.
  - a) La revisión del Plan implica un examen del mismo en su conjunto como consecuencia de la constatación de nuevas circunstancias ambientales o socioeconómicas, avances o nuevos descubrimientos científicos u otras causas legalmente justificadas y lleva implícito el establecimiento de una nueva ordenación.
  - b) El Plan podrá ser revisado por Acuerdo del Consejo de Gobierno de la Junta de Andalucía a propuesta de la Consejería de Medio Ambiente, bien a iniciativa propia o por acuerdo motivado del órgano colegiado de participación competente, aprobado por mayoría absoluta de sus miembros.
  - c) La revisión se llevará a cabo siguiendo los mismos trámites establecidos para su elaboración y aprobación.
4. Adaptación.

No se considera revisión ni modificación cualquier adaptación literaria o gráfica de sus límites como consecuencia de los avances tecnológicos que se puedan producir en la información gráfica relativa al espacio, o para su adecuación a escalas cartográficas más detalladas.

### 5.1.3. EVALUACIÓN

El presente Plan se evaluará, a partir de su entrada en vigor, cada diez años. Para ello se tendrá en cuenta el sistema de indicadores establecidos en el apartado 7.

### 5.2. RÉGIMEN DE PREVENCIÓN AMBIENTAL

1. En el ámbito del presente Plan y en materia de prevención ambiental se estará a lo dispuesto en la Ley 7/1994, de 18 de mayo, de protección ambiental, y demás normativa vigente sobre dicha materia.
2. Los procedimientos de prevención ambiental deberán tener en cuenta obligatoriamente las determinaciones fijadas en el presente Plan.
3. Igualmente los procedimientos de prevención ambiental deberán evaluar las consecuencias que las actividades, planes o proyectos a desarrollar tengan sobre el estado de conservación de los hábitats naturales y/o las especies que estén incluidos en la Directiva 92/43/CEE, del Consejo, de 21 de mayo, *relativa a la conservación de los hábitats naturales y de la fauna y flora silvestres*, en la Directiva 79/409/CEE, del Consejo, de 2 de abril, *relativa a la conservación de las aves silvestres*, y que han motivado la designación de este espacio como Zona de Especial Protección para las Aves y su inclusión en la propuesta de Lugares de Importancia Comunitaria.
4. De acuerdo con lo establecido en el artículo 6.3 de la Directiva 92/43/CEE, del Consejo, de 21 de mayo, y en el artículo 6.3. del Real Decreto 1997/1995, de 7 de diciembre, *por el que se establecen medidas para contribuir a garantizar la biodiversidad mediante la conservación de los hábitats naturales y de la fauna y flora silvestres*, cualquier actividad, plan o proyecto no contemplado en el régimen general de prevención ambiental y que sin tener relación directa con la gestión del espacio pueda afectar de forma apreciable al mismo, se someterá a una adecuada evaluación de sus repercusiones ambientales sobre los hábitats naturales y/o las especies y los hábitats de éstas que han motivado la designación de este espacio como Zona de Especial Protección para las Aves y su inclusión en la propuesta de Lugares de Importancia Comunitaria.

### 5.3. NORMAS GENERALES

1. Las siguientes normas son de aplicación en todo el ámbito del Parque Natural, sin perjuicio de lo dispuesto para cada una de las zonas del mismo en su correspondiente normativa particular.
2. De conformidad con lo establecido en el artículo 16 de la Ley 2/1989, de 18 de julio, las autorizaciones a otorgar por la Consejería de Medio Ambiente que se requieran en virtud del presente Plan, cuando tuvieran por objeto actividades sujetas a autorización o licencia municipal de obras, se instarán en el mismo acto de solicitud de éstas, siguiendo para ello el procedimiento establecido en el citado artículo.

#### 5.3.1. ACTIVIDADES Y APROVECHAMIENTOS FORESTALES

1. Los usos y aprovechamientos de los montes en el Parque Natural, cualquiera que sea su titularidad, se regirán por lo dispuesto en la normativa vigente y las disposiciones establecidas en el presente Plan y en el Plan Rector de Uso y Gestión.
2. Sin perjuicio de lo establecido en la citada normativa, requerirá autorización de la Consejería de Medio Ambiente:
  - a) La instalación de infraestructuras de carácter forestal y las labores de mantenimiento, ampliación o mejora de las infraestructuras forestales existentes.

- b) La eliminación de vegetación de márgenes de cursos de agua y lagunas.
  - c) La reintroducción, siembra, transplante u otro tipo de propagación de especies de la flora silvestre autóctonas.
  - d) En lo no previsto por la normativa vigente, la recolección de especies vegetales aromáticas, medicinales, para condimento u otros usos tradicionales.
  - e) La recolección de otras especies de flora silvestre y de sus propágulos, restos o cualquier otra parte.
  - f) El aprovechamiento de eneas, castañuelas y juncos, que se autorizarán en todo caso fuera de la época de nidificación de aves acuáticas.
3. Los usos y aprovechamientos en terrenos forestales privados, incluidos los enumerados en el apartado 2, que expresamente estén contemplados en Proyectos de Ordenación o Planes Técnicos aprobados por la Consejería de Medio Ambiente, se regirán por lo establecido en el artículo 99 del Decreto 208/1997, de 9 de septiembre, por el que se aprueba el Reglamento Forestal de Andalucía.

### 5.3.2. ACTIVIDADES AGRÍCOLAS

- 1. Las actividades agrícolas se desarrollarán de acuerdo con la normativa vigente, además de las disposiciones establecidas en el presente Plan y en el Plan Rector de Uso y Gestión.
- 2. Necesitarán autorización de la Consejería de Medio Ambiente:
  - a) Todas las actuaciones ligadas a la explotación agrícola no consideradas como prohibidas que afecten al dominio público hidráulico de cursos de agua.
  - b) Las obras de modificación y mejora de caminos y muros.
  - c) La creación de nuevas infraestructuras hidráulicas para uso agrícola.
  - d) Los trabajos selvícolas en enclaves forestales situados en las parcelas agrarias.
  - e) Las transformaciones agrarias que impliquen incremento en el consumo de fertilizantes y/o productos fitosanitarios.
- 3. Se prohíbe:
  - a) La transformación de marismas para su cultivo.
  - b) La roturación de terrenos de monte para su puesta en cultivo.
  - c) La puesta en cultivo de las marismas antiguamente transformadas y nunca explotadas.
  - d) Las transformaciones agrarias que impliquen un incremento en el consumo de agua, salvo que la superficie cultivada de regadío se reduzca de forma proporcional para que tal incremento no se produzca.
  - e) El vertido e incineración de residuos sólidos procedentes de la actividad agrícola.
  - f) La eliminación de setos vivos a lo largo de caminos y lindes de parcelas, y de las especies forestales de taludes y áreas marginales de las fincas agrarias, salvo cuando invadan las parcelas de cultivo.

- g) La supresión de manchas, grupos o pies aislados de especies forestales arbóreas o arbustivas dispersas por las fincas agrarias.

### 5.3.3. APROVECHAMIENTOS GANADEROS

1. Los aprovechamientos ganaderos se desarrollarán de acuerdo con las disposiciones vigentes, los instrumentos de ordenación y planificación aprobados para el ámbito del Parque Natural, además de las determinaciones establecidas en el presente Plan y en el Plan Rector de Uso y Gestión.
2. Necesitará autorización de la Consejería de Medio Ambiente:
  - a) El aumento temporal de la carga ganadera sobre lo establecido en el correspondiente plan de aprovechamiento o documento de gestión ganadera aprobado.
  - b) Las actuaciones de mejora de los pastizales naturales.
3. Se prohíbe:
  - a) La ganadería intensiva e instalaciones ligadas a la misma.
  - b) La roturación y la quema de vegetación forestal para la obtención de pastos, salvo por necesidad ineludible para el desarrollo de las actividades de gestión del Parque Natural.
4. La Consejería de Medio Ambiente, en aquellas fincas dedicadas a la ganadería donde se hayan detectado problemas de sobreexplotación de la vegetación o de erosión del suelo, podrá limitar la carga ganadera o establecer un acotamiento temporal hasta que se alcancen valores que no pongan en peligro el mantenimiento de estos recursos. No se considerarán estas medidas cuando las circunstancias climatológicas hayan sido adversas para la producción de pastos y los daños no se consideren irreparables.

### 5.3.4. ACTIVIDADES CINEGÉTICAS Y PISCÍCOLAS

1. Las actividades cinegéticas y piscícolas se desarrollarán de acuerdo con las disposiciones vigentes, los instrumentos de ordenación de la caza y de la pesca que se aprueben para el ámbito del Parque Natural, además de las determinaciones establecidas en el presente Plan y en el Plan Rector de Uso y Gestión.
2. Necesitarán autorización de la Consejería de Medio Ambiente las labores de repoblación cinegética o piscícola.
3. Se prohíbe:
  - a) Los escenarios de caza en cotos y las granjas cinegéticas.
  - b) La caza del conejo cuando se detecten situaciones de baja densidad poblacional de la especie.
  - c) La introducción, suelta y repoblación con especies cinegéticas no autóctonas.

### 5.3.5. USO PÚBLICO, EDUCACIÓN AMBIENTAL, TURISMO EN EL MEDIO RURAL Y TURISMO ACTIVO

1. El desarrollo de actividades de turismo en el medio rural, de turismo activo y de ecoturismo por parte de empresas se regirá por la normativa vigente, en particular por lo establecido en el Decreto 20/2002, de 29 de enero, de Turismo en el Medio Rural y Turismo Activo y en la Orden

de 20 de marzo de 2003, conjunta de las Consejerías de Turismo y Deporte y de Medio Ambiente, por la que se establecen las obligaciones y condiciones medioambientales para la práctica de las actividades integrantes del turismo activo, y las disposiciones establecidas en el presente Plan y en el Plan Rector de Uso y Gestión.

2. Todas aquellas actividades organizadas por empresas y no comprendidas en el apartado anterior, requerirán autorización previa de la Consejería de Medio Ambiente.
3. Requerirán autorización previa de la Consejería de Medio Ambiente las actividades, a iniciativa de particulares o de asociaciones para sus asociados, que se citan a continuación:
  - a) Actividades ecuestres, ciclismo y senderismo en Zonas de Reserva (A), salvo en los itinerarios ofertados por la Consejería de Medio Ambiente para cada tipo de actividad.
  - b) Circulación de vehículos a motor en actividades vinculadas al uso público, en Zonas de Reserva (A).
  - c) Caravanas organizadas de 4 ó más vehículos a motor.
  - d) Cualquier actividad permitida que se realice fuera de los equipamientos básicos y complementarios que requiera la instalación de dotaciones, incluso cuando éstas sean provisionales.
  - e) La realización de cualquier tipo de competición deportiva, prueba o exhibición organizada.
  - f) Acampadas o campamentos juveniles de los contemplados en el Decreto 45/2000, de 31 de enero, *sobre la organización de acampadas y campamentos juveniles de Andalucía*.
  - g) El tránsito para la realización de actividades de educación ambiental por caminos de acceso restringido por motivos de conservación.
  - h) La instalación de infraestructuras y equipamientos permanentes para el uso público, el turismo en el medio rural y turismo activo o la educación ambiental.
  - i) Aquellas romerías o concentraciones de carácter popular que hayan comenzado a tener lugar durante los últimos 10 años o se vayan a iniciar en el futuro.
4. Las Consejerías de Turismo, Comercio y Deporte y de Medio Ambiente podrán regular mediante Orden conjunta, las obligaciones y condiciones medioambientales para la práctica de aquellas actividades que en el futuro sean declaradas como actividades de turismo activo o de ecoturismo.
5. Los recorridos actuales de las hermandades y asociaciones rocieras dentro del Parque Natural podrán modificarse por motivos de conservación.
6. La Consejería de Medio Ambiente podrá limitar, condicionar o someter a autorización, de forma cautelar e inmediata, por un tiempo determinado o de manera permanente, el desarrollo de cualquier tipo de actividad en un determinado lugar, cuando existan razones justificadas.
7. Queda prohibido en el Parque Natural:
  - a) La circulación de vehículos terrestres a motor por caminos rurales de anchura inferior a 2 metros, por zonas de servidumbre del dominio público hidráulico, por cortafuegos y fajas auxiliares, por vías de saca forestales y por cauces secos o inundados.



- b) La circulación de bicicletas y vehículos a motor campo a través o fuera de los caminos permitidos.
- c) Las actividades aeronáuticas, con o sin motor, por debajo de 1.000 metros de altura sobre la vertical del terreno.
- d) Actividades de orientación en Zonas de Reserva (A).
- e) La circulación de quads vinculada a actividades de uso público.
- f) Los tránsitos rocieros de nuevas hermandades que no pertenezcan a ningún municipio del entorno del Parque Natural.
- g) La apertura de nuevos caminos e itinerarios rocieros, excepto cuando sea necesario modificar los ya existentes por motivos de conservación.

#### 5.3.6. *ACTIVIDADES DE INVESTIGACIÓN*

1. Las actividades de investigación se desarrollarán de acuerdo con la normativa vigente y las disposiciones establecidas en el presente Plan y en el Plan Rector de Uso y Gestión.
2. Necesitarán autorización de la Consejería de Medio Ambiente:
  - a) Los trabajos de campo para el desarrollo de investigaciones.
  - b) La difusión de información derivada de la investigación desarrollada en el Parque Natural, cuando pueda comprometer o poner en peligro a las poblaciones o individuos de especies amenazadas, o los recursos naturales.
  - c) Cualquier actuación que sea consecuencia del trabajo de campo como la instalación de infraestructuras y el tránsito fuera de las infraestructuras viarias del parque natural, entre otras.
3. Quedan prohibidas las actividades de investigación que impliquen un grave deterioro, temporal o permanente, de los valores naturales o culturales.

#### 5.3.7. *CONSTRUCCIÓN, MEJORA Y MANTENIMIENTO DE INFRAESTRUCTURAS*

1. La construcción, mejora y mantenimiento de infraestructuras se desarrollará de acuerdo con la normativa vigente y las disposiciones establecidas en el presente Plan y en el Plan Rector de Uso y Gestión.
2. Requerirá autorización previa de la Consejería de Medio Ambiente la construcción o instalación de:
  - a) Elementos para contemplación del paisaje u observación de fauna.
  - b) Estaciones o sistemas de depuración de aguas residuales y redes de saneamiento, en los núcleos de población, viviendas aisladas e instalaciones en suelo no urbanizable.
  - c) Conducciones de agua, balsas y otros elementos de riego, regulación o abastecimiento hídrico.
  - d) Equipamientos para los sistemas de transportes de energía, incluidos los tendidos eléctricos y conducciones de gas.

- e) Las instalaciones de suministro de energía a obras o edificios existentes o proyectados.
  - f) Antenas, líneas y demás elementos de telefonía y comunicaciones.
  - g) Apertura de pistas forestales; ensanche o modificación del trazado de las existentes.
  - h) Vallados y cerramientos de cualquier tipo.
3. Para la ejecución de nuevas infraestructuras en sustitución de otras obsoletas, deberá procederse al desmantelamiento de las instalaciones que han quedado en desuso.
4. Quedan prohibidos en el ámbito determinado por los límites del Parque Natural:
- a) La instalación de vertederos y depósitos de almacenaje de residuos urbanos o industriales.
  - b) Los pozos ciegos.
  - c) Los parques eólicos.
  - d) La instalación de nuevos aeropuertos, aeródromos y helipuertos, salvo las instalaciones aeronáuticas destinadas a los servicios públicos esenciales, las urgencias médicas y los destinados a la lucha contra incendios forestales.
  - e) La apertura de nuevas carreteras y el ensanche o las variaciones del trazado de las existentes.
  - f) El asfaltado del firme de caminos forestales o agrícolas, no estando comprendidas en esta prohibición las labores de mantenimiento de los existentes.

#### 5.3.8. CONSTRUCCIÓN, MEJORA, MANTENIMIENTO Y REHABILITACIÓN DE EDIFICACIONES

1. La construcción, mejora, mantenimiento y rehabilitación de las edificaciones en el Parque Natural se realizará conforme a la normativa vigente y a las disposiciones del presente Plan y del Plan Rector de Uso y Gestión.
2. De acuerdo con lo establecido en el Plan de Ordenación del Territorio del Ámbito de Doñana (POTAD), Decreto 341/2003, de 9 de diciembre y a efectos de su clasificación por el planeamiento urbanístico, el Parque Natural tendrá la consideración de suelo no urbanizable de especial protección.
3. Los planeamientos urbanísticos deberán establecer:
  - a) Las parcelas mínimas para las edificaciones en suelo no urbanizable. Para ello se tendrá en cuenta que dichas edificaciones han de justificar su necesidad para el desarrollo de la actividad agraria, por lo que la parcela mínima deberá ser superior a la superficie mínima de explotación necesaria para garantizar su viabilidad.
  - b) Las distancias mínimas a otras edificaciones, a linderos, cauces y suelo urbano, para evitar el deterioro de los recursos naturales y paisajísticos, así como la posible formación de núcleos urbanos.
4. De conformidad con lo establecido en la Ley 7/2002, de 17 de diciembre, de Ordenación Urbanística de Andalucía, en el ámbito del Parque Natural se entenderán por construcciones o instalaciones adecuadas y ordinarias para la utilización y explotación agrícola, ganadera,

forestal y cinegética, o análoga, a que estén adscritos los terrenos, las instalaciones o dependencias que a continuación se relacionan:

- a) Las naves e instalaciones vinculadas al almacenamiento y manipulación de productos o residuos agrícolas y forestales, naves para maquinaria, aperos e infraestructuras móviles.
  - b) Las instalaciones destinadas al mantenimiento de la cabaña ganadera, tales como apriscos, cerramientos, instalaciones destinadas al refugio, saneamiento y manejo del ganado, construcciones para almacenamiento de forrajes y otras.
  - c) Las instalaciones para el manejo y la gestión de la fauna cinegética y piscícola.
  - d) Las casetas de aperos y construcciones para el establecimiento de pequeñas instalaciones de servicio, como bombas, generadores o transformadores.
5. La vivienda familiar vinculada a la explotación de los recursos agrarios de la finca será la destinada a la residencia del titular de la explotación, o al personal laboral vinculado a la misma.
6. Necesitará autorización de la Consejería de Medio Ambiente:
- a) La construcción y rehabilitación de edificaciones.
  - b) Las obras de mejora y mantenimiento de edificaciones cuando supongan un aumento del volumen edificado.
  - c) Los cambios de uso para edificaciones y viviendas cuyo objetivo sea su adecuación o transformación para actividades de turismo en el medio rural.
7. Queda prohibida la colocación o instalación con carácter permanente de edificios portátiles, caravanas o "containers", así como los contruidos con materiales de desecho.

#### 5.3.9. OTROS USOS Y ACTIVIDADES

1. Los usos y actividades no recogidos en los apartados anteriores se desarrollarán de acuerdo con las disposiciones vigentes sobre las respectivas materias, además de las determinaciones establecidas en el presente Plan y en el Plan Rector de Uso y Gestión.
2. Necesitarán autorización de la Consejería de Medio Ambiente:
  - a) La captura de ejemplares de la fauna silvestre.
  - b) La introducción de ejemplares de fauna silvestre autóctona con cualquier finalidad.
  - c) Los movimientos de tierra vinculados a actividades no sometidas a autorización.
  - d) Las captaciones de agua, superficiales o subterráneas.
  - e) La ejecución de cualquier obra o trabajo en la zona de policía de cauces.
  - f) La realización de nuevas canalizaciones, obras de drenaje y muros, así como la rehabilitación y reforma de los que hubieran quedado en desuso.
  - g) Las obras de creación de nuevas estructuras ligadas a las explotaciones acuícolas o a las salineras así como las de modificación y mejora de las existentes que en todo caso se realizarán fuera de la época de nidificación.

- h) Las nuevas actividades de investigación y el aprovechamiento de los yacimientos minerales y demás recursos geológicos no expresamente prohibidos en el presente Plan.
  - i) La realización de actividades profesionales cinematográficas y fotográficas como rodajes de películas, reportajes gráficos o anuncios publicitarios.
3. Queda prohibido:
- a) La extracción de áridos y la minería a cielo abierto.
  - b) La realización de obras o actuaciones que obstaculicen o impidan el libre tránsito de la fauna a los puntos habituales de agua.
  - c) Toda actividad que suponga la destrucción o alteración irreversible del patrimonio geológico, de las formaciones geológicas o de los yacimientos paleontológicos, o el incremento de la erosión del suelo.
4. La Consejería de Medio Ambiente podrá restringir el acceso de personas a las zonas con presencia de especies de fauna incluidas en las categorías “en peligro de extinción” o “vulnerables”, según la normativa vigente, durante las épocas de reproducción, sin menoscabo de los derechos inherentes a la propiedad de los terrenos.

#### **5.4. NORMAS PARTICULARES**

##### **5.4.1. ZONAS DE RESERVA. ZONAS A**

1. De acuerdo con los objetivos y propuesta de ordenación, y en los términos establecidos en la normativa general, se consideran compatibles los siguientes usos y actividades:
- a) Actividades de investigación.
  - b) Actuaciones encaminadas a la conservación o la regeneración de los hábitats, ecosistemas o de especies autóctonas.
  - c) Tratamientos selvícolas para conservación y regeneración de formaciones forestales, o para eliminación de especies exóticas.
  - d) La recolección de piñas, setas, plantas aromáticas o medicinales, castañuela, caracoles y cabrillas.
  - e) La apicultura.
  - f) Actividades de uso público, turismo activo y de educación ambiental utilizando las infraestructuras existentes para ello, salvo autorización expresa de la Consejería de Medio Ambiente.
  - g) La instalación de equipamientos e infraestructuras de uso público, educación ambiental, así como las ligadas a la conservación y gestión del espacio natural protegido.
  - h) Las actividades rocieras que se vienen desarrollando en la zona de El Pinto y Moralejo, y en el Sector Oeste.
2. De acuerdo con los objetivos y propuesta de ordenación, y en los términos establecidos en la normativa general, se consideran incompatibles los siguientes usos y actividades:

- a) Los movimientos de tierra y alteraciones hidráulicas.
  - b) El cultivo agrícola, salvo en las explotaciones existentes en la ribera del arroyo de Pilas.
  - c) Los aprovechamientos ganaderos.
  - d) La caza.
  - e) La pesca.
  - f) La construcción de nuevas infraestructuras y edificaciones de cualquier tipo, excepto las vinculadas al uso público, educación ambiental, o a la conservación y gestión del espacio natural protegido.
  - g) Los cerramientos, salvo los necesarios para la protección de la flora o la fauna.
  - h) Las nuevas actividades de investigación y el aprovechamiento de los yacimientos minerales y demás recursos geológicos.
  - i) Cualquier otra actuación que en el correspondiente procedimiento de autorización así se determine en los términos establecidos en la normativa que resulte de aplicación.
3. Las actividades militares únicamente estarán permitidas dentro de los límites del polígono de tiro de "Médano del Loro".

#### 5.4.2. ZONAS DE REGULACIÓN ESPECIAL. ZONAS B

##### 5.4.2.1. Terrenos de Monte. Zonas B.1

- 1. Las normas particulares establecidas para esta Zona de Regulación Especial B.1 serán de aplicación también para las manchas de vegetación forestal existentes en las Zonas de Regulación Común C, aunque por su reducido tamaño no aparezcan representadas en la cartografía de ordenación.
- 2. De acuerdo con los objetivos y propuesta de ordenación, y en los términos establecidos en la normativa general, se consideran compatibles los siguientes usos y actividades:
  - a) Actividades de investigación.
  - b) Actuaciones encaminadas a la conservación o a la regeneración de los hábitats, ecosistemas o de especies autóctonas.
  - c) Aprovechamientos forestales en general.
  - d) Tratamientos selvícolas para conservación y regeneración de formaciones forestales, o para eliminación de especies exóticas.
  - e) La recolección de piñas, setas, plantas aromáticas o medicinales, castañuela, caracoles y cabrillas.
  - f) Los aprovechamientos agrarios en los pequeños enclaves de cultivos tradicionales existentes en Dehesa del Gato.
  - g) La ganadería extensiva.
  - h) La caza.

- i) La apicultura.
  - j) Actividades de uso público, turismo activo y educación ambiental.
  - k) Instalación de equipamientos e infraestructuras de uso público, educación ambiental, así como las ligadas a la conservación y gestión del espacio natural protegido.
  - l) Cualquier otra actuación que el correspondiente procedimiento de autorización determine como compatible en los términos establecidos en la normativa que resulte de aplicación.
3. De acuerdo con los objetivos y propuesta de ordenación, y en los términos establecidos en la normativa general, se considera incompatible cualquier actuación que en el correspondiente procedimiento de autorización así se determine en los términos establecidos en la normativa que resulte de aplicación.

#### 5.4.2.2. *Marisma No Explotada. Zonas B.2*

1. De acuerdo con los objetivos y propuesta de ordenación, y en los términos establecidos en la normativa general, se consideran compatibles los siguientes usos y actividades:
- a) Actividades de investigación.
  - b) Actuaciones encaminadas a la conservación o la regeneración de los hábitats, ecosistemas, o de especies autóctonas.
  - c) Aprovechamiento de castañuela, caracoles, cabrilla y otras especies recolectadas tradicionalmente.
  - d) Actividades de uso público, turismo activo y educación ambiental.
  - e) Instalación de equipamientos e infraestructuras de uso público y de educación ambiental, así como las ligadas a la conservación y gestión del espacio natural protegido.
  - f) La ganadería extensiva.
  - g) La caza y la pesca.
  - h) Cualquier otra actuación que el correspondiente procedimiento de autorización determine como compatible en los términos establecidos en la normativa que resulte de aplicación.
2. De acuerdo con los objetivos y propuesta de ordenación, y en los términos establecidos en la normativa general, se considera incompatible cualquier actuación que en el correspondiente procedimiento de autorización así se determine en los términos establecidos en la normativa que resulte de aplicación.

#### 5.4.2.3. *Marisma Transformada. Zonas B.3*

1. De acuerdo con los objetivos y propuesta de ordenación, y en los términos establecidos en la normativa general, se consideran compatibles los siguientes usos y actividades:
- a) Actividades de investigación.
  - b) Actuaciones encaminadas a la conservación o regeneración de los hábitats, ecosistemas, o de especies autóctonas.

- c) Aprovechamiento de castañuela, caracoles, cabrilla y otras especies recolectadas tradicionalmente.
  - d) Cultivo agrícola en las explotaciones existentes.
  - e) La ganadería extensiva.
  - f) La acuicultura existente.
  - g) La actividad salinera existente.
  - h) Actividades de uso público, turismo activo y educación ambiental.
  - i) Instalación de equipamientos e infraestructuras de uso público y educación ambiental, así como las ligadas a la conservación y gestión del espacio natural protegido.
  - j) La pesca.
  - k) La caza, salvo en las explotaciones acuícolas y donde así esté determinado.
  - l) Cualquier otra actuación que el correspondiente procedimiento de autorización determine como compatible en los términos establecidos en la normativa que resulte de aplicación.
2. De acuerdo con los objetivos y propuesta de ordenación, y en los términos establecidos en la normativa general, se considera incompatible la desecación de los terrenos encharcados para su transformación a otros usos, así como cualquier otra actuación que en el correspondiente procedimiento de autorización así se determine en los términos establecidos en la normativa que resulte de aplicación.

#### 5.4.3. ZONAS DE REGULACIÓN COMÚN. ZONAS C

##### 5.4.3.1. Cultivos Agrícolas. Zonas C.1

1. De acuerdo con los objetivos y propuesta de ordenación, y en los términos establecidos en la normativa general, se consideran compatibles los siguientes usos y actividades:
- a) Actividades de investigación.
  - b) Actuaciones encaminadas a la regeneración de los hábitats, ecosistemas o a la conservación de especies autóctonas.
  - c) Actividades agrarias.
  - d) La ganadería extensiva.
  - e) La caza y la pesca.
  - f) La apicultura.
  - g) La recolección de caracoles, cabrillas y otras especies recolectadas tradicionalmente.
  - h) Actividades de uso público, turismo activo y educación ambiental.
  - i) Instalación de equipamientos e infraestructuras de uso público y educación ambiental, así como las ligadas a la conservación y gestión del espacio natural protegido.

- j) Cualquier actuación que en el correspondiente procedimiento de autorización así se determine en los términos establecidos en la normativa que resulte de aplicación.
2. De acuerdo con los objetivos y propuesta de ordenación, y en los términos establecidos en la normativa general, se considera incompatible cualquier actuación que en el correspondiente procedimiento de autorización así se determine en los términos establecidos en la normativa que resulte de aplicación.

#### 5.4.3.2. *Áreas con Edificaciones. Zonas C.2*

1. De acuerdo con los objetivos y criterios de ordenación, y en los términos establecidos en la normativa general, se consideran compatibles los siguientes usos y actividades:
  - a) Actividades de investigación.
  - b) Las actuaciones encaminadas a la regeneración de hábitats y ecosistemas o de conservación de especies autóctonas.
  - c) Rehabilitación y mejora de edificaciones existentes.
  - d) Ejecución de equipamientos e infraestructuras de abastecimiento, saneamiento, viarias, energéticas y de comunicaciones, para el servicio de las edificaciones.
  - e) Actividades de uso público, turismo activo y educación ambiental.
  - f) Instalación de equipamientos e infraestructuras de uso público y educación ambiental, así como las ligadas a la conservación y gestión del espacio natural protegido.
  - g) Cualquier otra actuación que el correspondiente procedimiento de autorización determine como compatible en los términos establecidos en la normativa que resulte de aplicación.
2. De acuerdo con los objetivos y propuesta de ordenación, y en los términos establecidos en la normativa general, se considera incompatible cualquier actuación que en el correspondiente procedimiento de autorización así se determine en los términos establecidos en la normativa que resulte de aplicación.

#### 5.4.3.3. *Explotación acuícola de "San Carlos". Zonas C.3*

1. De acuerdo con los objetivos y propuesta de ordenación, y en los términos establecidos en la normativa general, se consideran compatibles los siguientes usos y actividades:
  - a) Actividades de investigación.
  - b) Actividades encaminadas a la regeneración de hábitats y ecosistemas o de conservación de especies autóctonas.
  - c) Actividades de uso público, turismo activo y de educación ambiental.
  - d) La instalación de equipamientos e infraestructuras de uso público y la educación ambiental, así como las ligadas a la conservación y gestión del espacio natural protegido.
  - e) La acuicultura intensiva.
  - f) El mantenimiento de edificaciones e infraestructuras propias de la explotación.



- g) Cualquier otra actuación que el correspondiente procedimiento de autorización determine como compatible en los términos establecidos en la normativa que resulte de aplicación.
- 2. De acuerdo con los objetivos y propuesta de ordenación, y en los términos establecidos en la normativa general, se considera incompatible cualquier actuación que en el correspondiente procedimiento de autorización así se determine en los términos establecidos en la normativa que resulte de aplicación.

## **6. CRITERIOS DE APLICACIÓN**

Los criterios en torno a los cuales se instrumenta la aplicación del presente Plan, así como del Plan Rector de Uso y Gestión, son los siguientes:

1. Cooperación y coordinación entre las distintas Administraciones Públicas con competencia en el ámbito de aplicación del presente plan, a fin de compatibilizar el ejercicio de las funciones de las distintas Administraciones para asegurar la protección efectiva de los valores ambientales y el uso racional de los recursos naturales existentes en el espacio.
2. Establecimiento de un marco de relaciones permanente y fluido con los habitantes del Parque Natural y su entorno, así como con las entidades sociales, económicas e institucionales, prestando especial atención a los propietarios o titulares de derechos en el espacio protegido.
3. Impulso del papel de la Junta Rectora como cauce más adecuado para garantizar la participación ciudadana en la conservación y gestión del Parque Natural.
4. La actuación de la Consejería de Medio Ambiente y demás Administraciones competentes se regirá por el principio de eficacia administrativa y transparencia, facilitando la simplificación de los trámites necesarios para la autorización de las actividades que se vayan a realizar en el espacio protegido, y el acceso a la información sobre medio ambiente que esté en poder de la Administración.
5. Las decisiones se tomarán de acuerdo con la mejor información disponible en cada momento, y en todo caso estarán orientadas por el principio de cautela.
6. Para la aplicación del presente Plan se desarrollarán los planes, programas o estrategias previstas en el mismo o en la normativa vigente.
7. De acuerdo con los objetivos de la Red de Espacios Naturales Protegidos de Andalucía, se garantizará el sometimiento a criterios comunes de gestión para la aplicación de las disposiciones de los Planes que regulen materias similares en dos o más Parques Naturales.
8. Integración de medidas de respeto al medio ambiente y al uso sostenible de los recursos naturales renovables como vía para la generación de empleo y arraigo de la población al ámbito rural.
9. Divulgación de los resultados de la gestión del espacio y de la evaluación y seguimiento de los Planes.

## **7. INDICADORES**

Con el fin de evaluar el grado de cumplimiento de los objetivos del presente Plan de Ordenación de Recursos Naturales, se establece el siguiente sistema de indicadores:

### 7.1. CONSERVACIÓN DE RECURSOS NATURALES

| OBJETIVO                                                         | INDICADOR                                 |
|------------------------------------------------------------------|-------------------------------------------|
| Control de los niveles del acuífero                              | Profundidad del nivel freático            |
| Restauración de la funcionalidad de la marisma                   | % Marisma natural                         |
| Niveles de Eutrofización                                         | Concentración de nitritos                 |
|                                                                  | Concentración de nitratos                 |
| Mejorar la conectividad para la fauna                            | Nº colisiones y electrocuciones / especie |
| Minimizar, vigilar y controlar el riesgo de incendios forestales | % Superficie quemada / año                |
| Disminución de la mortalidad de aves acuáticas / epizootias      | Nº de muertes                             |
| Incremento de la población de conejo                             | Densidad de conejos                       |
| Control de métodos de caza prohibidos                            | Nº denuncias                              |

### 7.2. APROVECHAMIENTO SOSTENIBLE DE LOS RECURSOS

| OBJETIVO                                                                                                                           | INDICADOR                                                                  |
|------------------------------------------------------------------------------------------------------------------------------------|----------------------------------------------------------------------------|
| Favorecer y potenciar la aplicación de medidas agroambientales                                                                     | % Superficie acogida a ayudas agroambientales y similares                  |
|                                                                                                                                    | % Superficie dedicada a agricultura ecológica / producción integrada       |
|                                                                                                                                    | Nº cabezas de ganado acogidas a ganadería ecológica / producción integrada |
| Minimizar impactos sobre los ecosistemas y especies producidos por la realización de actividades forestales                        | % Superficie ordenada respecto al total)                                   |
| Compatibilizar la carga ganadera con los objetivos de conservación del P. Natural, sobre todo en las zonas de alto valor ecológico | Cabezas de ganado / superficie                                             |
| Implantar sistemas renovables de producción de energía                                                                             | Nº de autorizaciones de instalación de sistemas de energías renovables     |

### 7.3. USO PÚBLICO

| OBJETIVO | INDICADOR |
|----------|-----------|
|----------|-----------|

|                                                                                                                                                                           |                                                                                                      |
|---------------------------------------------------------------------------------------------------------------------------------------------------------------------------|------------------------------------------------------------------------------------------------------|
| Orientar e informar a la población local y a los visitantes de la Comarca sobre las actividades, equipamientos y servicios de uso público ofrecidos por el Parque Natural | Nº de personas atendidas en los equipamientos del Parque Natural )                                   |
| Concienciar acerca de importancia de conservación de recursos naturales a personas y colectivos de usuarios que desarrollan sus actividades en el Parque Natural          | Nº de actividades, campañas y publicaciones desarrolladas)                                           |
| Regular la circulación de vehículos en el ámbito del Parque Natural                                                                                                       | Nº de vehículos transitando por los caminos públicos del Parque Natural urante la Romería del Rocío) |
| Avanzar y profundizar en las actividades de educación ambiental de la comarca de Doñana                                                                                   | (Nº de participantes en actividades de Educación Ambiental)                                          |
| Regular las actividades de las empresas turísticas que operan en la comarca de Doñana                                                                                     | (Nº de empresas autorizadas)                                                                         |

#### 7.4. INVESTIGACIÓN

| OBJETIVO                           | INDICADOR                                  |
|------------------------------------|--------------------------------------------|
| Regular la actividad investigadora | (Nº de proyectos autorizados y concluidos) |

#### 7.5. PARTICIPACIÓN SOCIAL E INSTITUCIONES

| OBJETIVOS                                                                                                                                      | INDICADOR                                                                                                    |
|------------------------------------------------------------------------------------------------------------------------------------------------|--------------------------------------------------------------------------------------------------------------|
| Establecer los mecanismos de participación en el desarrollo y seguimiento de los planes y programas que se desarrollan en la comarca de Doñana | (Número de foros / comisiones de seguimiento, y reuniones con colectivos en los que el Parque está presente) |

## **8. CARTOGRAFÍA DE ORDENACIÓN**

(Ver anexo cartográfico en [www.juntadeandalucia.es/medioambiente](http://www.juntadeandalucia.es/medioambiente))
