# Supplementary material
Source: MDPI journal article supplement (https://www.mdpi.com/2220-9964/10/9/630)

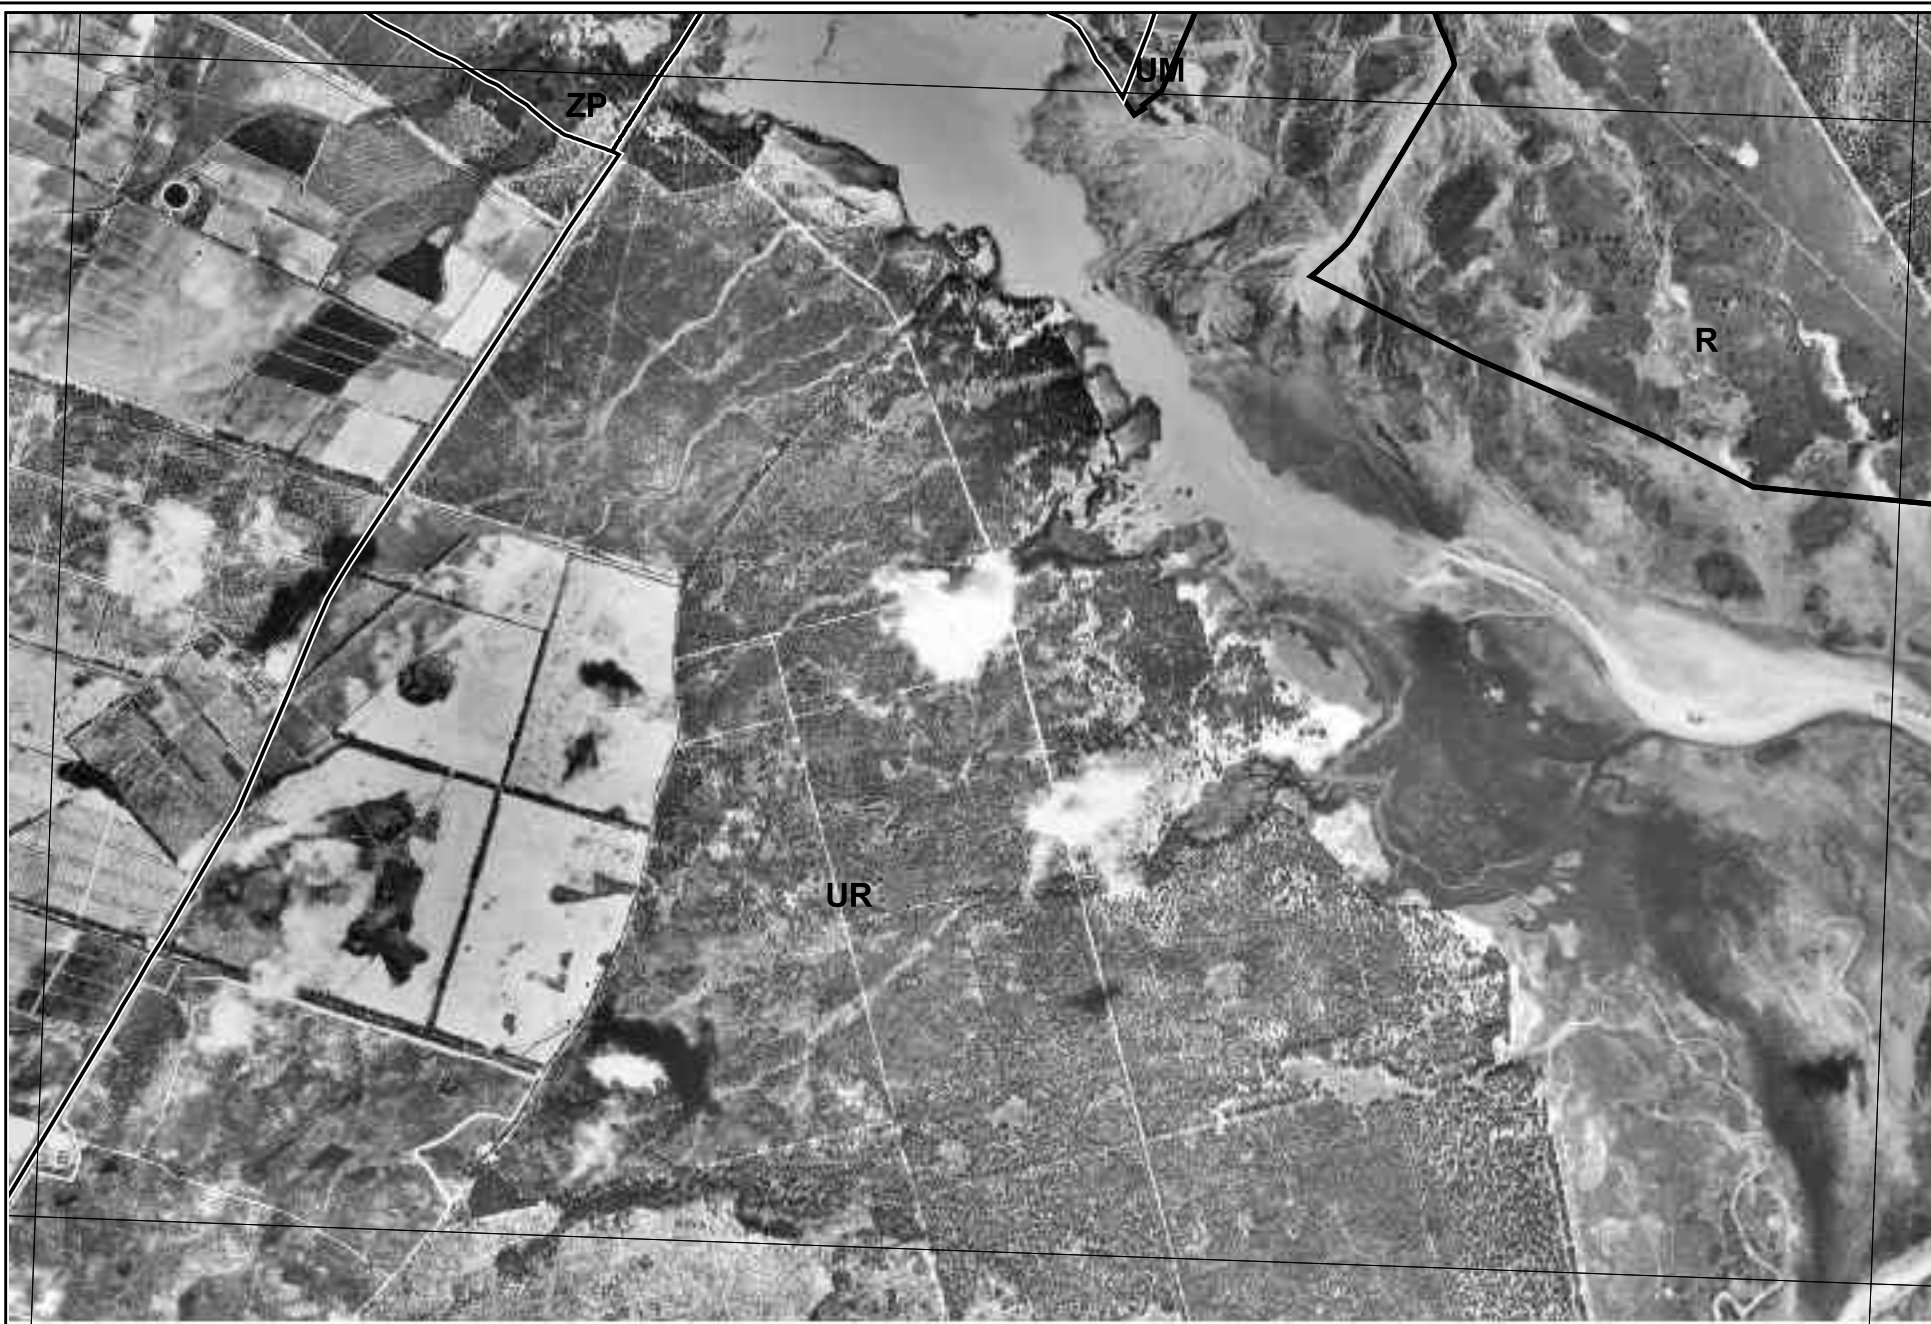

PLAN RECTOR DE USO Y GESTIÓN DEL PARQUE NACIONAL DE DOÑANA

**ZONIFICACIÓN**

HOJA 1018-12

500 0 500 metros

BASE CARTOGRÁFICA: Ortofotografía SIG Oleícola Español  
Ministerio de Agricultura, Pesca y Alimentación, 1998

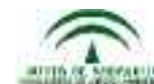

Supplement: s1 [file s1]
