# Supplementary material
Source: MDPI journal article supplement (https://www.mdpi.com/2220-9964/10/9/630)
Supplement: s1 [file s1]

## PLAN DE ORDENACIÓN DE LOS RECURSOS NATURALES DEL PARQUE NATURAL DE DOÑANA

## Límite y Zonificación 1001(3-2)

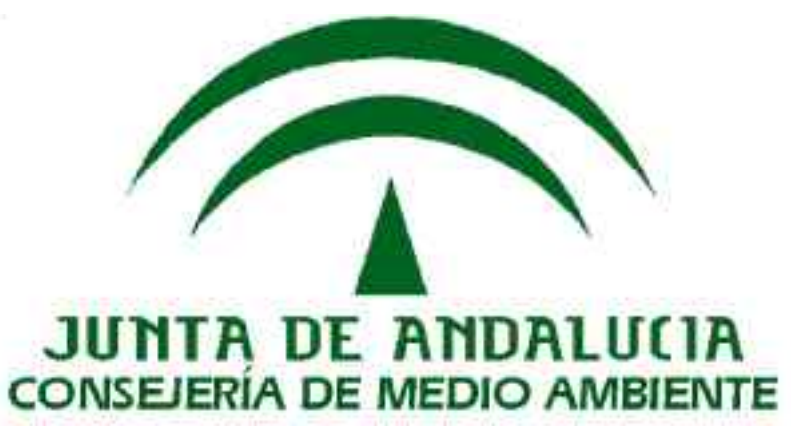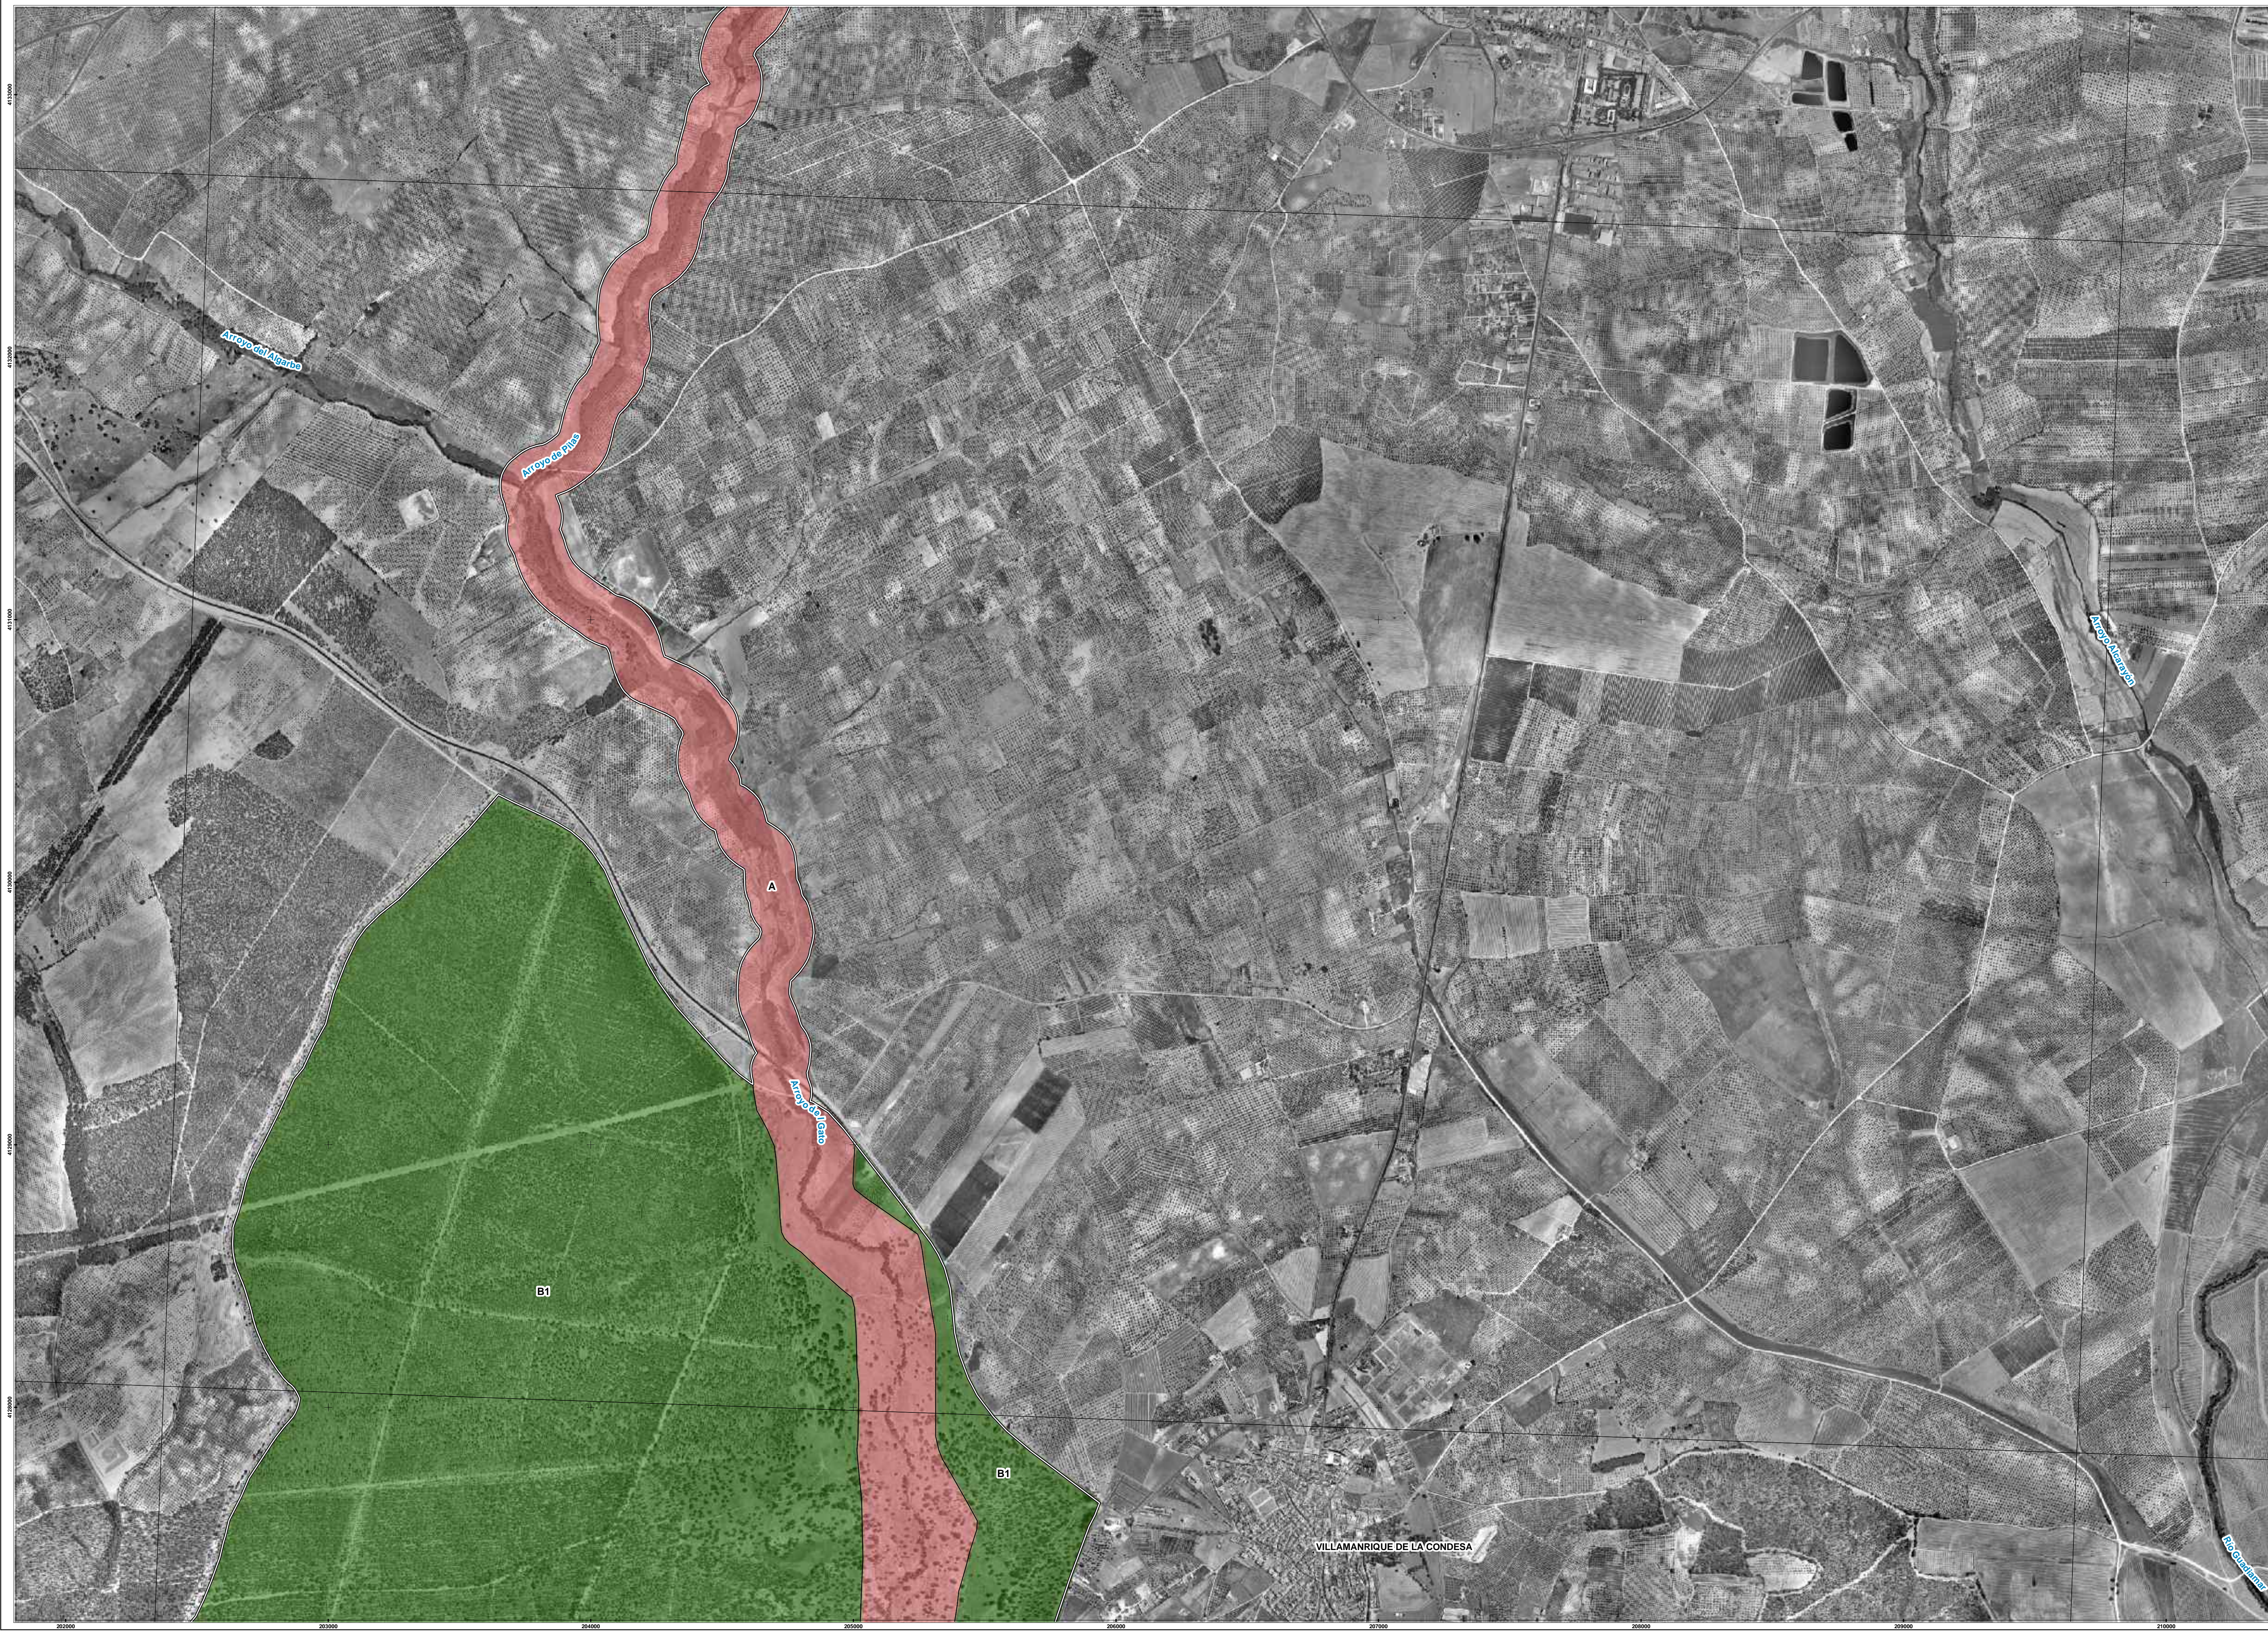

### Leyenda

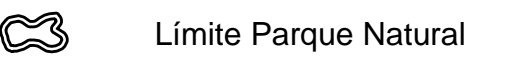

## ZONIFICACIÓN

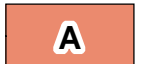

zonas de reserva

### Zonas de regulación especial

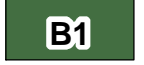

errenos de monte

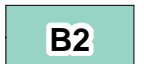

Parisma no explotada

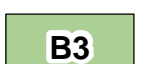

Parisma explotada

Zonas de regulación común

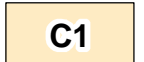

cultivos agrícolas

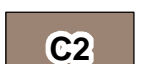

reas con edificaciones

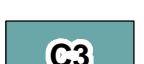

explotación acuícola intensiva

### Mapa de localización

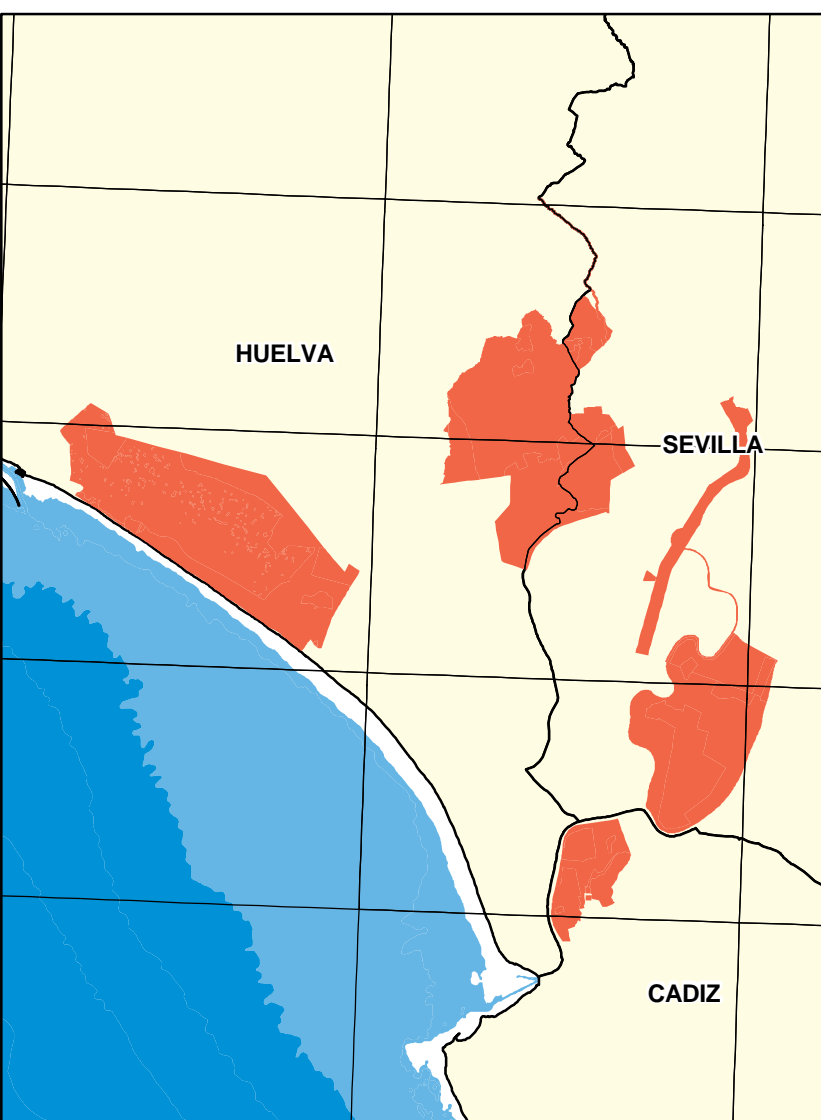**Distribución de hojas M.T.A. 1:10.000**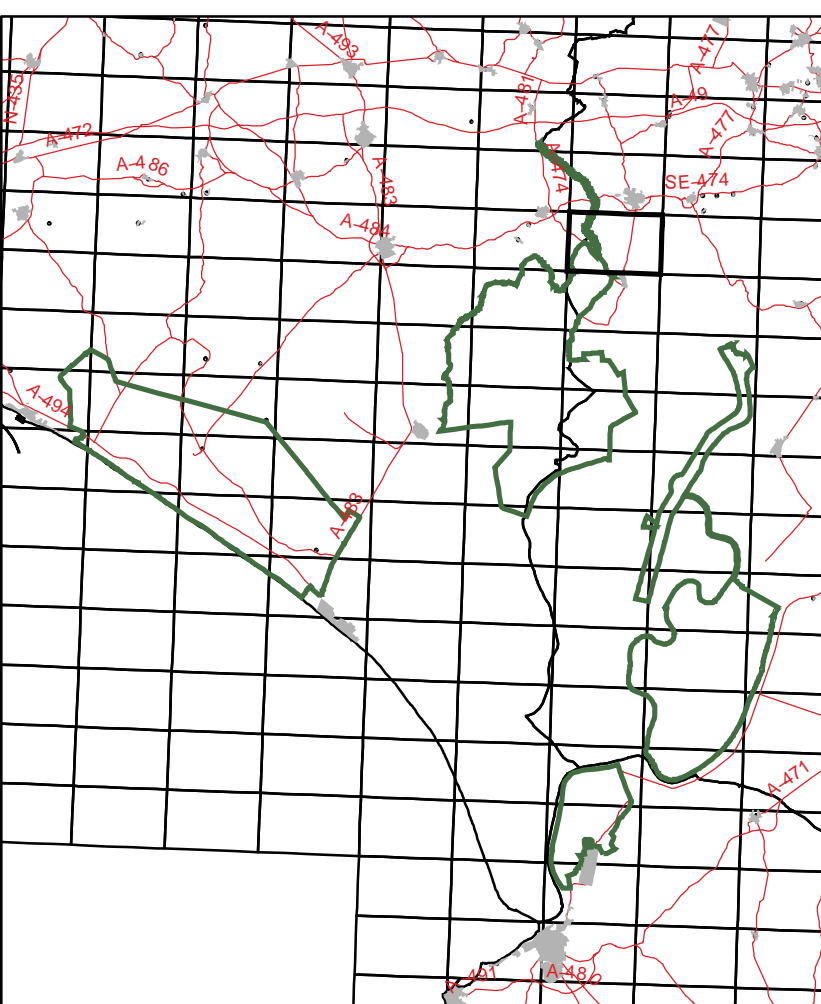

## PLAN DE ORDENACIÓN DE LOS RECURSOS NATURALES DEL PARQUE NATURAL DE DOÑANA

### Límite y Zonificación

|  |           |           |
|--|-----------|-----------|
|  | Hoja nº:  | Plano nº: |
|  | 1001(3-2) | 4         |

Fuente:  
Ortoimagen B/N  
(Junta de Andalucía, 2.001 –2.002)

**Escala:**



E: 1/10000 U.T.M. (huso 30)
