# Supplementary material
Source: MDPI journal article supplement (https://www.mdpi.com/2220-9964/10/9/630)
Supplement: s1 [file s1]

---

**MODELO DE DATOS DE LA CAPA  
DE ZONIFICACIÓN DE LA  
RESERVA DE LA BIOSFERA DE  
DOÑANA.**

**CONSEJERÍA DE MEDIO AMBIENTE Y  
ORDENACIÓN DEL TERRITORIO,  
JUNTA DE ANDALUCÍA.**

---

## ÍNDICE

---

---

|                                                  |   |
|--------------------------------------------------|---|
| Descripción del proyecto.....                    | 3 |
| Información geográfica vectorial .....           | 4 |
| Zonificación Reserva de la Biosfera Doñana ..... | 4 |
| Otros contenidos.....                            | 5 |

---

---

## DESCRIPCIÓN DEL PROYECTO

---

---

|                    |                                                                                                                                                                                                                                                                                                                                                                                                                                                                                                                                    |                    |                         |
|--------------------|------------------------------------------------------------------------------------------------------------------------------------------------------------------------------------------------------------------------------------------------------------------------------------------------------------------------------------------------------------------------------------------------------------------------------------------------------------------------------------------------------------------------------------|--------------------|-------------------------|
| <b>NOMBRE</b>      | Capa de zonificación de la Reserva de la Biosfera de Doñana.                                                                                                                                                                                                                                                                                                                                                                                                                                                                       | <b>ABREVIACIÓN</b> | Zonificacion_RdB_Donana |
| <b>DESCRIPCIÓN</b> | La capa se divide en tres zonas según su nivel de protección: Zona núcleo (ecosistemas mínimamente perturbados y característicos), zona Tampón (espacios dónde sólo pueden realizarse actividades que contribuyan a los múltiples objetivos de la Reserva) y zona de transición (dinámica y siempre expansiva zona de cooperación, donde el trabajo de la Reserva de la Biosfera es aplicado discretamente a las necesidades de las comunidades locales de la región. Puede contener asentamientos, campos, pastizales y bosques). |                    |                         |

## INFORMACIÓN GEOGRÁFICA VECTORIAL

### ZONIFICACIÓN RESERVA DE LA BIOSFERA DOÑANA

|                                    |                                                                |                                    |
|------------------------------------|----------------------------------------------------------------|------------------------------------|
| <b>UBICACIÓN</b>                   | InfGeografica\InfVectorial\Shapes                              |                                    |
| <b>NOMBRE FÍSICO</b>               | <b>Zonificacion_RdB_Donana</b>                                 |                                    |
| <b>MODELO DE DATOS GEOGRÁFICOS</b> | <b>X Polígono</b><br>- Punto<br>- Puntos múltiples<br>- Líneas | - Con cota (Z)<br>- Con medida (M) |
|                                    | - Anotación                                                    |                                    |
| <b>DESCRIPCIÓN</b>                 | Capa de zonificación de la Reserva de la Biosfera de Doñana.   |                                    |

### CAMPOS ZONIFICACION\_RDB\_DONANA

| <b>NOMBRE</b> | <b>DESCRIPCIÓN CORTA</b> | <b>DESCRIPCIÓN</b>                                                                                                                                                                                               | <b>TIPO DE DATO</b> |
|---------------|--------------------------|------------------------------------------------------------------------------------------------------------------------------------------------------------------------------------------------------------------|---------------------|
| CODIGOESPA    | CÓDIGO ESPACIO           | Código del espacio natural protegido a nivel autonómico                                                                                                                                                          | Numérico            |
| NOMBRE        | NOMBRE                   | Denominación de la Reserva de la Biosfera                                                                                                                                                                        | Texto (140)         |
| COD_ZONIF     | CÓDIGO ZONIFICACIÓN      | Código de la zonificación de la Reserva de la Biosfera, puede ser:<br>– TMP-M (Zona marina tampón)<br>– TR-T (Zona terrestre de transición)<br>– NU-T (Zona terrestre núcleo)<br>– TMP-T (Zona terrestre tampón) | Texto (5)           |
| DESZONA       | DESCRIPCIÓN ZONIFICACIÓN | Descripción de la zonificación, puede ser:<br>– Zona marina tampón<br>– Zona terrestre de transición<br>– Zona terrestre núcleo<br>– Zona terrestre tampón                                                       | Texto (200)         |
| FIG_PROT      | FIGURA DE PROTECCIÓN     | Indica la figura de Protección coincidente espacialmente con la Reserva de la Biosfera                                                                                                                           | Texto (20)          |
| SUPERFICIE    | SUPERFICIE (Ha.)         | Superficie en hectáreas de cada zona.                                                                                                                                                                            | Numérico            |

## OTROS CONTENIDOS

| UBICACIÓN     | Documentos\Cartografia                                                                                                                                                                                                                                                                                                                                                                    |
|---------------|-------------------------------------------------------------------------------------------------------------------------------------------------------------------------------------------------------------------------------------------------------------------------------------------------------------------------------------------------------------------------------------------|
| NOMBRE FÍSICO | 01_Zonificacion_RdB_Donana.jpg<br>02_Zonificacion_RdB_Donana.jpg<br>03_Zonificacion_RdB_Donana.jpg<br>04_Zonificacion_RdB_Donana.jpg<br>05_Zonificacion_RdB_Donana.jpg<br>06_Zonificacion_RdB_Donana.jpg<br>07_Zonificacion_RdB_Donana.jpg<br>08_Zonificacion_RdB_Donana.jpg<br>09_Zonificacion_RdB_Donana.jpg<br>10_Zonificacion_RdB_Donana.jpg<br>...<br>28_Zonificacion_RdB_Donana.jpg |
| DESCRIPCIÓN   | 28 mapas de la zonificación de la Reserva de la Biosfera de Doñana, a escala de detalle en sistema de referencia ETRS89 UTM Huso 30N.                                                                                                                                                                                                                                                     |
