# Supplementary material
Source: MDPI journal article supplement (https://www.mdpi.com/2220-9964/10/9/630)

PLAN DE ORDENACIÓN DE LOS RECURSOS NATURALES DEL PARQUE NATURAL DE DOÑANA

Límite y Zonificación 1018(3-3)

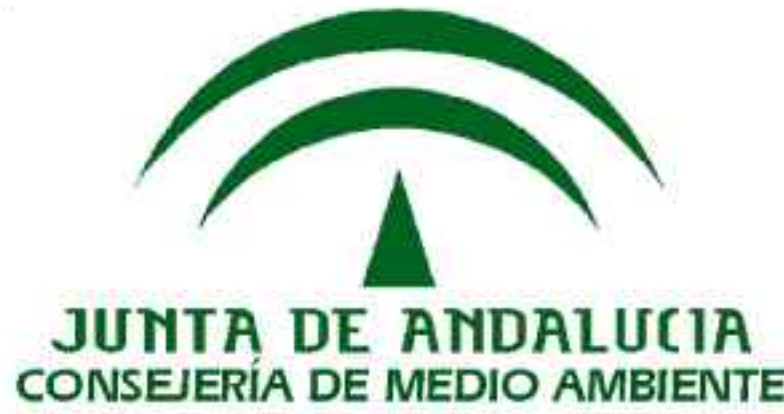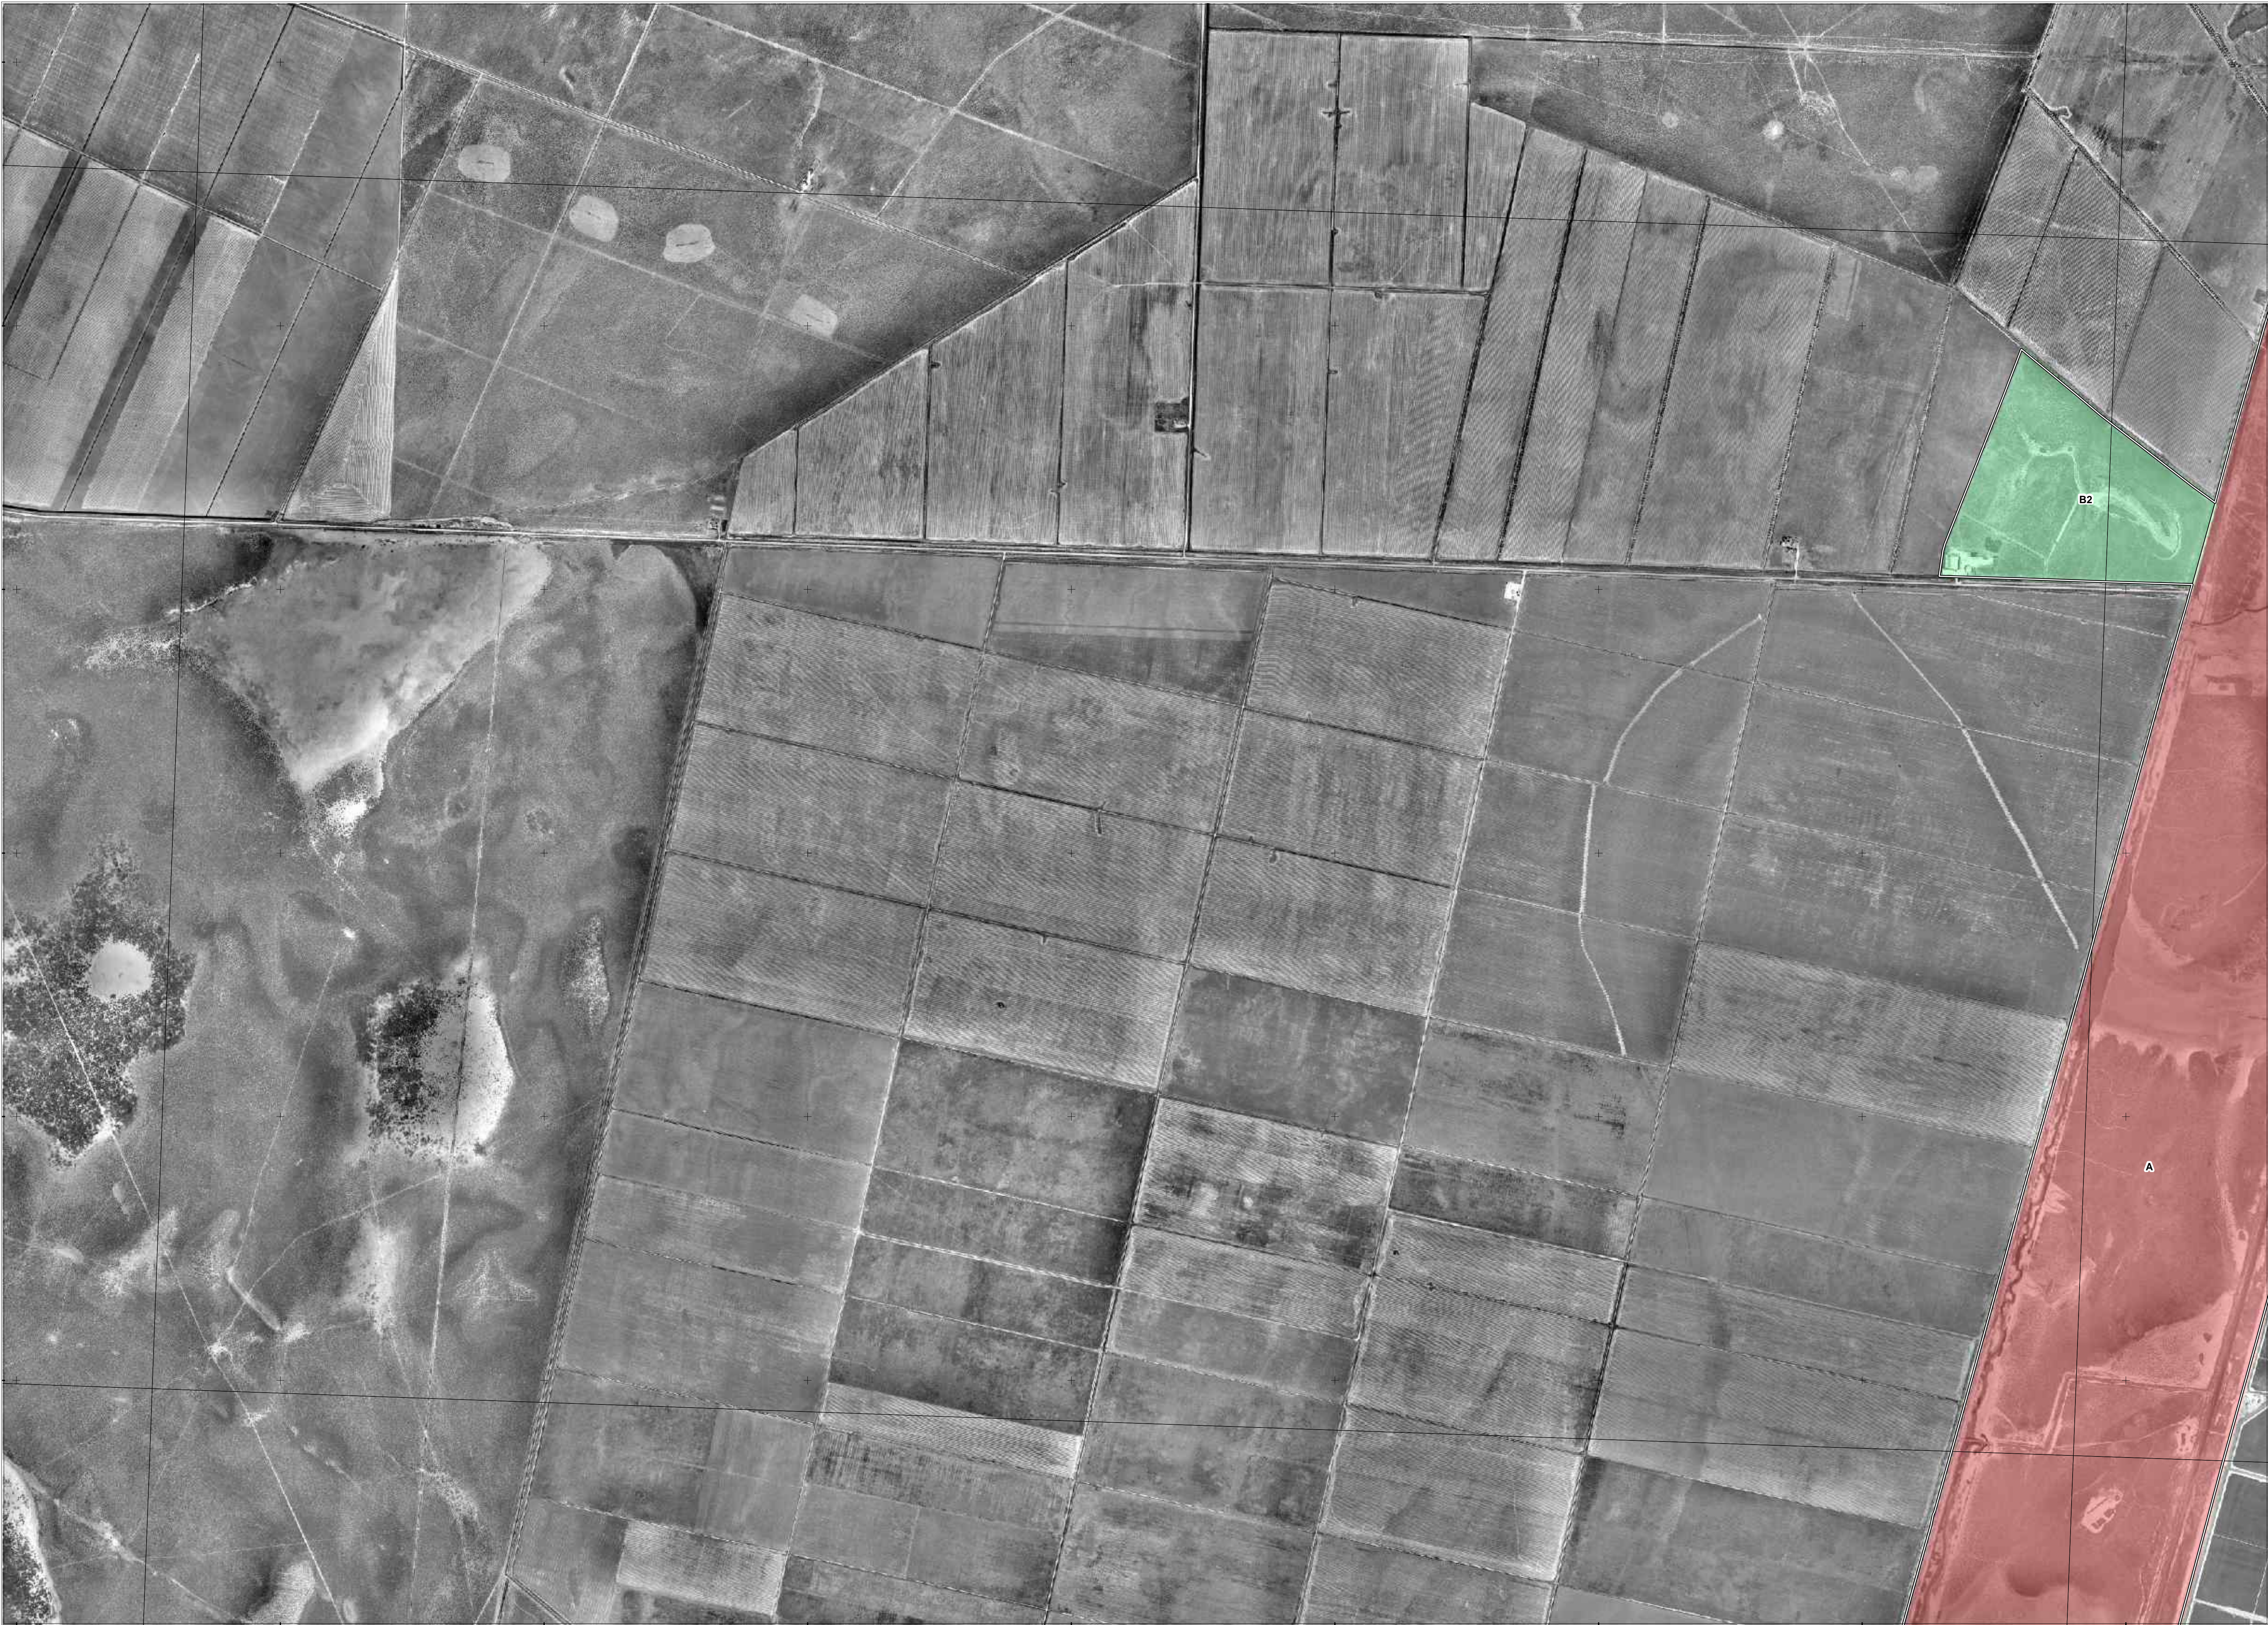

Leyenda

Límite Parque Natural

ZONIFICACIÓN

Zonas de reserva

Zonas de regulación especial

B1 Terrenos de monte

B2 Marisma no explotada

B3 Marisma explotada

Zonas de regulación común

C1 Cultivos agrícolas

C2 Áreas con edificaciones

C3 Explotación acuícola intensiva

Mapa de localización

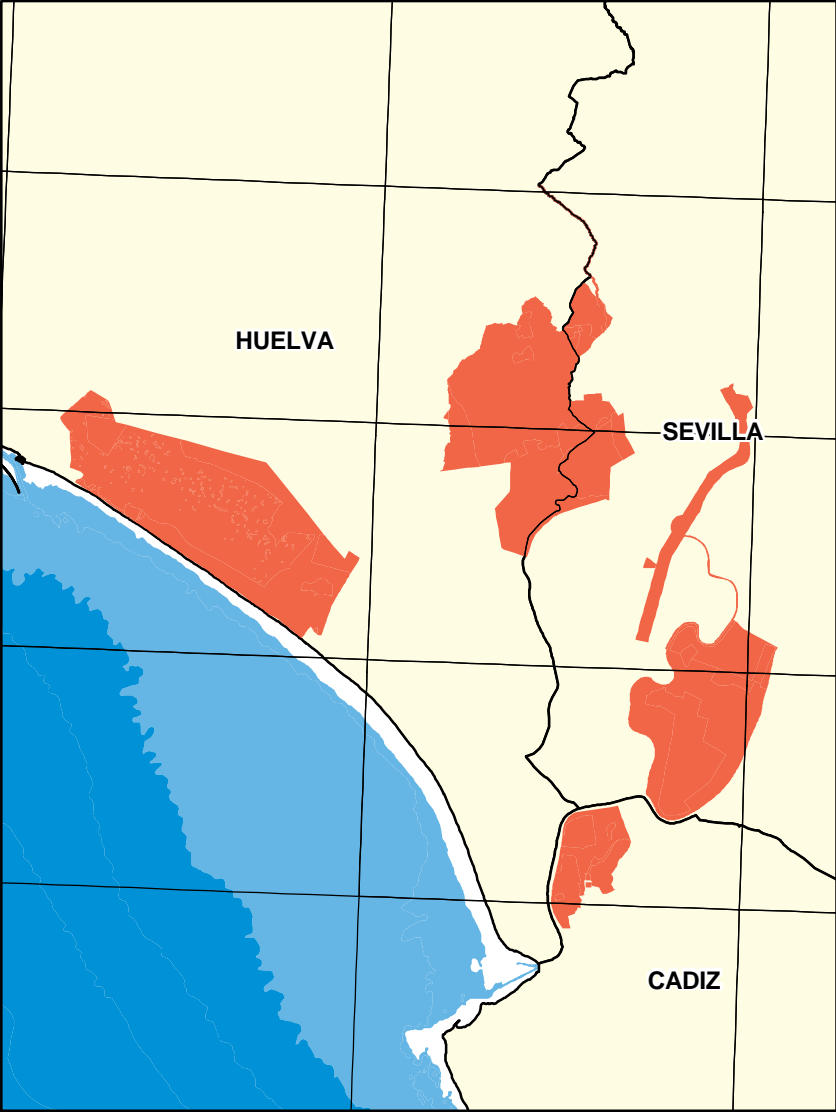

Distribución de hojas M.T.A. 1:10.000

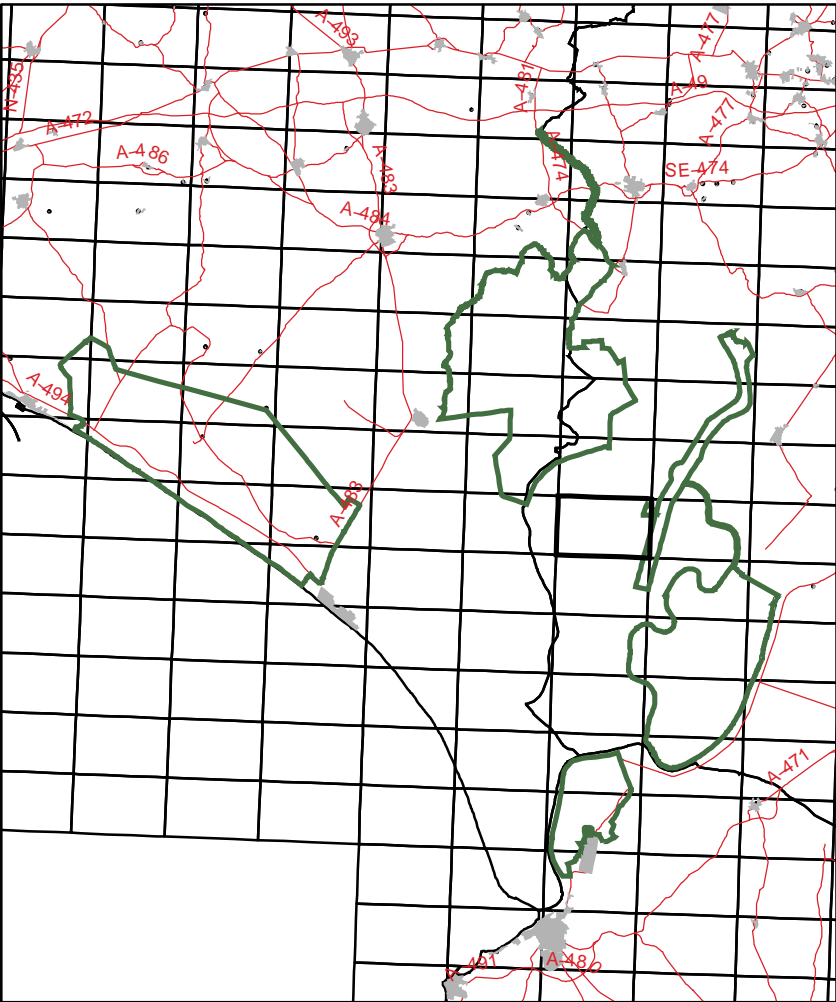

PLAN DE ORDENACIÓN DE LOS RECURSOS NATURALES DEL PARQUE NATURAL DE DOÑANA

Límite y Zonificación

| Hoja nº:  | Plano nº: |
|-----------|-----------|
| 1018(3-3) | 32        |

Fuente: Ortoimagen B/N  
(Junta de Andalucía, 2.001 –2.002)

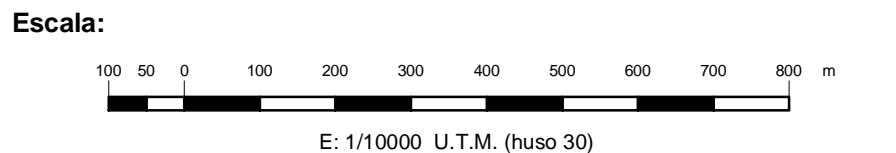

Supplement: s1 [file s1]
