# Supplementary material
Source: MDPI journal article supplement (https://www.mdpi.com/2220-9964/10/9/630)
Supplement: s1 [file s1]

PLAN DE ORDENACIÓN DE LOS RECURSOS NATURALES DEL PARQUE NATURAL DE DOÑANA

Límite y Zonificación 1001(1-3)

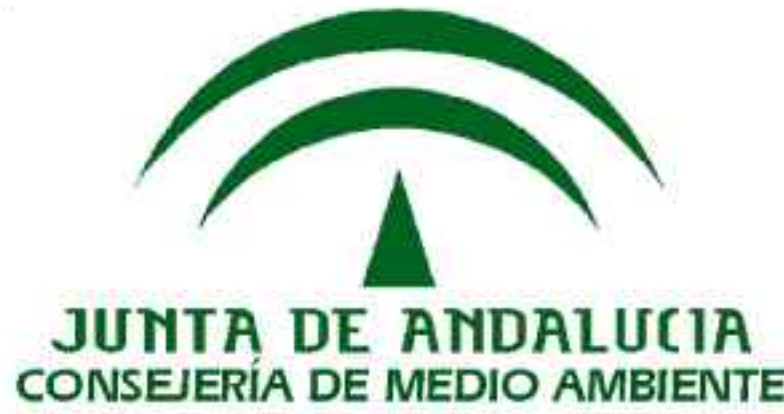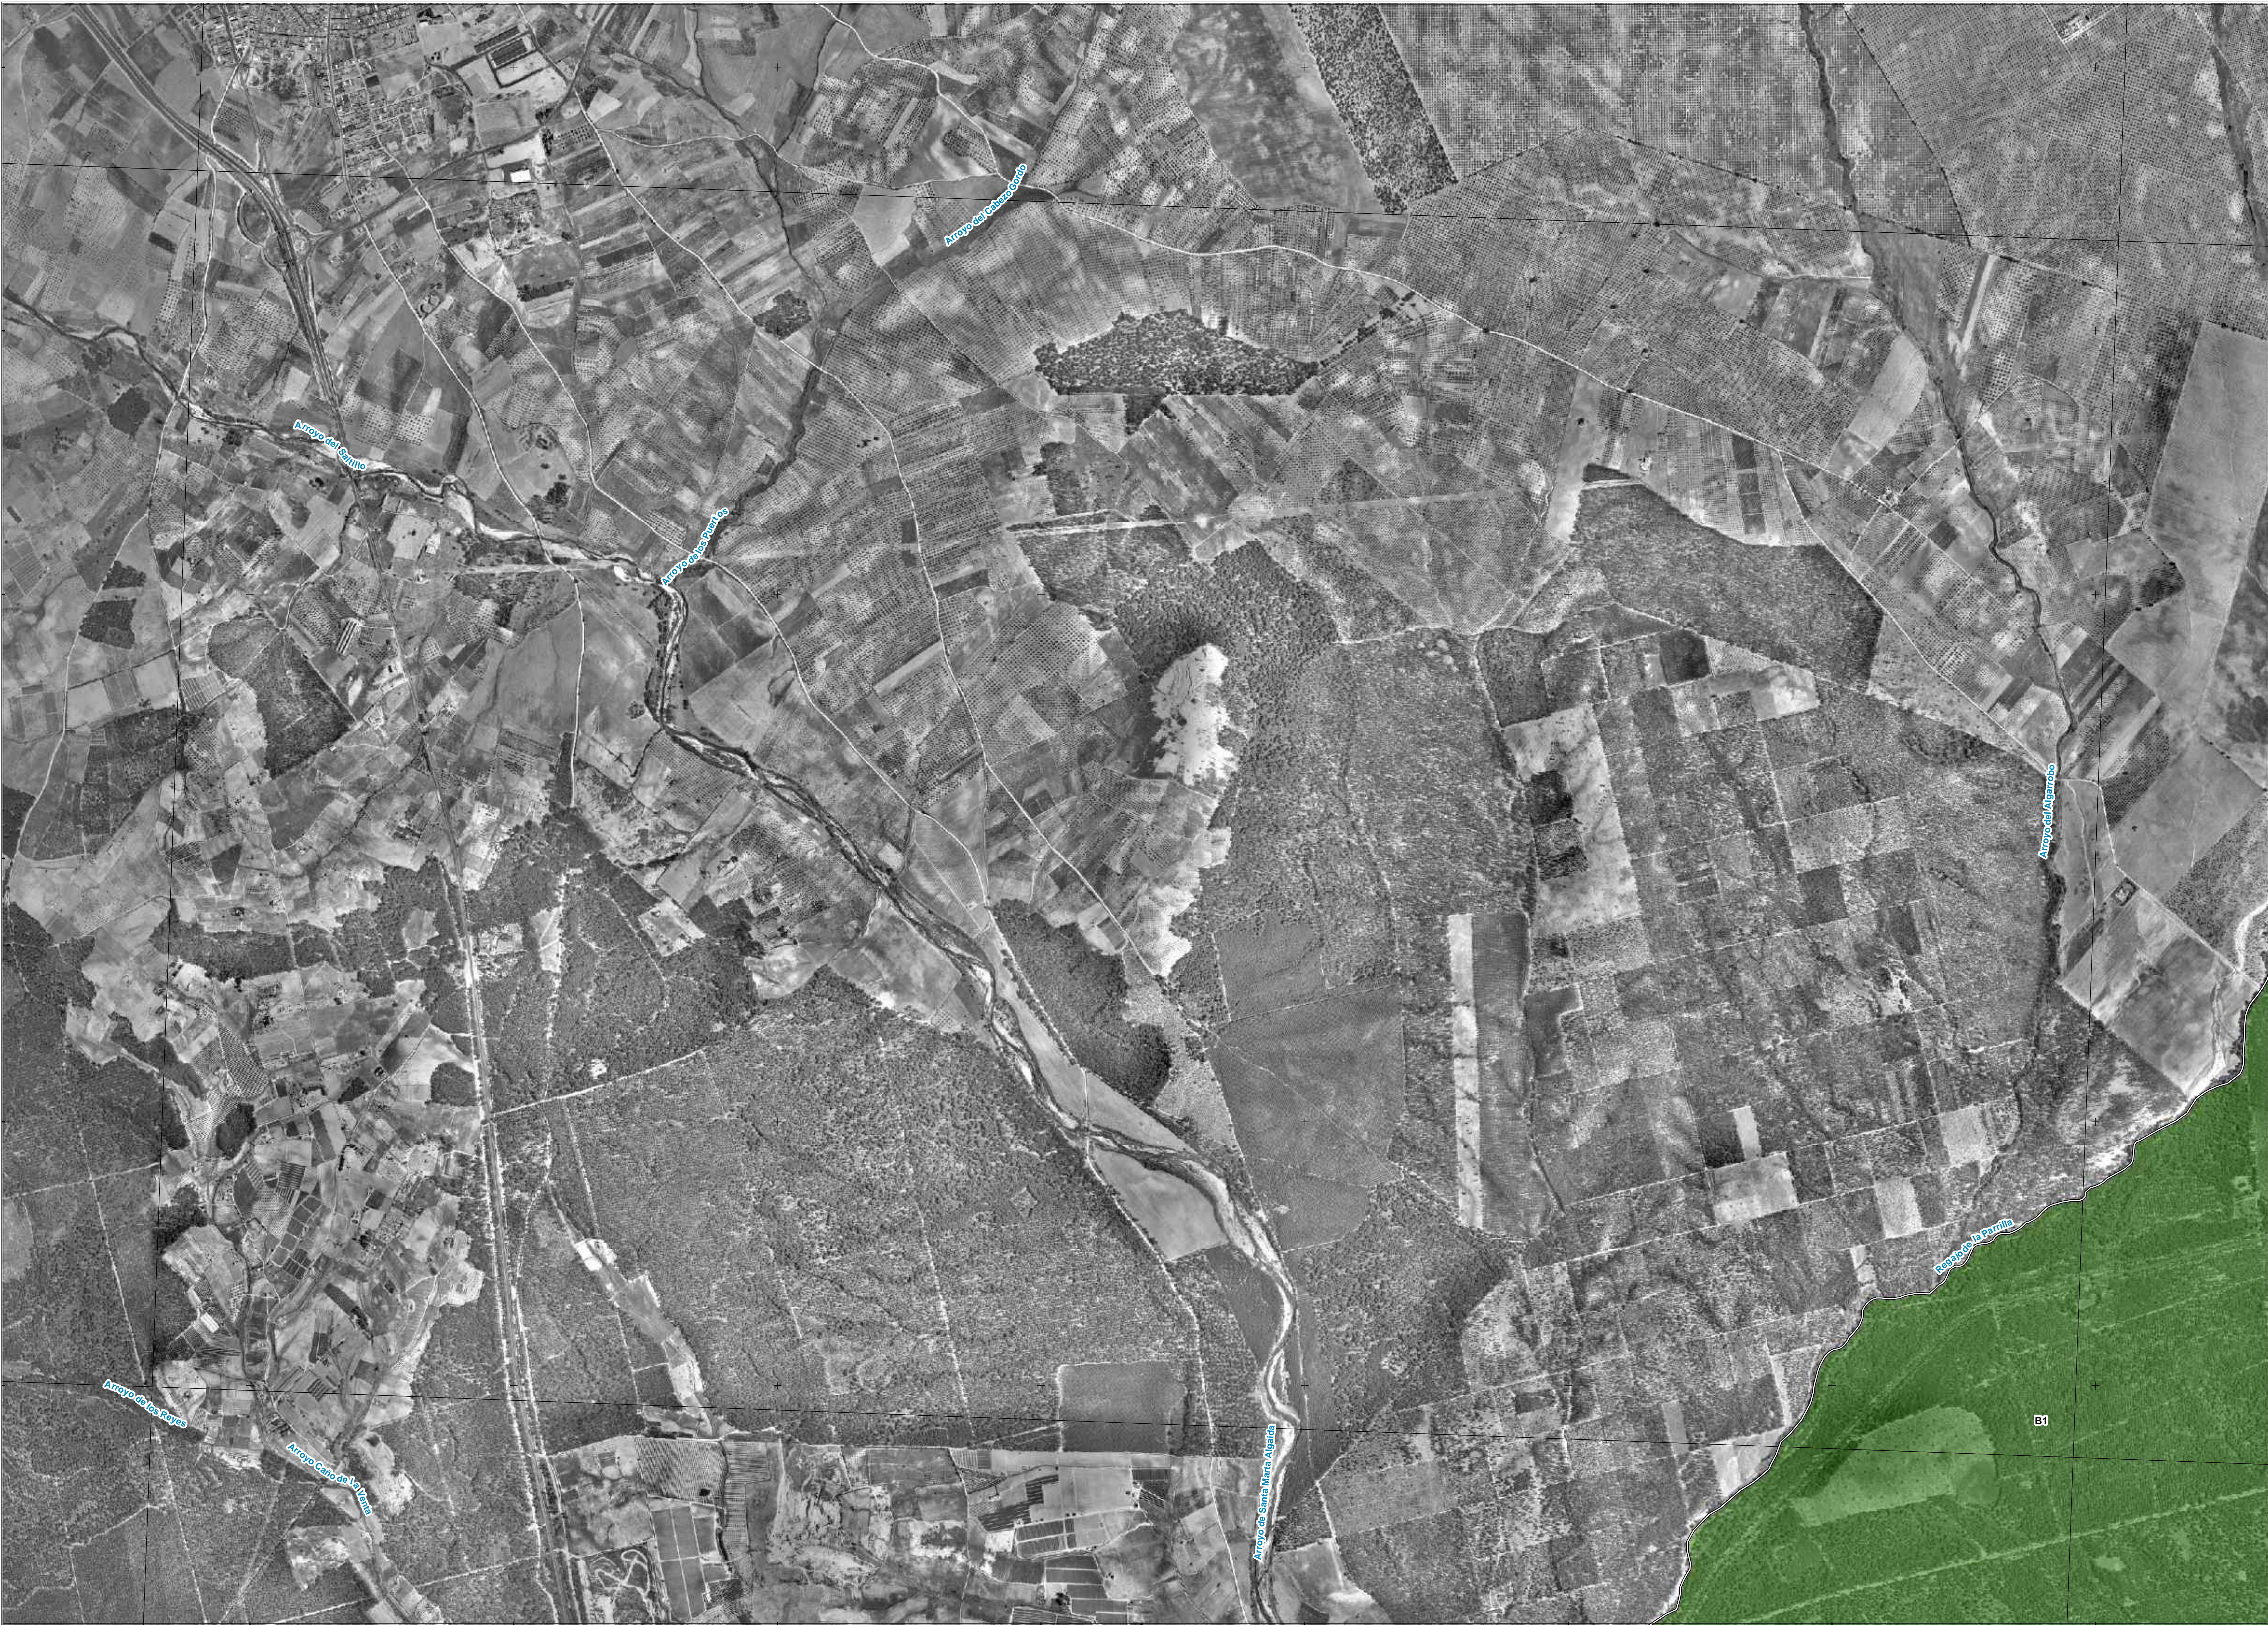

Leyenda

- Limites Parque Natural
- ZONIFICACIÓN
- A Zonas de reserva
- Zonas de regulación especial
- B1 Terrenos de monte
- B2 Marisma no explotada
- B3 Marisma explotada
- Zonas de regulación común
- C1 Cultivos agrícolas
- C2 Áreas con edificaciones
- C3 Explotación acuícola intensiva

Mapa de localización

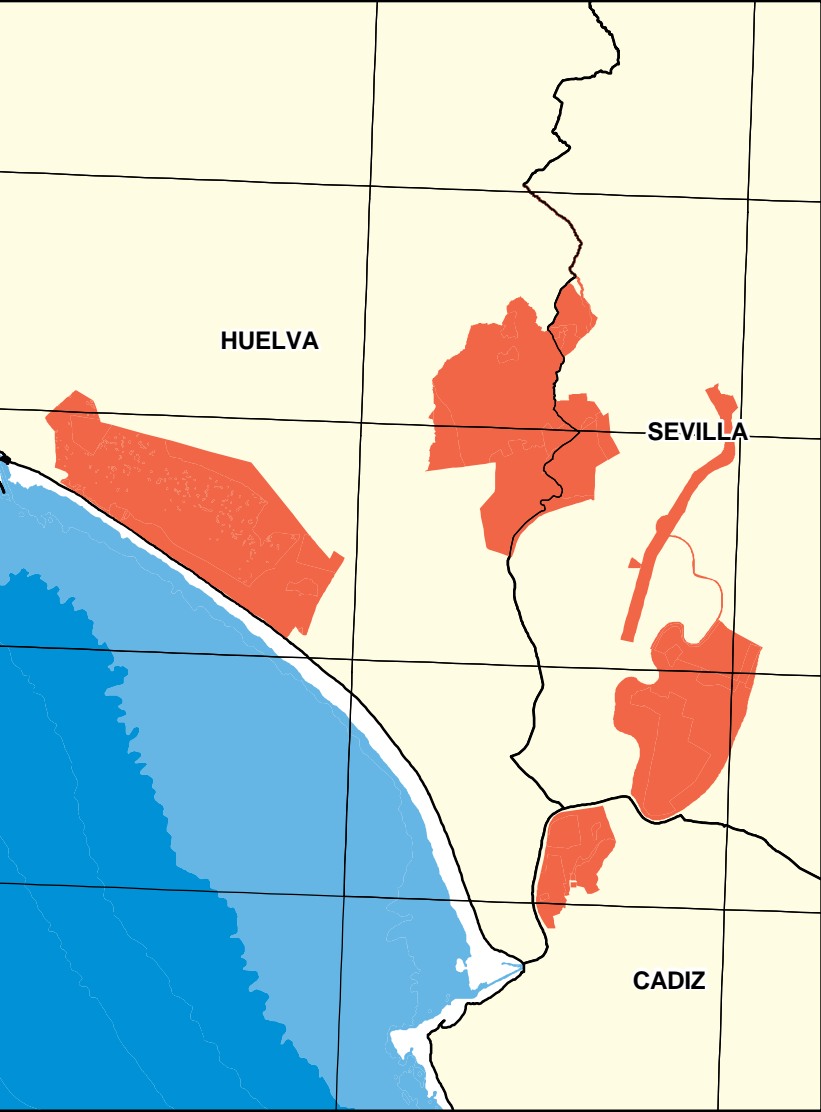

Distribución de hojas M.T.A. 1:10.000

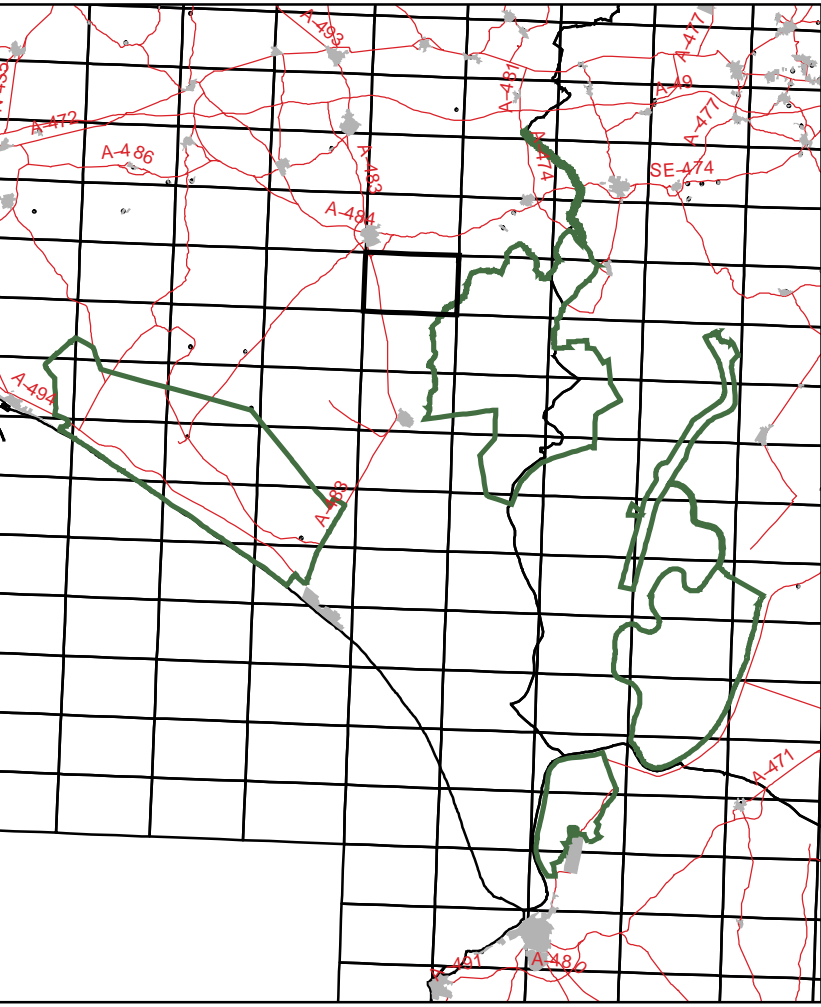

PLAN DE ORDENACIÓN DE LOS RECURSOS NATURALES DEL PARQUE NATURAL DE DOÑANA

| Límite y Zonificación                                |  |  |
|------------------------------------------------------|--|--|
| Fuente:                                              |  |  |
| Ortoimagen B/N<br>(Junta de Andalucía, 2.001 -2.002) |  |  |
| Escala:                                              |  |  |
| 100 50 0 100 200 300 400 500 600 700 800 m           |  |  |
| E: 1/1'0000 U.T.M. (huso 30)                         |  |  |
