# Supplementary material
Source: MDPI journal article supplement (https://www.mdpi.com/2220-9964/10/9/630)
Supplement: s1 [file s1]

### ANEXO III

#### LÍMITES DEL PARQUE NATURAL DE DOÑANA

Los Límites quedan referidos a la ortofotografía digital de la Junta de Andalucía, en blanco y negro, con tamaño de píxel de 0,5 metros, y de fecha 2001-2002. Los puntos citados en la delimitación del espacio vienen dados en coordenadas UTM, en metros, referidas al huso 30.

#### 1. LÍMITES DEL SECTOR NORTE: COTO DEL REY, GATO, HATO BLANCO NUEVO Y VIEJO, MARISMA GALLEGA DE HINOJOS

##### *Oeste:*

Se inicia en el punto de unión del Parque Nacional de Doñana y el límite intermunicipal de Almonte e Hinojos, en el punto de coordenadas UTM, huso 30, en metros, X 192401; Y 4115571, continuando por éste hasta su enlace con el Regajo de Vallehondo, en el punto de coordenadas UTM, huso 30, en metros, X 196037; Y 4126976.

##### *Norte:*

Desde el punto anterior sigue en dirección este, por la senda que conduce a las casas de la Calera y desde aquí con rumbo Norte a la carretera hacia Hinojos, la cual se abandona al enlazar con el Arroyo de la Mayor. Se sigue el anterior arroyo aguas abajo hasta el Pozo de Melo, para continuar posteriormente por la senda en dirección este hacia el límite interprovincial de Sevilla y Huelva, hasta alcanzarlo en el punto de coordenadas UTM, huso 30, en metros, X 202117; Y 4126619, continuando por el citado límite interprovincial hasta el punto de coordenadas UTM, huso 30, en metros, X 203648; Y 4130336, donde enlaza con la margen sur de la antigua carretera Hinojos-Villamanrique de la Condesa, por el que discurre hasta 100 m antes de su intersección con el Arroyo de Pilas.

Sube en dirección Norte paralelo al cauce del Arroyo de Pilas hasta llegar al límite del término municipal de Chucena, en este punto cruza el cruce del Arroyo de Pilas hasta 100 m de la margen izquierda. Desde aquí baja en dirección sur hasta su intersección con la margen sur de la carretera anterior, Hinojos-Villamanrique de la Condesa, en el punto de coordenadas UTM, huso 30, en metros, X 204836; Y 4129166.

##### *Este:*

Se continúa por la carretera ya citada hacia Villamanrique, para seguir posteriormente por la margen derecha del camino asfaltado que va al Rocío, hasta el límite provincial entre Sevilla y Huelva. Continúa este límite en dirección Sur hasta el punto de unión del límite interprovincial con el límite norte del monte público la Juncosilla. Continúa en dirección Este bordeando el monte público La Juncosilla, y posteriormente, en dirección sureste por los límites de los Cotos I y II de Hato Ratón hasta el camino de la Cigüeña, y por el mismo en dirección noreste hasta enlazar con el camino más oriental de la finca de Hato Ratón. Continúa por este camino en dirección sureste hasta su intersección con el encauzamiento del Guadiamar, en el punto de coordenadas UTM, huso 30, en metros, X 207691; Y 4117028. Continúa por la margen izquierda del Caño Guadiamar encauzado hasta el límite con el Parque Nacional de Doñana, en el punto de coordenadas UTM, huso 30, en metros, X 199212; Y 4108896.

##### *Sur:*

Desde el punto anterior continúa hacia el Oeste por el límite del Parque Nacional de Doñana hasta su encuentro con el punto de origen de este sector.

## 2. LÍMITES DEL SECTOR ESTE: ENTREMUROS, EL CANGREJO, HUERTA TEJEDA, BRAZO DE LA TORRE Y VETA DE LA PALMA

### *Oeste:*

Comienza en el vértice suroriental de la finca Los Caracoles, punto de coordenadas UTM, huso 30, en metros, X 207732; Y 4102444. Desde aquí asciende en dirección Norte, siguiendo el límite este de dicha finca hasta llegar a la finca de Huerta Tejeda, en el punto de coordenadas UTM, huso 30, en metros, X 209251; Y 4108019. Bordea la finca por sus límites sur, oeste y norte, incluyéndola dentro del espacio, hasta su intersección con el muro derecho de Entremuros, punto de coordenadas UTM, huso 30, en metros, X 209338; Y 4108329. Desde aquí, asciende en dirección norte por la margen este de dicho muro hasta su intersección con el camino que conduce a la casa del Cerrado, continuando por la margen izquierda del caño del Juncal en dirección Sureste hasta alcanzar, por el talud de Entremuros, el muro de la margen izquierda del nuevo encauzamiento del Brazo de la Torre.

### *Este:*

Sigue en dirección Sur por la margen oeste del muro izquierdo hasta la salida del Brazo de la Torre de su encauzamiento de Entremuros, en el punto de coordenadas UTM, huso 30, en metros, X 211578; Y 4110623. Continúa por la margen izquierda del cauce del Brazo de la Torre hasta encontrarse con el colector de la Veta de la Palma (Bomba del Italiano), en el punto de coordenadas UTM, huso 30, en metros, X 215350; Y 4104026. Desde este colector, por el camino que se dirige al cortijo de Veta de la Palma y desde aquí en línea recta, hasta la caseta de bombeo situada en el camino Sur de la finca Reina Victoria, punto de coordenadas UTM, huso 30, en metros, X 218819; Y 4101834, a partir de la cual sigue por la margen derecha del río Guadalquivir hasta la desembocadura en este río del Brazo de la Torre, en el punto de coordenadas UTM, huso 30, en metros, X 208496; Y 4090395.

### *Sur:*

Sigue en dirección Norte por la margen izquierda de este brazo -por el límite del Parque Nacional de Doñana-. Cruza este cauce a su margen derecha en el punto de coordenadas UTM, huso 30, en metros, X 210023; Y 4101754, donde lo hace el límite del Parque Nacional de Doñana, y asciende por esta margen derecha hasta su encuentro con el muro izquierdo de Entremuros. Continúa por la margen oeste de este muro en dirección Sur hasta encontrar el límite con el Parque Nacional de Doñana, en el punto de coordenadas UTM, huso 30, en metros, X 208697; Y 4102244. Sigue este límite en dirección Oeste hasta llegar al primer punto citado en este sector.

## 3. LÍMITES DEL SECTOR SUR: PINAR DE LA ALGAIDA, LAGUNA DEL TARELO, SALINAS DE SANLÚCAR Y MARISMA DE HENARES

### *Norte:*

Se inicia en la margen izquierda del río Guadalquivir desde la Punta de los Cepillos hasta la desembocadura del caño de Martín Ruiz, en el punto de coordenadas UTM, huso 30, en metros, X 206334; Y 4089492.

### *Este:*

Desde el punto anterior en dirección Sureste por el citado caño hasta la ermita de Nuestra Señora del Carmen y desde aquí en dirección Sur por el camino de separación del Pinar de la Algaída y las marismas transformadas hasta el límite de la finca denominada de los Prados, en el punto de coordenadas UTM, huso 30, en metros, X 206126; Y 4082893.

### *Sur:*

Continúa bordeando el Pinar de la Algaída por su límite Sur, dirección Oeste, hasta llegar a la laguna del Tarelo, en el punto de coordenadas UTM, huso 30, en metros, X 204284; Y 4083218. La

bordea por su orilla, incluyéndola, hasta encontrar el borde del Pinar de la Algaida, continuando por el mismo hasta su contacto con el camino vecinal que transcurre al Este de la Marisma de Henares y Salinas de Nuestra Señora del Rocío y Marismas de la Dehesilla, siguiendo este camino en dirección Sur hasta su cruce por la carretera que desde el Faro va a la colonia de la Algaida, y desde aquí en línea recta en dirección Oeste hasta la margen izquierda del río Guadalquivir, punto de coordenadas UTM, huso 30, en metros, X 202590; Y 4079883.

*Oeste:*

Se continúa por dicha margen hasta el punto inicial.

#### 4. LÍMITES DEL SECTOR OESTE: ABALARIO

*Norte:*

Se inicia en el caserío de Pinos de Galés y va, en dirección noreste por el Camino de la Portuguesa, hasta encontrarse con el Carril del Sevillano; desde aquí, y en dirección Sur, por dicho carril hasta la casa forestal del Coto de Tres Rayas, en el punto de coordenadas UTM, huso 30, en metros, X 167108; Y 4119457, desde donde parte en dirección Este y en línea recta hasta el poblado de La Mediana en su extremo Sur; en el punto de coordenadas UTM, huso 30, en metros, X 178873; Y 4116272, desde este punto en línea recta hasta el cortijo San Vicente, punto de coordenadas UTM, huso 30, en metros, X 184157; Y 4109704, y desde aquí hasta la casa finca El Alamillo, punto de coordenadas UTM, huso 30, en metros, X 184981; Y 4108785. Desde este punto, en dirección noreste, en línea recta, hasta el punto de coordenadas UTM, huso 30, en metros, X 185313; Y 4109364, y desde aquí, y también en línea recta, hasta el punto de coordenadas UTM, huso 30, en metros, X 186174; Y 4108830, en la linde de la carretera comarcal Almonte-Torre La Higuera, A-483.

*Este:*

Desde el punto anterior desciende en dirección Sur por la margen oeste de la A-483, por el límite este de las fincas La Veguilla, El Alamo y El Acebuche. Continúa por el límite sur de la citada finca El Acebuche hasta llegar a la altura de la pista de acceso al camping Rocío Playa, en el punto de coordenadas UTM, huso 30, en metros, X 182311; Y 4103467, siguiendo por la margen oeste de la misma y continuando en línea recta hasta la base del Acanilado del Asperillo.

*Sur:*

Desde este punto en dirección Oeste por la base del acantilado del Asperillo, (coincidiendo, en parte, con el límite del Monumento Natural Acanilado del Asperillo), hasta el punto de coordenadas UTM, huso 30, en metros, X 163902; Y 4114747, desde donde asciende por la margen derecha del arroyo de las Huesas hasta la carretera A-494, dirigiéndose por la margen norte de la misma, en dirección oeste, hasta el punto de coordenadas UTM, huso 30, en metros, X 163510; Y 4115915.

*Oeste:*

Desde el punto anterior asciende por la Pista de la Linde hasta Pino Galés encontrando aquí el punto de partida.

#### SUPERFICIE

Estas superficies están medidas a partir de la delimitación del ámbito territorial del Parque Natural sobre la ortofoto digital mencionada en el primer párrafo del presente Anexo.

*Superficie sector Norte:* 17.723 ha.

*Superficie sector Este:* 13.766 ha.

*Superficie sector Sur:* 3.495 ha.

*Superficie sector Oeste:* 18.851 ha.

*Superficie total:* 53.835 ha.

#### MUNICIPIOS

Sanlúcar de Barrameda, en la provincia de Cádiz, Almonte, Hinojos, Lucena del Puerto, Moguer y Palos de la Frontera, en la provincia de Huelva y Aznalcázar, Isla Mayor, Pilas, La Puebla del Río y Villamanrique de la Condesa, en la provincia de Sevilla.

#### PROVINCIAS

Cádiz, Huelva y Sevilla.
