# Supplementary material
Source: MDPI journal article supplement (https://www.mdpi.com/2220-9964/10/9/630)
Supplement: s1 [file s1]

PLAN DE ORDENACIÓN DE LOS RECURSOS NATURALES DEL PARQUE NATURAL DE DOÑANA

Límite y Zonificación 1018(2-1)

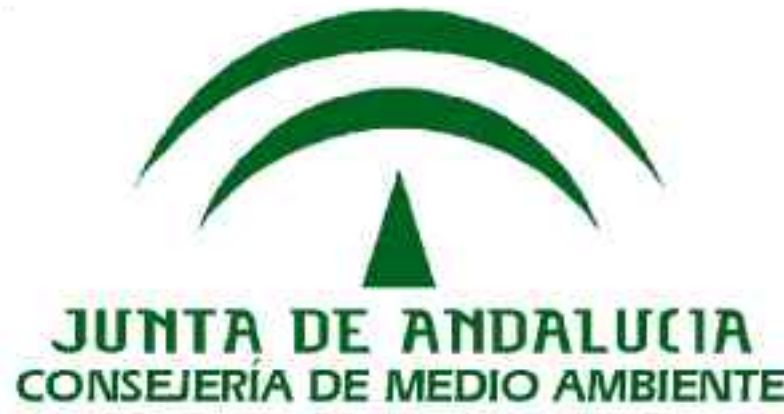

Leyenda

Límite Parque Natural

ZONIFICACIÓN

Zonas de reserva

Zonas de regulación especial

Terrenos de monte

Marisma no explotada

Marisma explotada

Zonas de regulación común

Cultivos agrícolas

Áreas con edificaciones

Explotación acuícola intensiva

Mapa de localización

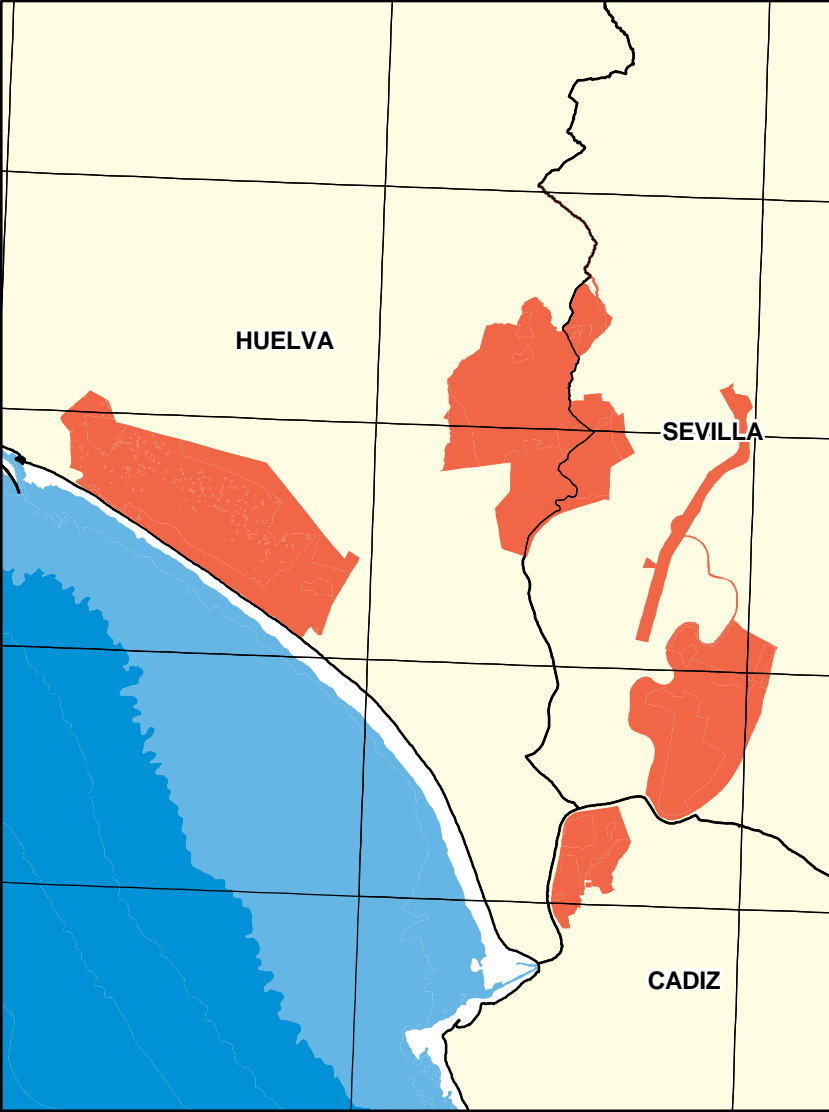

Distribución de hojas M.T.A. 1:10.000

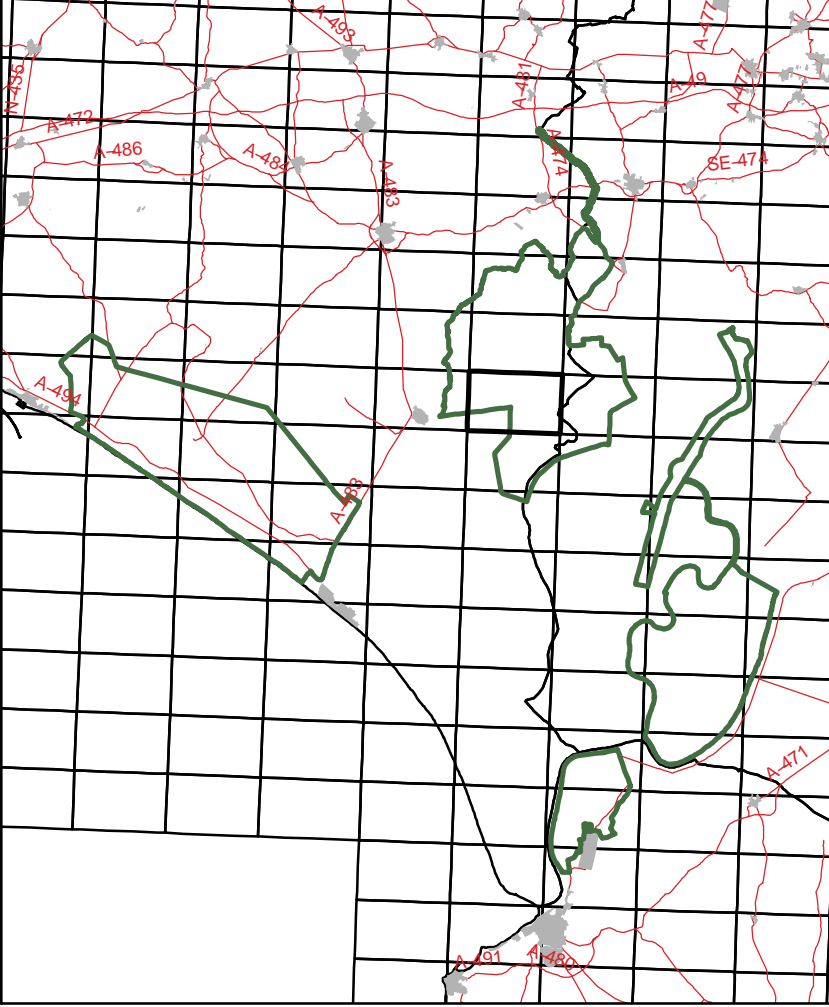

PLAN DE ORDENACIÓN DE LOS RECURSOS NATURALES DEL PARQUE NATURAL DE DOÑANA

Límite y Zonificación

| Hoja nº:  | Plano nº: |
|-----------|-----------|
| 1018(2-1) | 18        |

Fuente: Ortoimagen B/N  
(Junta de Andalucía, 2.001 –2.002)

Escala: E: 1/1'0000 U.T.M. (huso 30)
