# Supplementary material
Source: MDPI journal article supplement (https://www.mdpi.com/2220-9964/10/9/630)
Supplement: s1 [file s1]

## Límite y Zonificación 1018(2-2)

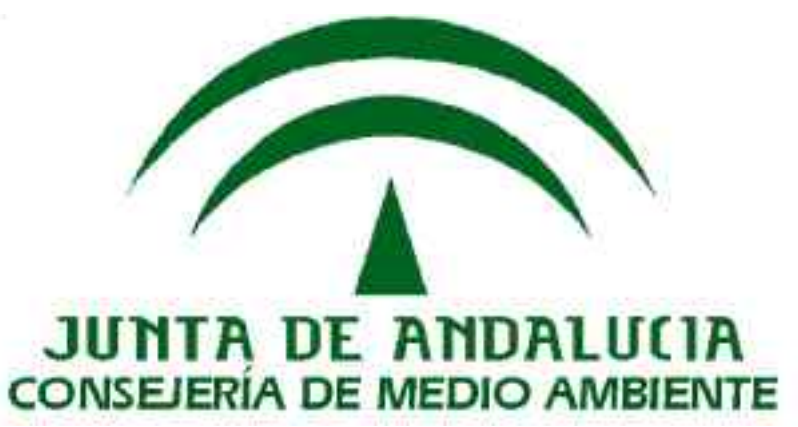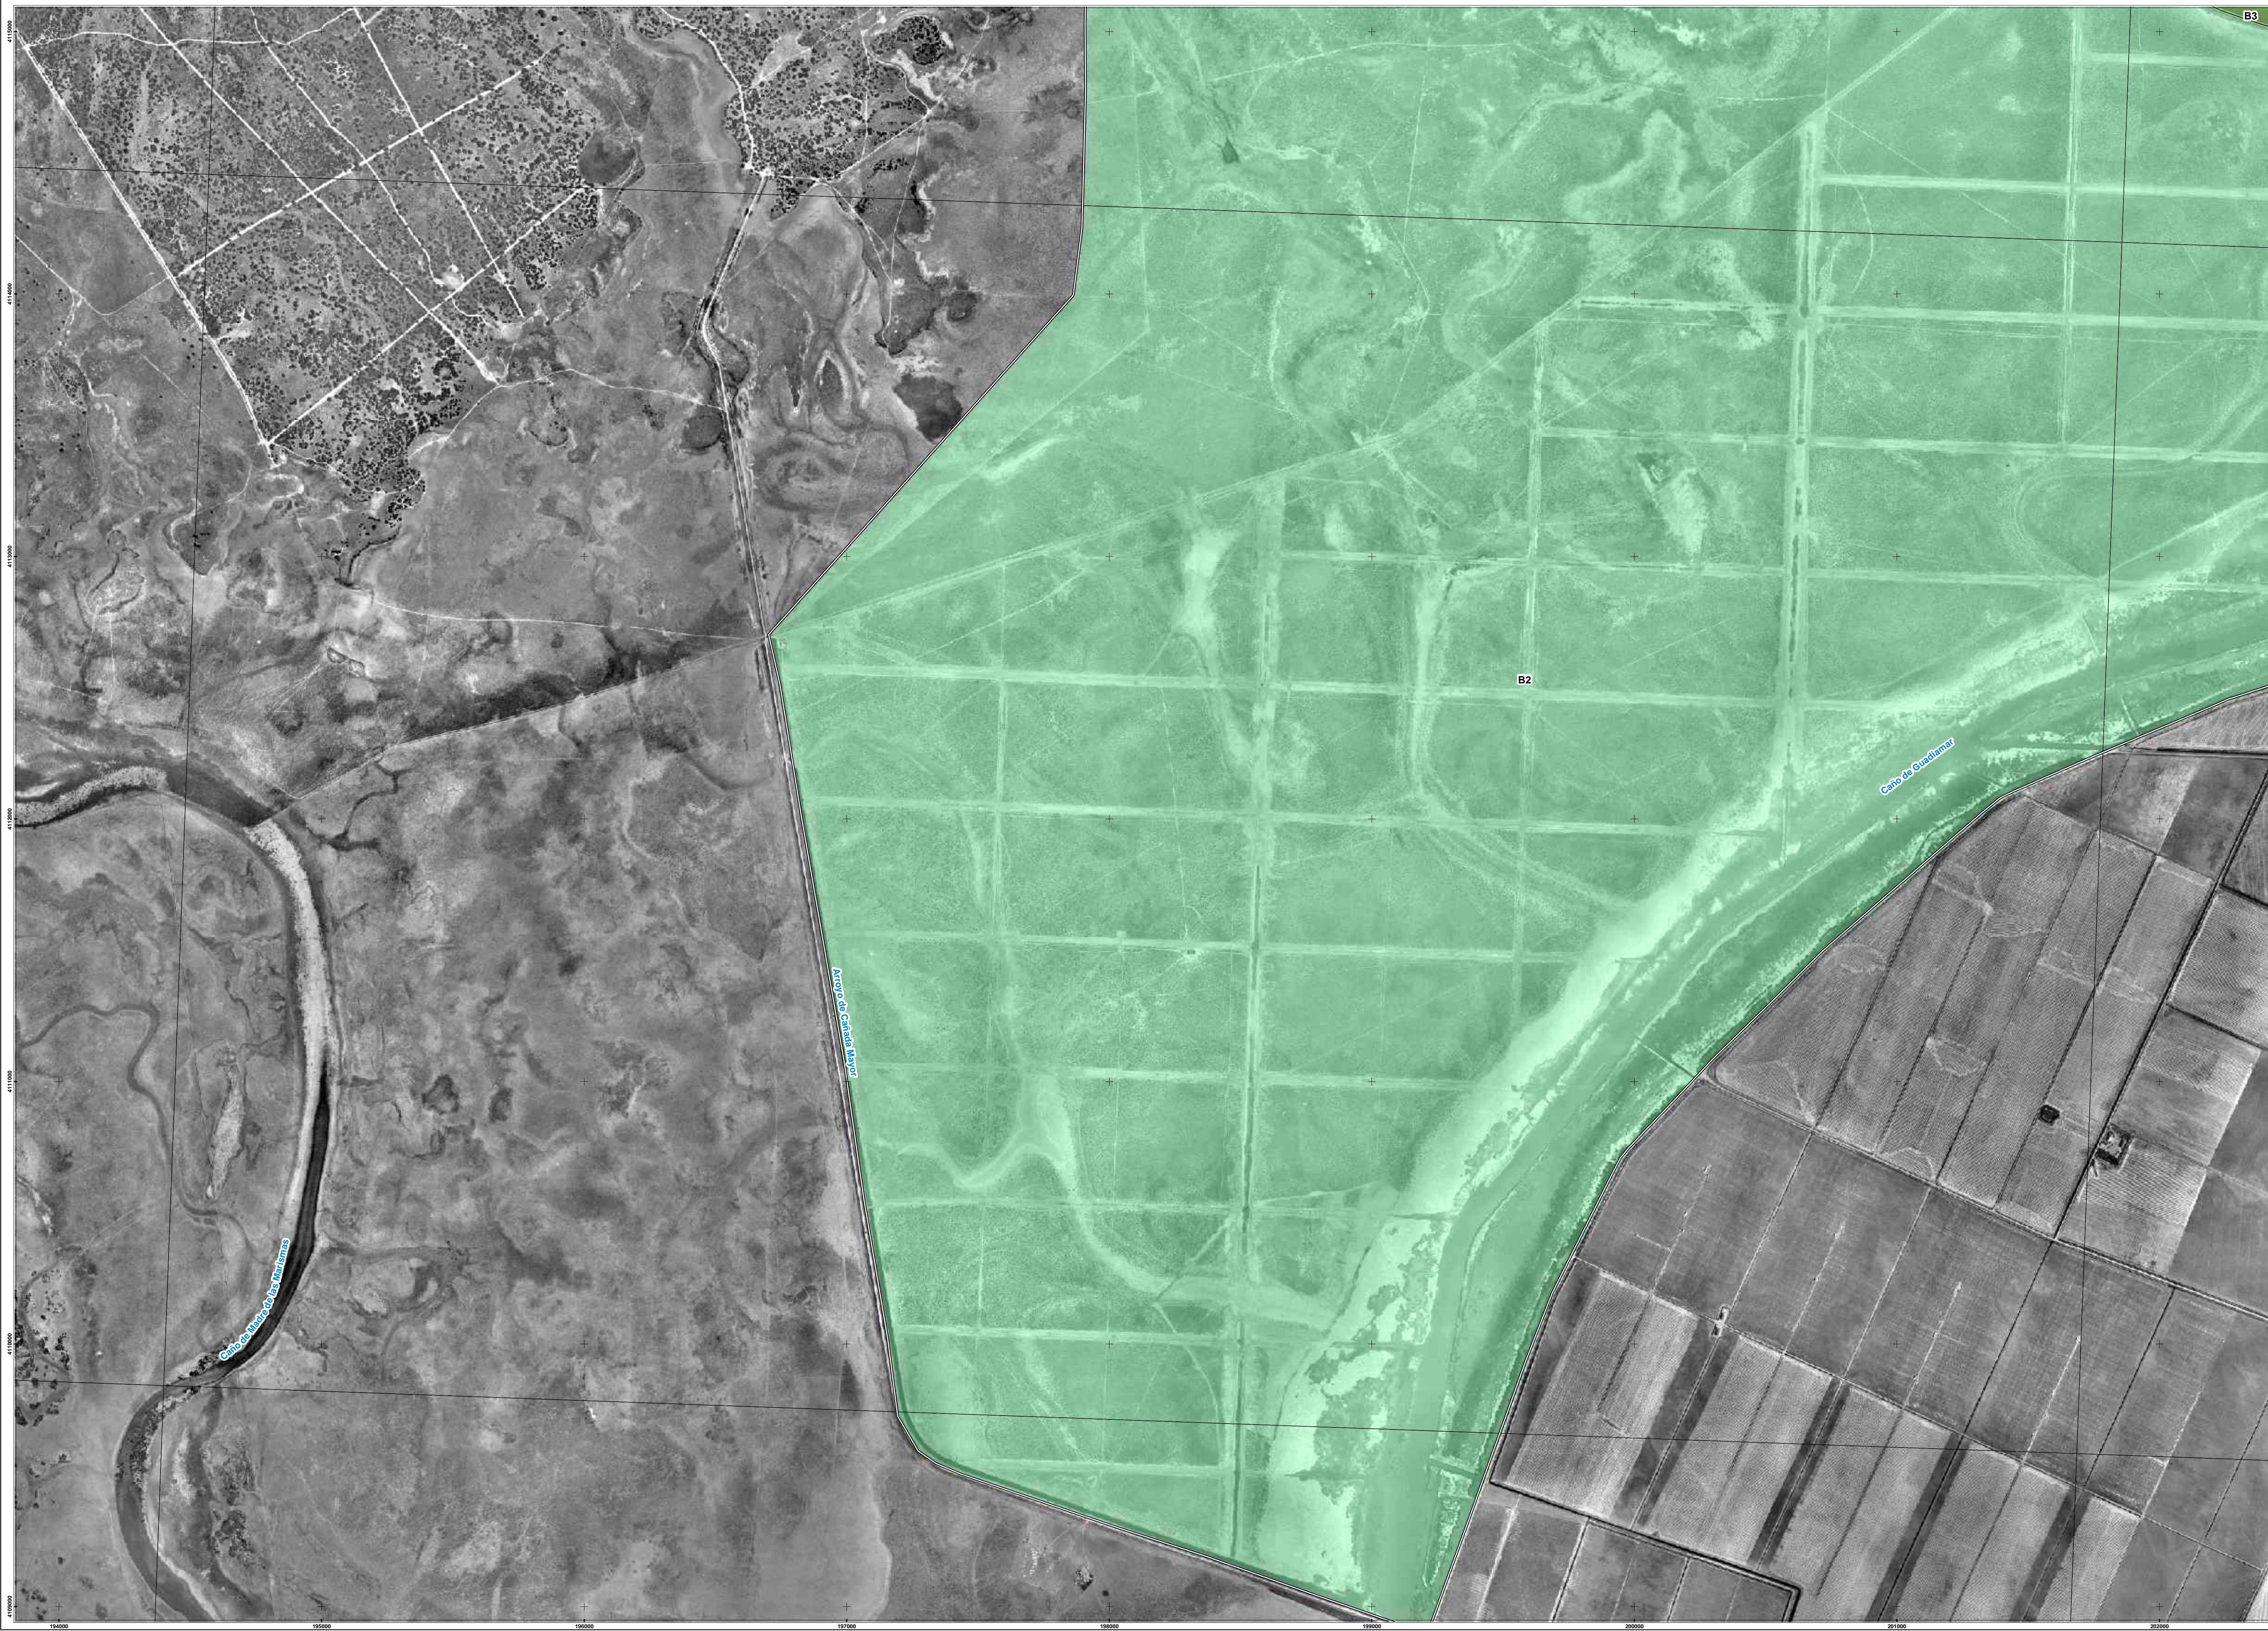

Límite Parque Natural

## UNIFICACIÓN

**A** Zonas de reserva

### Zonas de regulación especial

**B1** Terrenos de monte

**B2** Marisma no explotada

**B3** Marisma explotada

### Zonas de regulación común

**C1** Cultivos agrícolas

**C2** Áreas con edificaciones

**C3** Explotación acuícola intensiva

### Límite y Zonificación

Hoja nº:

|           |  |
|-----------|--|
| Plano nº: |  |
|-----------|--|

Fuente:  
Ortoimagen B/N  
(Junta de Andalucía, 2.001 –2.002)

**Escala:**



100 50 0 100 200 300 400 500 600 700 800 m

E: 1/10000 U.T.M. (huso 30)
