# Supplementary material
Source: MDPI journal article supplement (https://www.mdpi.com/2220-9964/10/9/630)
Supplement: s1 [file s1]

PLAN DE ORDENACIÓN DE LOS RECURSOS NATURALES DEL PARQUE NATURAL DE DOÑANA

Límite y Zonificación 1018(4-2)

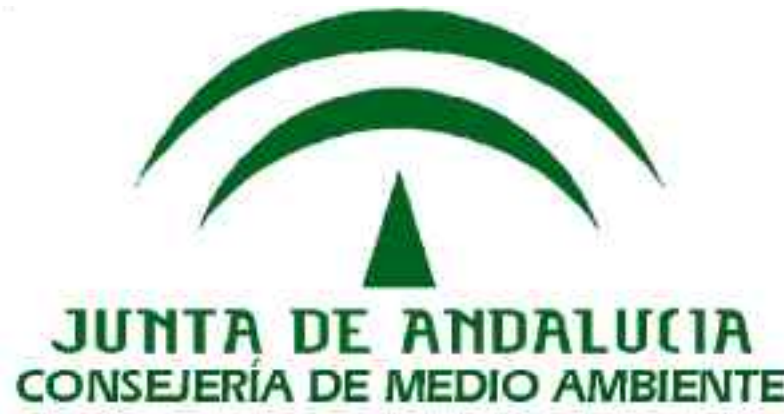

Leyenda

Límite Parque Natural

ZONIFICACIÓN

**A** Zonas de reserva

Zonas de regulación especial

**B1** Terrenos de monte

**B2** Marisma no explotada

**B3** Marisma explotada

Zonas de regulación común

**C1** Cultivos agrícolas

**C2** Áreas con edificaciones

**C3** Explotación acuícola intensiva

Mapa de localización

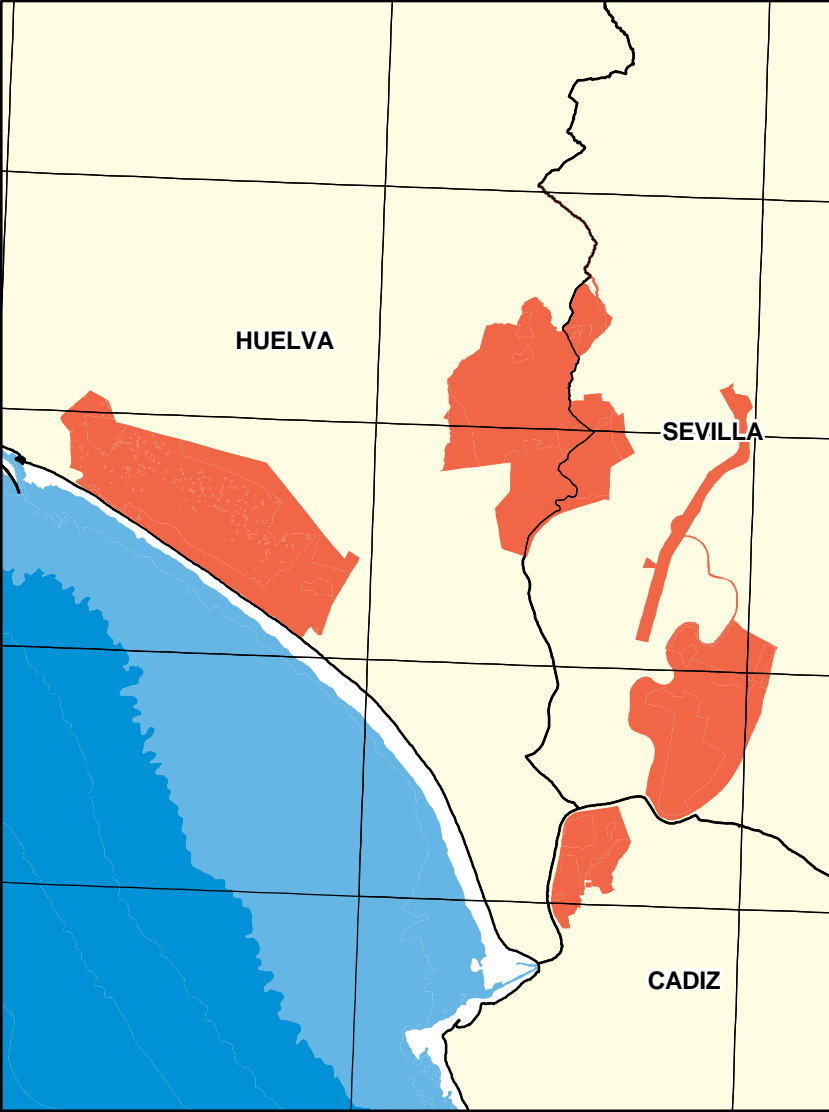

Distribución de hojas M.T.A. 1:10.000

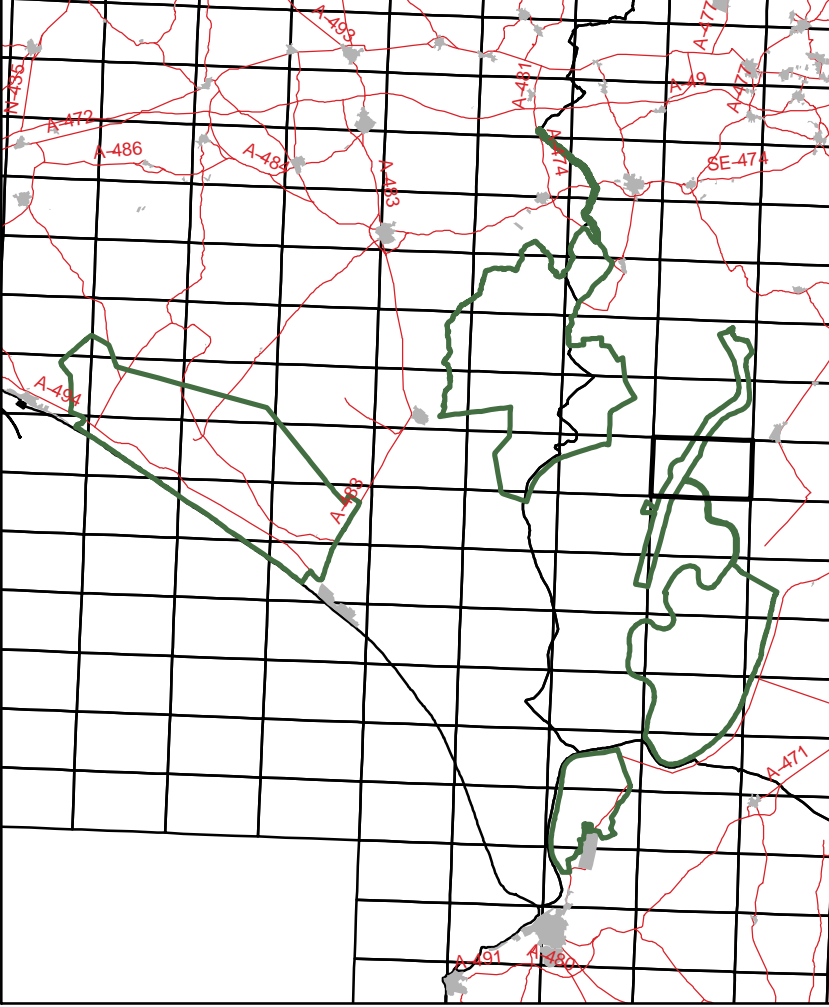

PLAN DE ORDENACIÓN DE LOS RECURSOS NATURALES DEL PARQUE NATURAL DE DOÑANA

Límite y Zonificación

| Hoja nº:  | Plano nº: |
|-----------|-----------|
| 1018(4-2) | 27        |

Fuente: Ortoimagen B/N  
(Junta de Andalucía, 2.001 –2.002)

Escala: E: 1/11.000 U.T.M. (huso 30)
