# Supplementary material
Source: MDPI journal article supplement (https://www.mdpi.com/2220-9964/10/9/630)
Supplement: s1 [file s1]

PLAN DE ORDENACIÓN DE LOS RECURSOS NATURALES DEL PARQUE NATURAL DE DOÑANA

Límite y Zonificación 983(2-4)

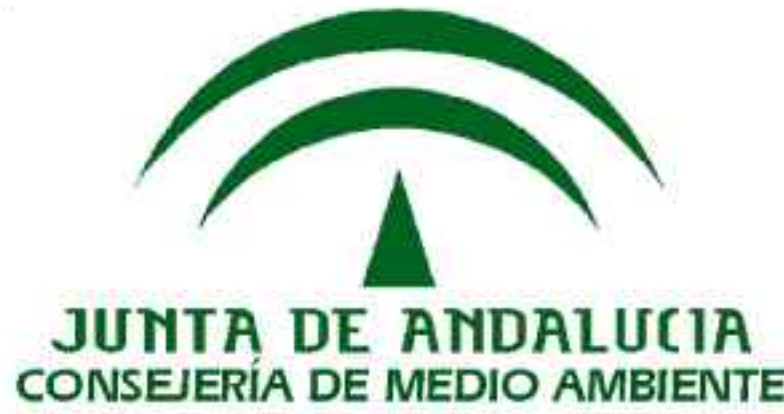

Leyenda

 Límite Parque Natural

ZONIFICACIÓN

 Zonas de reserva

Zonas de regulación especial

 Terrenos de monte

 Marisma no explotada

 Marisma explotada

Zonas de regulación común

 Cultivos agrícolas

 Áreas con edificaciones

 Explotación acuícola intensiva

Mapa de localización

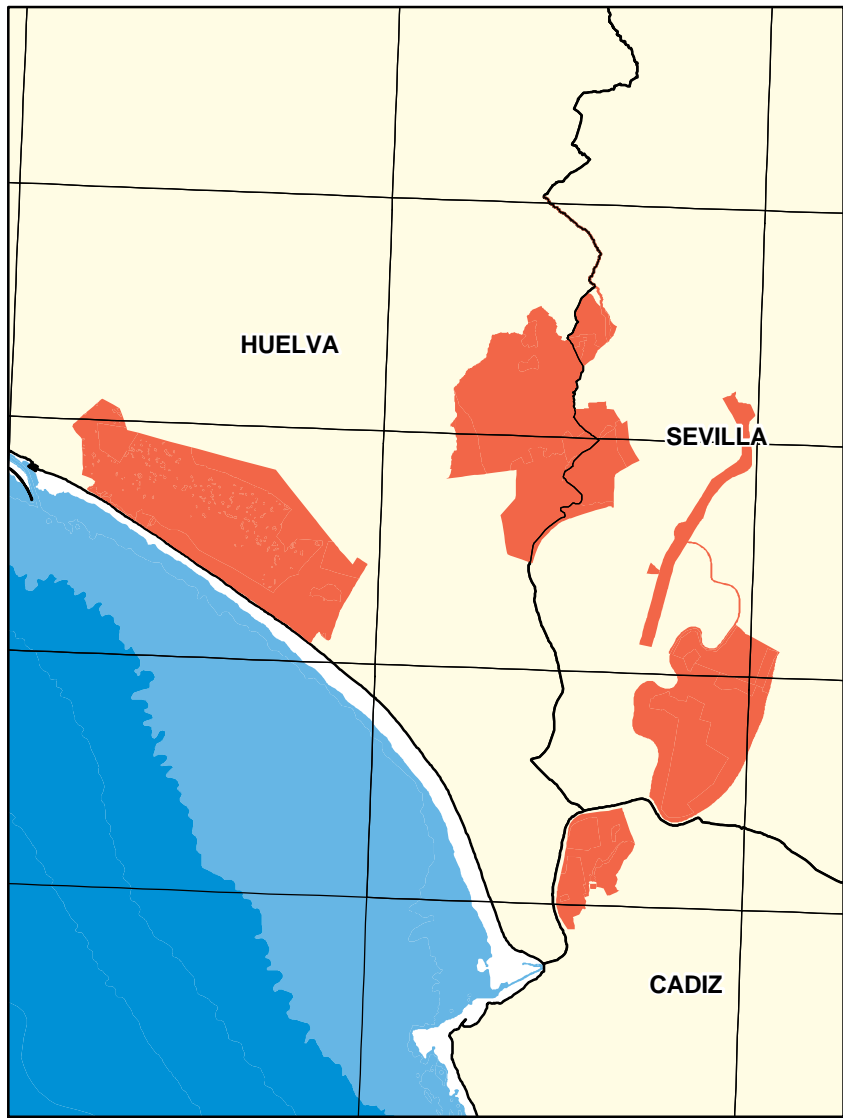

Distribución de hojas M.T.A. 1:10.000

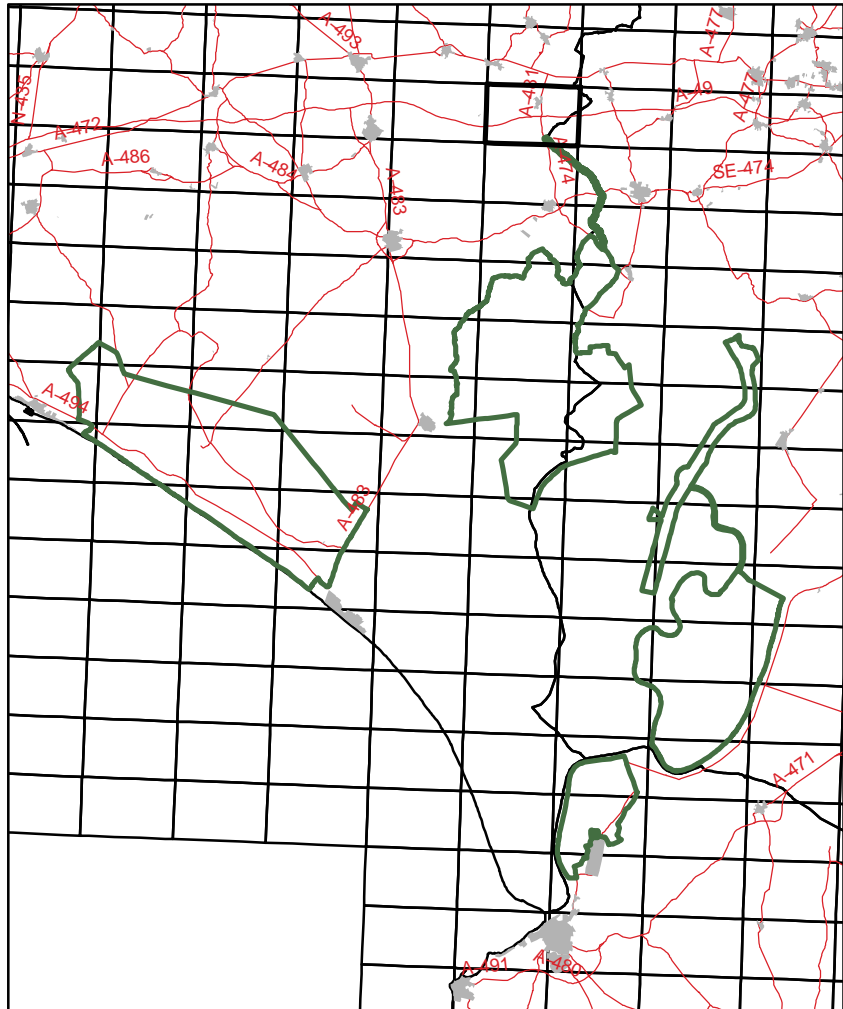

PLAN DE ORDENACIÓN DE LOS RECURSOS NATURALES DEL PARQUE NATURAL DE DOÑANA

Límite y Zonificación

| Hoja nº: | Plano nº: |
|----------|-----------|
| 983(2-4) | 0         |

Fuente: Ortoimagen B/N  
(Junta de Andalucía, 2.001 -2.002)

Escala: 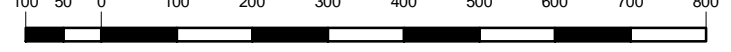 1:11.000 U.T.M. (huso 30)
