# Supplementary material
Source: MDPI journal article supplement (https://www.mdpi.com/2220-9964/10/9/630)
Supplement: s1 [file s1]

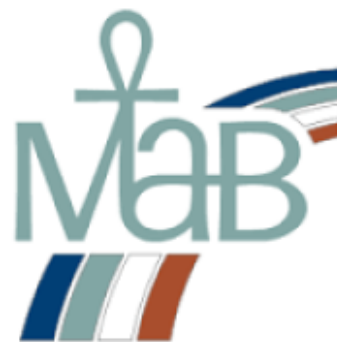

## Zonificación Reserva de la Biosfera de Doñana, Andalucía

[Página de Metadatos](#) | [Página de Metadatos \(XML\)](#)  
| [Visualization service URL \(WMS\) \(WMS de Zonificación de las Reservas de la Biosfera en Andalucía\)](#) |

|               |                                                                                                                                                                                                                                                                                                                                                                                                                                                                                                                                                                                                                                                                                                                                                                                                                                                                                                                                                                                                                                                                                                                                                                                                                                                                                                                                                                                                                                                                                                                                                                                                                                                                                                         |
|---------------|---------------------------------------------------------------------------------------------------------------------------------------------------------------------------------------------------------------------------------------------------------------------------------------------------------------------------------------------------------------------------------------------------------------------------------------------------------------------------------------------------------------------------------------------------------------------------------------------------------------------------------------------------------------------------------------------------------------------------------------------------------------------------------------------------------------------------------------------------------------------------------------------------------------------------------------------------------------------------------------------------------------------------------------------------------------------------------------------------------------------------------------------------------------------------------------------------------------------------------------------------------------------------------------------------------------------------------------------------------------------------------------------------------------------------------------------------------------------------------------------------------------------------------------------------------------------------------------------------------------------------------------------------------------------------------------------------------|
| Título        | Zonificación Reserva de la Biosfera de Doñana, Andalucía                                                                                                                                                                                                                                                                                                                                                                                                                                                                                                                                                                                                                                                                                                                                                                                                                                                                                                                                                                                                                                                                                                                                                                                                                                                                                                                                                                                                                                                                                                                                                                                                                                                |
| Fecha         | 2013-03-15                                                                                                                                                                                                                                                                                                                                                                                                                                                                                                                                                                                                                                                                                                                                                                                                                                                                                                                                                                                                                                                                                                                                                                                                                                                                                                                                                                                                                                                                                                                                                                                                                                                                                              |
| Tipo de fecha | Creación                                                                                                                                                                                                                                                                                                                                                                                                                                                                                                                                                                                                                                                                                                                                                                                                                                                                                                                                                                                                                                                                                                                                                                                                                                                                                                                                                                                                                                                                                                                                                                                                                                                                                                |
| Resumen       | <p>La figura de Reserva de la Biosfera se otorga a espacios que cuentan con una riqueza natural y cultural representativas de los distintos ecosistemas del globo terráqueo. Este galardón lo concede la UNESCO, en el marco del programa MaB (Hombre y Biosfera). El territorio de una Reserva de Biosfera se divide en tres zonas según su nivel de protección: La zona núcleo: Está compuesta por ecosistemas mínimamente perturbados y característicos de una región del mundo. Un área núcleo tiene protección legal segura, y en ella sólo se permiten actividades no destructivas y que no afecten adversamente los procesos naturales del ecosistema. Esta zona debe asegurar la protección a largo plazo de la biodiversidad in situ.</p> <ul style="list-style-type: none"><li>· La zona Tapón: Está comprendida por aquellos espacios dónde sólo pueden realizarse actividades que contribuyan a los múltiples objetivos de la Reserva. Estas actividades corresponden a investigación científica, educación y formación ambiental, así como actividades turísticas, recreativas, uso tradicional de la tierra y como zona cultural estable.</li><li>· La zona de transición: Es la parte más lejana de la zona núcleo y no está demarcada, pero corresponde a una dinámica y siempre expansiva zona de cooperación, donde el trabajo de la Reserva de la Biosfera es aplicado discretamente a las necesidades de las comunidades locales de la región. Así, la zona de transición puede contener asentamientos, campos, pastizales y bosques, y en ella se desarrollan actividades económicas que están en armonía con el medio ambiente natural y con la Reserva de la Biosfera.</li></ul> |

|                        |                   |
|------------------------|-------------------|
| Código                 | Sin identificador |
| Idioma                 | spa               |
| Conjunto de caracteres | UTF8              |
| Hierarchy level        | Conjunto de datos |

### OnLine resource

|           |                                                                                                                                                                                                                                                                                                                                                       |
|-----------|-------------------------------------------------------------------------------------------------------------------------------------------------------------------------------------------------------------------------------------------------------------------------------------------------------------------------------------------------------|
| Linkage   | <a href="http://www.juntadeandalucia.es/medioambiente/mapwms/REDIAM_zonificacion_RdB?">http://www.juntadeandalucia.es/medioambiente/mapwms/REDIAM_zonificacion_RdB?</a>                                                                                                                                                                               |
| Protocolo | OGC:WMS-1.3.0-http-get-map                                                                                                                                                                                                                                                                                                                            |
| Linkage   | <a href="http://lajunta.es/12fuk">http://lajunta.es/12fuk</a>                                                                                                                                                                                                                                                                                         |
| Protocolo | WWW:LINK-1.0-http--related                                                                                                                                                                                                                                                                                                                            |
| Linkage   | <a href="http://www.cma.junta-andalucia.es/medioambiente/portal_web/rediam/productos/ServiciosOGC/KML/Cartografia_ambiental/Planificacion/zonificacion_reservas_biosfera.kml">http://www.cma.junta-andalucia.es/medioambiente/portal_web/rediam/productos/ServiciosOGC/KML/Cartografia_ambiental/Planificacion/zonificacion_reservas_biosfera.kml</a> |
| Protocolo | WWW:LINK-1.0-http--related                                                                                                                                                                                                                                                                                                                            |
| Linkage   | <a href="http://www.juntadeandalucia.es/medioambiente/servtorrent/informacionambiental/09_PLANIFICACION/02_PLANIFICACION_ENP/01_PORN/Zonificacion_RdB_Donana.tar.gz">http://www.juntadeandalucia.es/medioambiente/servtorrent/informacionambiental/09_PLANIFICACION/02_PLANIFICACION_ENP/01_PORN/Zonificacion_RdB_Donana.tar.gz</a>                   |

|           |                            |
|-----------|----------------------------|
| Protocolo | WWW:LINK-1.0-http--related |
|-----------|----------------------------|

Punto de contacto

|                           |                                                                              |
|---------------------------|------------------------------------------------------------------------------|
| Nombre de la organización | Consejería de Medio Ambiente y Ordenación del Territorio. Junta de Andalucía |
| Position name             | Servicio Coordinación y Gestión RENPA                                        |
| Función                   | Autor                                                                        |
| Tema o categoría          | Límites                                                                      |
| Tema o categoría          | Environment                                                                  |
| Tema o categoría          | Location                                                                     |

Palabra clave

|               |                                                                                           |
|---------------|-------------------------------------------------------------------------------------------|
| Palabra clave | zonificación                                                                              |
| Palabra clave | reservas de la biosfera                                                                   |
| Palabra clave | biosfera                                                                                  |
| Palabra clave | Espacios protegidos                                                                       |
| Tipo          | Tema                                                                                      |
| Palabra clave | Zonas sujetas a ordenación, a restricciones o reglamentaciones y unidades de notificación |
| Tipo          | Tema                                                                                      |

Extensión

Delimitación de la envolvente geográfica

|                                 |              |
|---------------------------------|--------------|
| Longitud Oeste de la envolvente | -6.838472179 |
| Longitud Este de la envolvente  | -6.11960332  |
| Latitud Sur de la envolvente    | 36.758535615 |
| Latitud Norte de la envolvente  | 37.391961775 |

Spatial resolution

|                  |       |
|------------------|-------|
| Factor de escala | 50000 |
|------------------|-------|

Lineage

|                                                                                 |                                                                                                                                                                                                                                                                                                                                                                                                                                                                                                                                                                                                                                  |
|---------------------------------------------------------------------------------|----------------------------------------------------------------------------------------------------------------------------------------------------------------------------------------------------------------------------------------------------------------------------------------------------------------------------------------------------------------------------------------------------------------------------------------------------------------------------------------------------------------------------------------------------------------------------------------------------------------------------------|
| Declaración                                                                     | Para la zonificación se ha tenido en cuenta los valores medioambientales y paisajísticos así como los intrínsecos que posibilitan el desarrollo socioeconómico del territorio. Se ha utilizando para ello la antigua zonificación de la Reserva de la Biosfera, los usos del suelo actuales del CORINE landcover, los hábitats de interés comunitario, Cobertura de Montes Públicos, los censos realizados por la Consejería de Agricultura, Pesca y Alimentación, los diagnósticos de los Planes de Desarrollo Sostenible, la cartografía de los bienes culturales y el Plan de Ordenación del Territorio del Ámbito de Doñana. |
| DescripciónDescription of the event, including related parameters or tolerances |                                                                                                                                                                                                                                                                                                                                                                                                                                                                                                                                                                                                                                  |

Resource constraints

|                           |                                                                |
|---------------------------|----------------------------------------------------------------|
| Use limitation            | Para saber la licencia hay que mirar el campo de acceso y uso. |
| Use limitation            | Creative Commons Attribution 4.0 International Public License  |
| Archivo de identificación | a027119b-d4cb-4891-a613-90ae662b6b07                           |
| Idioma                    | spa                                                            |
| Conjunto de caracteres    | UTF8                                                           |

Autor de los metadatos

|                           |                                                                              |
|---------------------------|------------------------------------------------------------------------------|
| Nombre de la organización | Consejería de Medio Ambiente y Ordenación del Territorio. Junta de Andalucía |
|---------------------------|------------------------------------------------------------------------------|

|                   |                     |
|-------------------|---------------------|
| Función           | Autor               |
| Fecha de creación | 2016-11-02T15:13:16 |
