# Supplementary material
Source: MDPI journal article supplement (https://www.mdpi.com/2220-9964/10/9/630)
Supplement: s1 [file s1]

PLAN DE ORDENACIÓN DE LOS RECURSOS NATURALES DEL PARQUE NATURAL DE DOÑANA

Límite y Zonificación 1018(4-1)

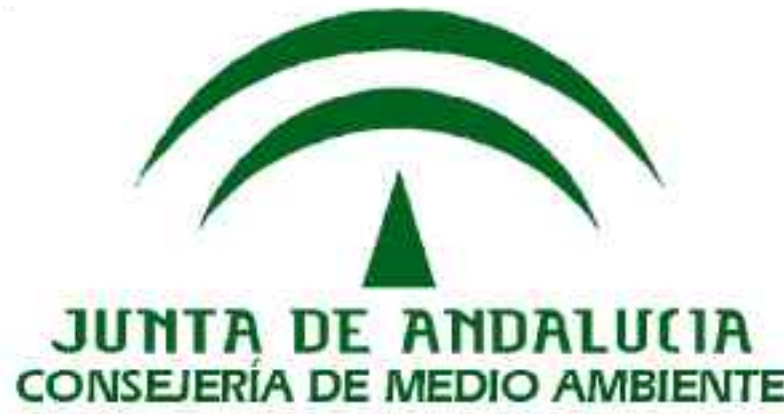

Leyenda

- Límite Parque Natural
- ZONIFICACIÓN
- Zonas de reserva
- Zonas de regulación especial
- Terrenos de monte
- Marisma no explotada
- Marisma explotada
- Zonas de regulación común
- Cultivos agrícolas
- Áreas con edificaciones
- Explotación acuícola intensiva

Mapa de localización

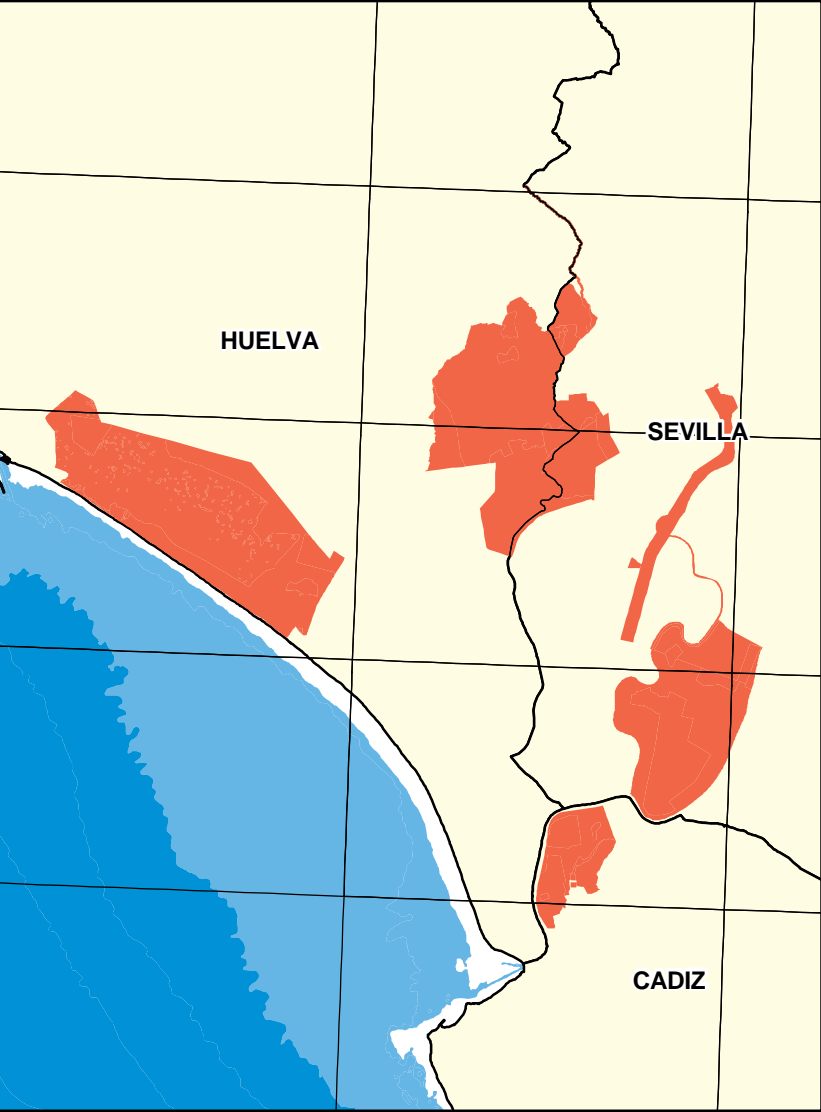

Distribución de hojas M.T.A. 1:10.000

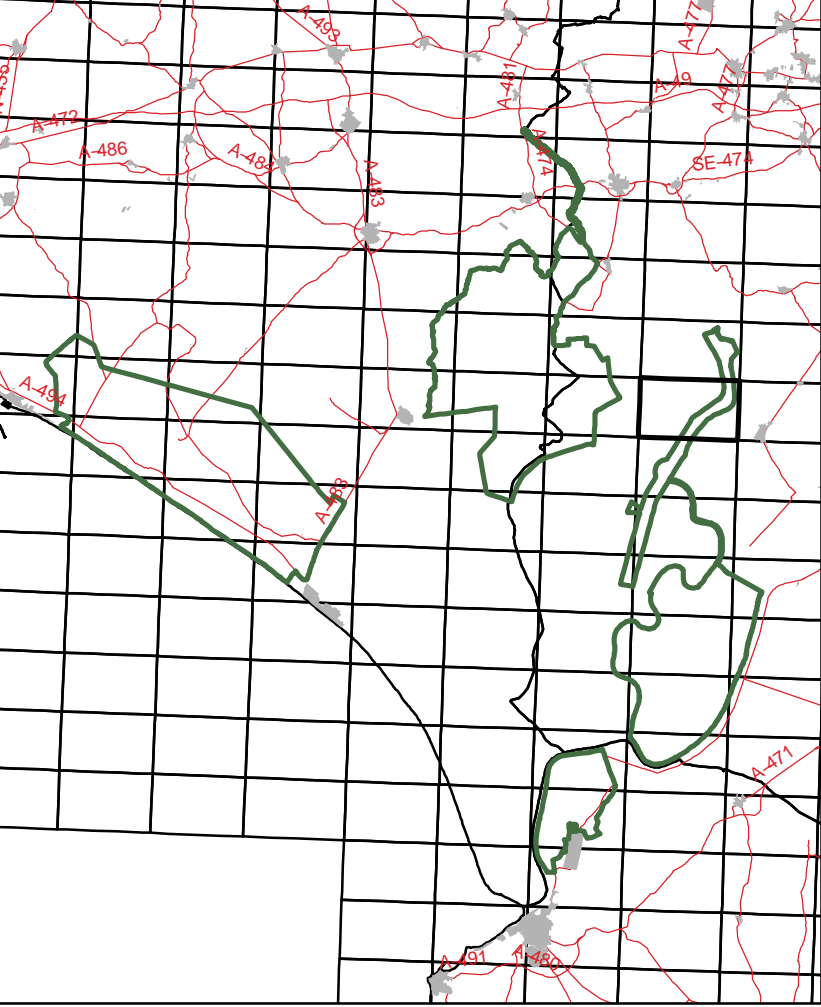

PLAN DE ORDENACIÓN DE LOS RECURSOS NATURALES DEL PARQUE NATURAL DE DOÑANA

Límite y Zonificación

| Hoja nº:  | Plano nº: |
|-----------|-----------|
| 1018(4-1) | 20        |

Fuente: Ortoimagen B/N  
(Junta de Andalucía, 2.001 –2.002)

Escala: 1:10.000 U.T.M. (huso 30)
