# Supplementary material
Source: MDPI journal article supplement (https://www.mdpi.com/2220-9964/10/9/630)
Supplement: s1 [file s1]

## **MEDIO AMBIENTE**

### **DECRETO 97/2005, DE 11 DE ABRIL, POR EL QUE SE ESTABLECE LA ORDENACIÓN DEL PARQUE NACIONAL Y PARQUE NATURAL DE DOÑANA**

#### **PREÁMBULO**

El gran ecosistema litoral de Doñana constituye uno de los complejos fluviolitorales más importantes de Europa, cuya superficie protegida la constituyen el Parque Natural y el Parque Nacional de Doñana. El Parque Natural de Doñana se extiende sobre una superficie de 53.835 ha, en cuatro sectores discontinuos situados alrededor del Parque Nacional, cuya superficie es de 54.252 ha, incluyendo principalmente zonas de marisma en diferente grado de transformación, así como una importante representación de formaciones forestales, matorral mediterráneo y complejos lagunares.

En el año 1980 Doñana fue designada por la UNESCO Reserva de la Biosfera, que incluye la totalidad del Parque Nacional y parcialmente terrenos del Parque Natural, por acoger una muestra representativa de distintos ecosistemas, tales como marismas continentales, arenales y complejos de dunas litorales, tanto fijas como móviles, así como playas y una porción del estuario del Guadalquivir.

Por otra parte, al ser Doñana el mayor humedal de Europa y por su cercanía con el Estrecho de Gibraltar, es un lugar estratégico para la invernada y migración de aves entre África y Europa. El Acuerdo sobre la Conservación de las Aves Acuáticas Migratorias Afroeuroasiáticas, hecho en La Haya el 15 de agosto de 1996 y ratificado por España mediante Instrumento de 12 de marzo de 2001, reconoce la vulnerabilidad de estas aves porque, al migrar a lo largo de grandes distancias, son dependientes de redes de humedales, ecosistemas que tienen una extensión cada vez menor y se están degradando como consecuencia de actividades humanas no sostenibles. Asimismo, en mayo de 1982 España ratifica el Convenio Ramsar e incluye el Parque Nacional de Doñana en la lista de zonas húmedas de importancia internacional como hábitat de aves acuáticas. Por su parte, en enero de 2005 la propuesta como zona RAMSAR del Parque Natural de Doñana recibió el visto bueno por parte del Comité Nacional de Humedales.

El citado Parque Natural ha sido designado en 2002 como Zona de Especial Protección para las Aves (ZEPA) conforme a la Directiva 79/409/CEE, del Consejo, de 2 de abril de 1979, relativa a la conservación de las aves silvestres, por ampliación de la ZEPA de Doñana, que hasta ese momento sólo incluía el Parque Nacional. Por este motivo, ambos espacios forman parte de la red ecológica europea "Natura 2000", instaurada por la Directiva 92/43/CEE, del Consejo, de 21 de mayo de 1992, relativa a la conservación de los hábitats naturales y de la fauna y flora silvestres.

Además, tanto el Parque Nacional como el Parque Natural se encuentran incluidos en la propuesta de la Comunidad Autónoma de Andalucía de Lugares de Importancia Comunitaria (LIC), conforme a la Directiva 92/43/CEE, de 21 de mayo de 1992.

La reciente Sentencia del Tribunal Constitucional 194/2004, de 4 de noviembre, ha resuelto los recursos de inconstitucionalidad interpuestos por el Consejo de Gobierno de la Junta de Andalucía, las

Cortes de Aragón y la Diputación General de Aragón contra la Ley 41/1997, de 5 de noviembre, declarando inconstitucional la gestión conjunta por el Estado y las Comunidades Autónomas de los parques nacionales y por tanto atribuyendo a éstas últimas la gestión de los mismos, por lo que, en el caso de Andalucía, queda unificada la gestión de los Parques Nacionales y Naturales de Doñana y Sierra Nevada en una única Administración, la Junta de Andalucía, a través de la Consejería de Medio Ambiente.

Esta vocación de gestión única de un parque nacional y su parque natural de referencia había quedado patente, en el caso de Doñana, con la aprobación por el Parlamento de Andalucía de la Ley 8/1999, de 27 de octubre, del Espacio Natural Doñana, recurrida por el Estado y suspendida en su entrada en vigor por el Tribunal Constitucional. No obstante, la lectura de la STC 194/2004 y el reconocimiento de la gestión de las Comunidades Autónomas en esta materia obligan a replantearse algunas de las cuestiones del modelo que esta norma preveía dando una nueva dimensión al concepto de gestión unitaria e integrada de los dos parques nacionales y sus correspondientes parques naturales existentes en Andalucía, del que la ley 8/1999 fue pionera y una vez conocida de forma completa su encaje constitucional.

De esta forma, cada espacio, parque nacional y parque natural, tiene su régimen jurídico de protección, de acuerdo con el marco establecido para cada una de las figuras asignadas, así como unos instrumentos de planificación propios y acordes con el citado régimen de protección.

El Parque Nacional de Doñana, declarado en 1969, goza de un régimen jurídico establecido por la Ley 91/1978, de 28 de diciembre, además de un Plan Rector de Uso y Gestión, aprobado por Decreto 48/2004, de 10 de febrero del Consejo de Gobierno de la Junta de Andalucía, que constituye el primer PRUG de un Parque Nacional aprobado por una Comunidad Autónoma.

Por su parte, el Parque Natural de Doñana fue declarado por la Ley 2/1989, de 18 de julio, por la que se aprueba el Inventario de Espacios Naturales Protegidos de Andalucía y se establecen medidas adicionales para su protección, bajo la denominación de Parque Natural Entorno de Doñana. Posteriormente, mediante el Decreto 2/1997, de 7 de enero, se modificaron la denominación y los límites del citado Parque Natural, que pasó a denominarse Parque Natural de Doñana, y se aprobaron el Plan de Ordenación de los Recursos Naturales, con una vigencia de ocho años, y el Plan Rector de Uso y Gestión del Parque Natural de Doñana, con una vigencia de cuatro años, que fue prorrogada por la Orden de 14 de marzo de 2001.

En base a ello, y dado que el pronunciamiento del Tribunal Constitucional no ha afectado a las normas vigentes en materia de planificación de estos espacios, el presente Decreto da continuidad al ya citado 48/2004, de 10 de febrero, procediendo a determinados ajustes en su ordenación en lo relativo al Parque Nacional de Doñana y se centra en actualizar los instrumentos de planificación del Parque Natural de Doñana.

En cumplimiento de lo dispuesto en los artículos 13 y 18 de la Ley 2/1989, de 18 de julio, a través de este Decreto se aprueban el Plan de Ordenación de los Recursos Naturales y el Plan Rector de Uso y Gestión del Parque Natural de Doñana, documentos que se adaptan a las nuevas circunstancias ambientales y socioeconómicas que caracterizan el Parque Natural, así como al nuevo marco normativo y directrices políticas que, en materia de medio ambiente, se vienen desarrollando en el ámbito internacional y en el de la Unión Europea.

En cuanto al procedimiento seguido, el Plan de Ordenación de los Recursos Naturales y del Plan Rector de Uso y Gestión del Parque Natural de Doñana han sido elaborados por la Consejería de Medio Ambiente, informados por el Comité de Acciones para el Desarrollo Sostenible, la Junta Rectora del Parque Natural y el órgano competente en materia urbanística, sometidos a los trámites de audiencia a los interesados, información pública y consulta de los intereses sociales e institucionales implicados, incluidas las Corporaciones Locales, y de las asociaciones que persiguen el logro de los principios establecidos en el artículo 2 de la Ley 4/1989, de 27 de marzo. Cumplidos los demás trámites previstos en la Ley, han sido elevados al Consejo de Gobierno para su aprobación.

Por otra parte, de conformidad con el artículo 8.1 de la Ley 2/1989, de 18 de julio, se procede mediante el presente Decreto a ampliar el ámbito territorial del Parque Natural de Doñana, mediante la incorporación al mismo de la Zona de Protección del Parque Nacional de la carretera Almonte-Torre de la Higuera así como la inclusión de las fincas Coto II de Hato Ratón y Huerta Tejada. A su vez se incluye la franja comprendida entre la base del acantilado y la carretera A-494 desde la margen derecha del arroyo del Loro hasta la margen derecha del arroyo Las Huesas, tal como propone el Plan de Ordenación del Territorio del Ámbito de Doñana.

La ampliación, que supone la incorporación al Parque de 1.445 ha, comprende terrenos pertenecientes a los términos municipales de Almonte, Lucena del Puerto, Moguer, Aznalcázar y Villamanrique de la Condesa y reúne las características ecológicas adecuadas para ello.

Además, el Acuerdo de Consejo de Ministros de 6 de febrero de 2004 (BOE núm. 47, de 24 de febrero) ha ampliado los límites del Parque Nacional de Doñana mediante la incorporación de diferentes terrenos públicos colindantes al mismo, en su mayoría pertenecientes a la finca "Los Caracoles", situada en el término municipal de Aznalcázar, con una superficie de 2.665,4 ha, que estaba incluida en el Parque Natural.

Por ello, se procede mediante el presente Decreto a excluir del ámbito territorial del Parque Natural de Doñana la citada finca, así como a incluir en el ámbito de aplicación del Plan Rector de Uso y Gestión del Parque Nacional de Doñana, los terrenos incorporados al citado Parque Nacional por el Acuerdo de Consejo de Ministros anteriormente mencionado, procediendo a su ordenación mediante la adscripción a la zonificación correspondiente, de acuerdo con el PRUG del Parque Nacional.

En cuanto a lo que respecta al uso público del parque nacional y del parque natural, si bien la realidad territorial de cada uno de los dos parques es bien distinta, debe existir una coherencia entre los distintos equipamientos y actividades que se desarrollan, al objeto de alcanzar los objetivos comunes con la mayor eficacia, razón por la que se considera necesaria la elaboración de un único programa de uso público para los dos espacios. De la misma forma deben coordinarse y ser coherentes los distintos programas de conservación que se desarrollen para ambos espacios, así como el desarrollo de determinados aprovechamientos.

Por último, los avances tecnológicos permiten disponer actualmente de nuevos productos cartográficos que ofrecen una visión más actualizada y detallada de la realidad territorial y de los diferentes elementos que la constituyen. Por ello, con la finalidad de contribuir a la seguridad jurídica en cuanto a la delimitación territorial del Parque Natural de Doñana, mediante el presente Decreto se definen literaria y gráficamente los límites del citado espacio.

En su virtud, de conformidad con la legislación vigente, a propuesta de la Consejera de Medio Ambiente de acuerdo con lo dispuesto en el artículo 39.2 de la Ley 6/1983, de 21 de julio, del Gobierno y Administración de la Comunidad Autónoma, y previa deliberación del Consejo de Gobierno en su reunión de 11 de abril de 2005,

## **DISPONGO**

### **Artículo 1. Plan de Ordenación de los Recursos Naturales.**

1. Se aprueba el Plan de Ordenación de los Recursos Naturales del Parque Natural de Doñana, que figura como Anexo I del presente Decreto.
2. El Plan tendrá una vigencia indefinida. Podrá ser modificado y revisado en los supuestos contemplados en el apartado 5.1 del propio Plan.

## **Artículo 2. Plan Rector de Uso y Gestión.**

1. Se aprueba el Plan Rector de Uso y Gestión del Parque Natural de Doñana, que figura como Anexo II del presente Decreto.
2. El citado Plan finalizará su vigencia el mismo día que finalice la del Plan Rector de Uso y Gestión del Parque Nacional de Doñana, aprobado por Decreto 48/2004, de 10 de febrero, siendo susceptible de ser prorrogado mediante Orden del titular de la Consejería de Medio Ambiente.
3. El Plan podrá ser modificado y revisado en los supuestos contemplados en el apartado 4.1. del propio Plan.

## **Artículo 3. Gestión de hábitats naturales.**

El Plan de Ordenación de los Recursos Naturales y el Plan Rector de Uso y Gestión del Parque Natural de Doñana tendrán la consideración de Plan de Gestión a los efectos de lo establecido en el artículo 6.1 del Real Decreto 1997/1995, de 7 de diciembre, *por el que se establecen medidas para contribuir a garantizar la biodiversidad mediante la conservación de los hábitats naturales y de la fauna y flora silvestres*.

## **Artículo 4. Modificación del ámbito territorial del Parque Natural.**

1. Se modifica el ámbito territorial del Parque Natural de Doñana mediante la incorporación al citado Parque de la Zona de Protección del Parque Nacional de la carretera Almonte-Torre de la Higuera, de las fincas Coto II de Hato Ratón y Huerta Tejada, y del sector comprendido entre la base del acantilado y la carretera A-494 desde la margen derecha del arroyo del Loro hasta la margen derecha del arroyo Las Huesas, y la exclusión de la finca Los Caracoles.
2. La descripción literaria de los límites del Parque Natural queda recogida en el Anexo III del presente Decreto.
3. La representación gráfica de dichos límites a escala 1:10.000, sobre la ortofoto digital de la Junta de Andalucía, en blanco y negro, con tamaño de píxel de 0,5 metros, de fecha 2001-2002, queda recogida en el apartado 8 del Anexo I del presente Decreto.

## **Artículo 5. Plan Rector de Uso y Gestión del Parque Nacional de Doñana.**

1. Se incluyen en el ámbito de aplicación del Plan Rector de Uso y Gestión del Parque Nacional de Doñana, aprobado por Decreto 48/2004, de 10 de febrero (BOJA núm. 44, de 4 de marzo de 2004), los terrenos incorporados al citado Parque Nacional por el Acuerdo del Consejo de Ministros de 6 de febrero de 2004, publicado mediante Resolución del Organismo Autónomo Parques Nacionales de 6 de febrero de 2004 (BOE núm. 47, de 24 de febrero de 2004).
2. A efectos de la zonificación establecida en el apartado 3.2.1. del citado Plan Rector de Uso y Gestión, dichos terrenos quedan adscritos de la siguiente forma:
  - ~~///~~ La finca Los Caracoles, la totalidad del Triángulo Oeste y el subsector este de la Plana de Inundación del Arroyo del Partido, se incluyen en la "Zona de Uso Restringido".
  - ~~///~~ El subsector oeste de la Plana de Inundación del Arroyo del Partido, se incluye en la "Zona de Uso Moderado".
3. La representación gráfica de la citada adscripción se recoge en el Anexo IV del presente Decreto.

## **Artículo 6. Programa de Uso Público.**

En el plazo de un año se elaborará un Programa de Uso Público único para el Parque Nacional y Parque Natural de Doñana, cuyo contenido mínimo será acorde con lo establecido a tal efecto en los respectivos Planes Rectores de Uso y Gestión.

#### **Artículo 7. Programas de conservación y planes sectoriales.**

Los programas de conservación para los recursos naturales, así como los planes sectoriales para los aprovechamientos y actividades que se desarrollen en el ámbito de Doñana, abarcarán tanto el Parque Nacional como el Parque Natural.

#### **Disposición Derogatoria Única.**

Quedan derogados el Plan de Ordenación de los Recursos Naturales y el Plan Rector de Uso y Gestión del Parque Natural de Doñana, aprobados por el Decreto 2/1997, de 7 de enero, *por el que se modifican la denominación y límites del Parque Natural Entorno de Doñana, que pasa a denominarse Parque Natural de Doñana y se aprueban el Plan de Ordenación de los Recursos Naturales y el Plan Rector de Uso y Gestión del mismo.*

#### **Disposición Final Primera. Modificación del Decreto 239/1997, de 15 de octubre, por el que se regula la constitución, composición y funciones de las Juntas Rectoras de los Parques Naturales.**

Se modifica el Anexo 10 (Composición de la Junta Rectora del Parque Natural de Doñana) del Decreto 239/1997, de 15 de octubre. La tercera línea, donde dice "El Delegado Provincial de la Consejería de Medio Ambiente, designado por el Viceconsejero de Medio Ambiente o un representante designado por el Delegado", queda redactada en los siguientes términos:

"Los titulares de las Delegaciones Provinciales de la Consejería de Medio Ambiente de Huelva, Sevilla y Cádiz o un representante de cada uno de ellos designado por el Delegado correspondiente".

Por otra parte, se incluye como miembro de la Junta Rectora del Parque Natural de Doñana a la persona titular de la Dirección General competente en materia de Espacios Naturales Protegidos de la Consejería de Medio Ambiente.

#### **Disposición Final Segunda. Modificación del Decreto 48/2004, de 10 de febrero, por el que se aprueba el Plan Rector de Uso y Gestión del Parque Nacional de Doñana.**

Se modifica la Disposición Final Primera, que queda redactada en los siguientes términos:

"Se autoriza al titular de la Consejería de Medio Ambiente para dictar cuantas disposiciones sean precisas para el desarrollo y ejecución de lo previsto en el presente Decreto".

#### **Disposición Final Tercera. Desarrollo del Decreto.**

Se faculta al titular de la Consejería de Medio Ambiente para dictar cuantas disposiciones sean necesarias para el desarrollo y ejecución de lo previsto en el presente Decreto.

**Disposición Final Cuarta. Entrada en vigor.**

El presente Decreto entrará en vigor el día siguiente al de su publicación en el Boletín Oficial de la Junta de Andalucía.

Sevilla, 11 de abril de 2005

MANUEL CHAVES GONZÁLEZ  
Presidente de la Junta de Andalucía

FUENSANTA COVES BOTELLA  
Consejera de Medio Ambiente
