# Supplementary material
Source: MDPI journal article supplement (https://www.mdpi.com/2220-9964/10/9/630)
Supplement: s1 [file s1]

PLAN DE ORDENACIÓN DE LOS RECURSOS NATURALES DEL PARQUE NATURAL DE DOÑANA

Límite y Zonificación 1001(3-4)

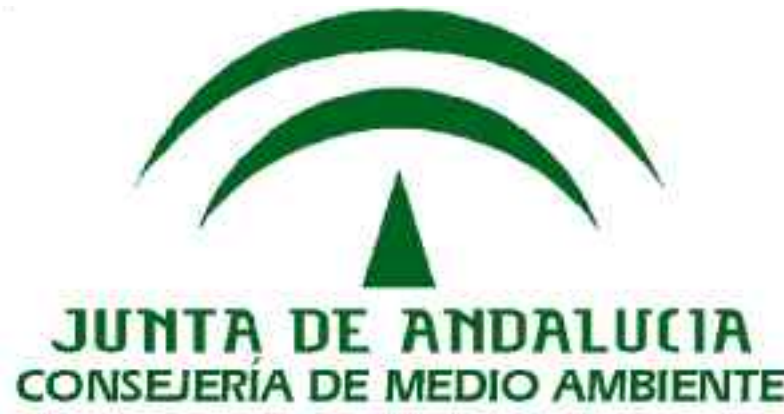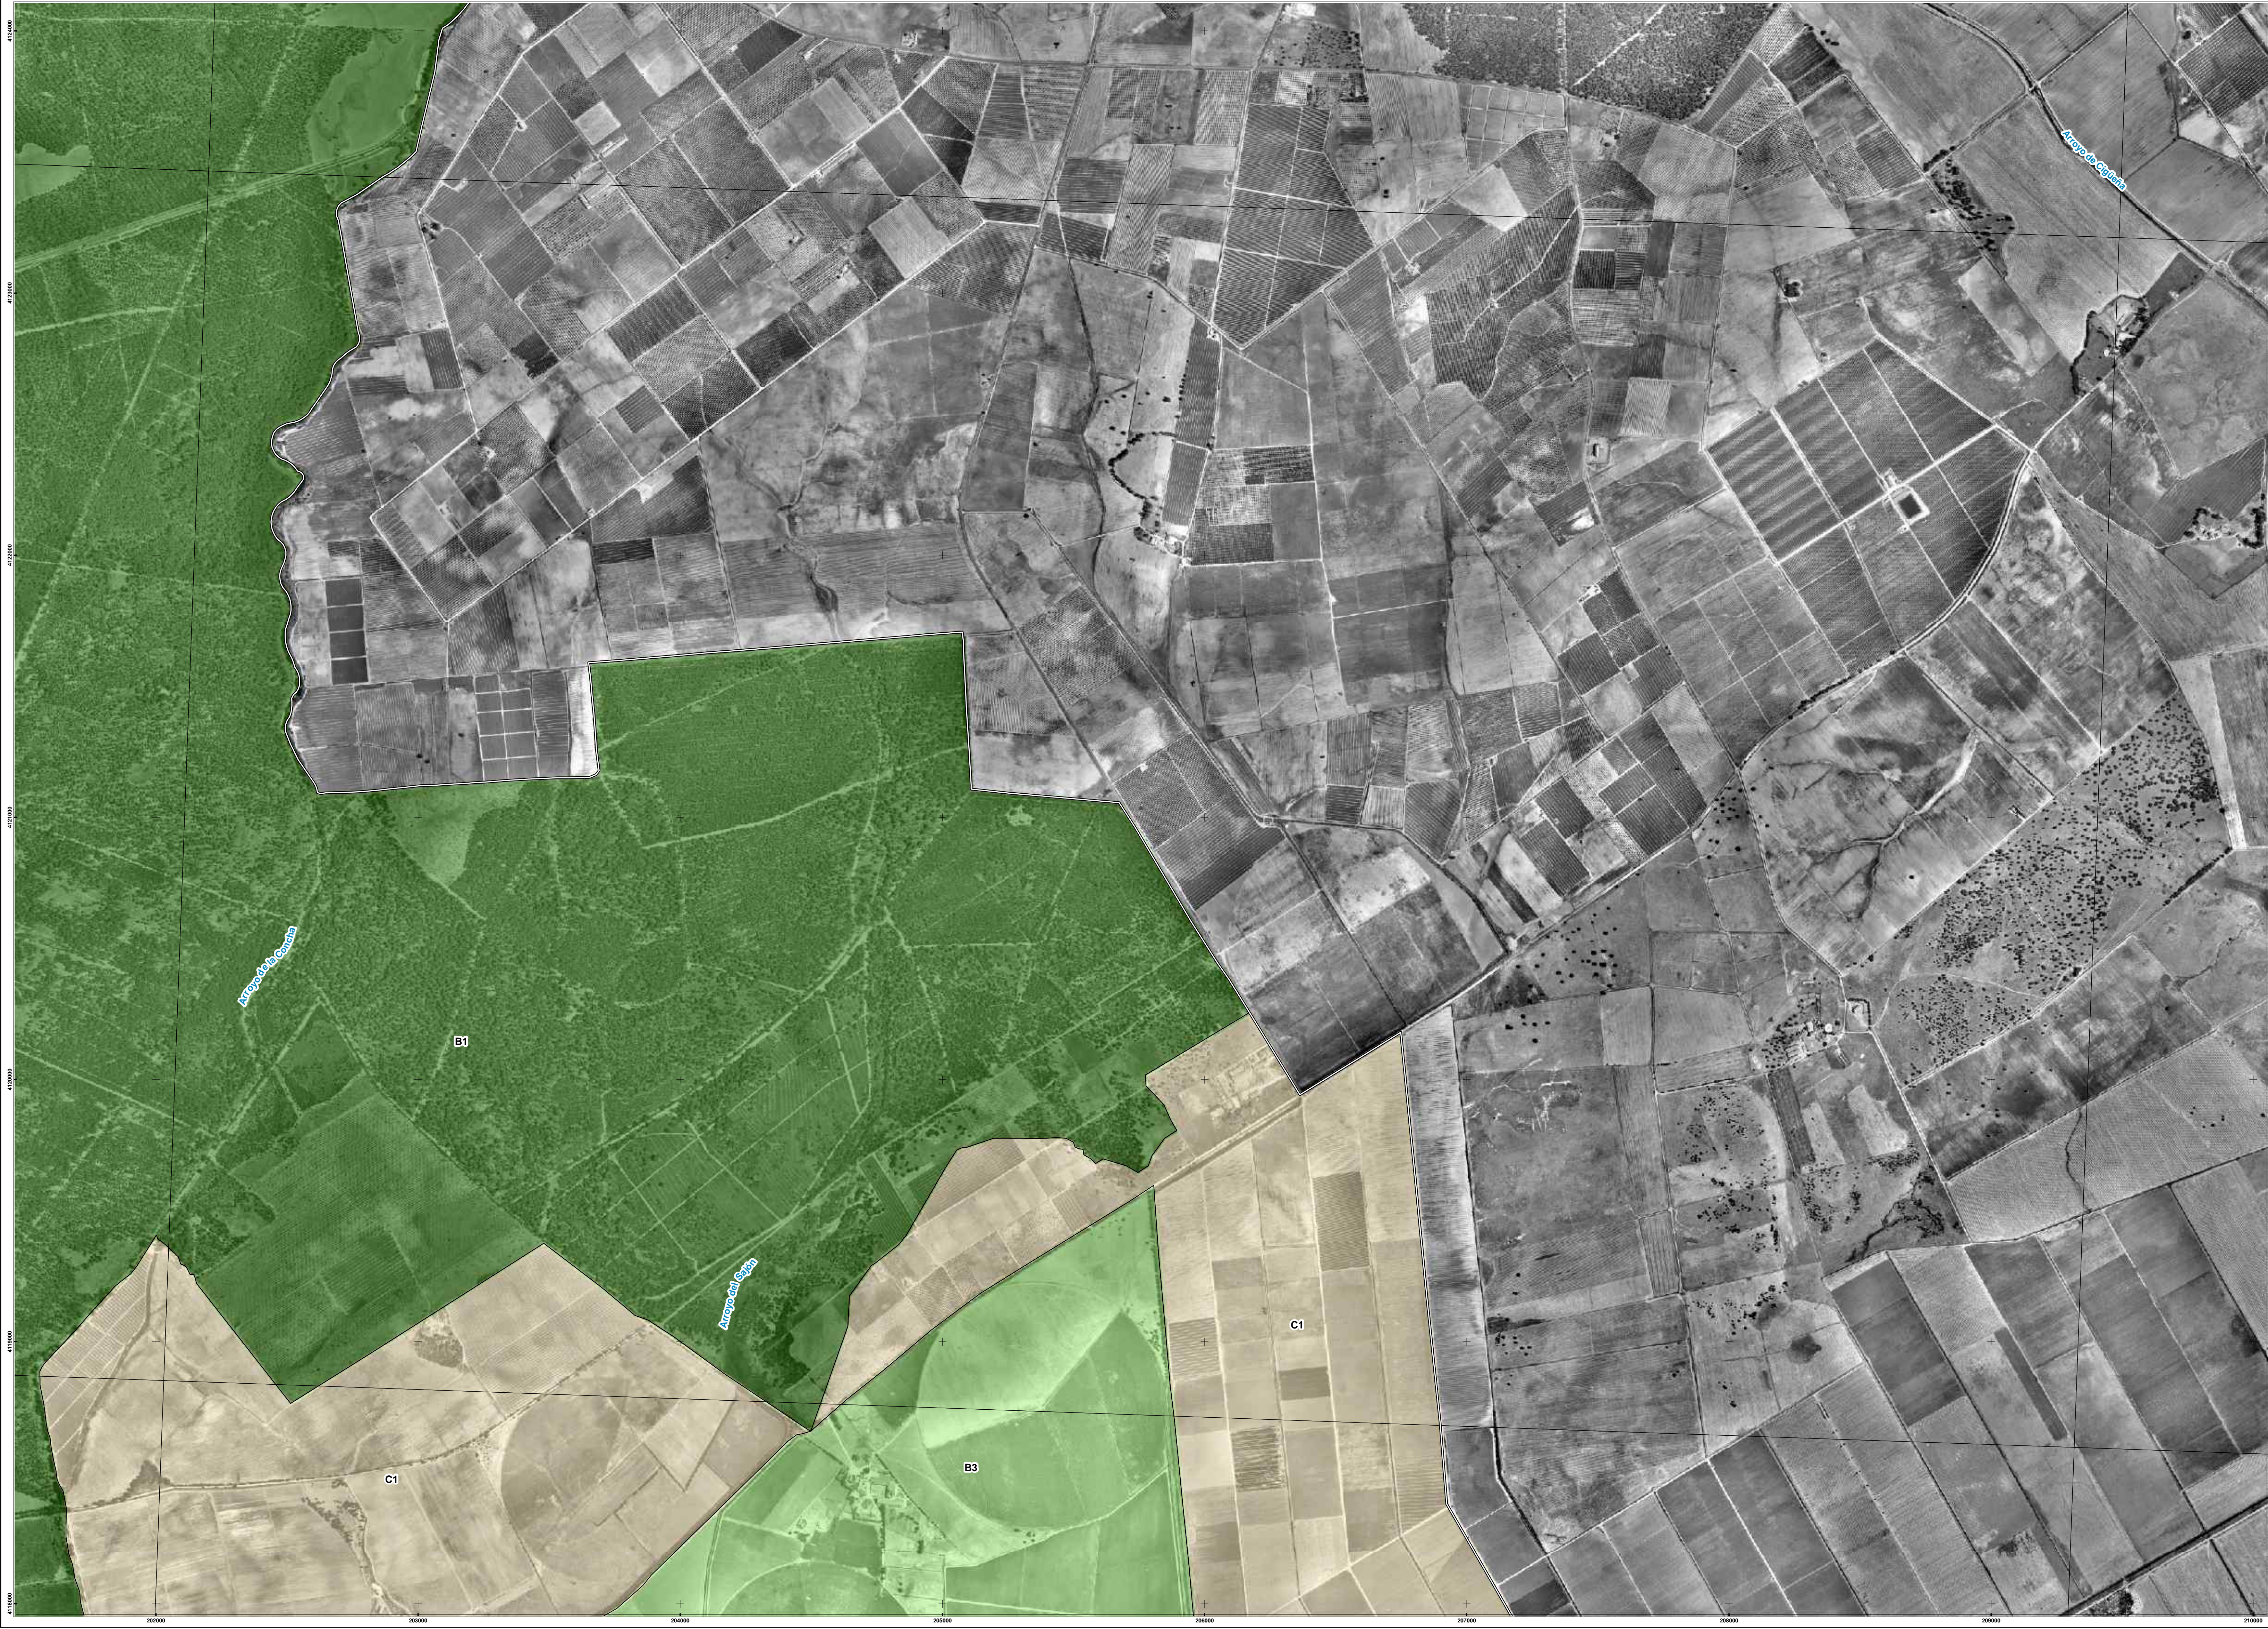

Leyenda

- Límite Parque Natural
- ZONIFICACIÓN
- A** Zonas de reserva
- Zonas de regulación especial
- B1** Terrenos de monte
- B2** Marisma no explotada
- B3** Marisma explotada
- Zonas de regulación común
- C1** Cultivos agrícolas
- C2** Áreas con edificaciones
- C3** Explotación acuícola intensiva

Mapa de localización

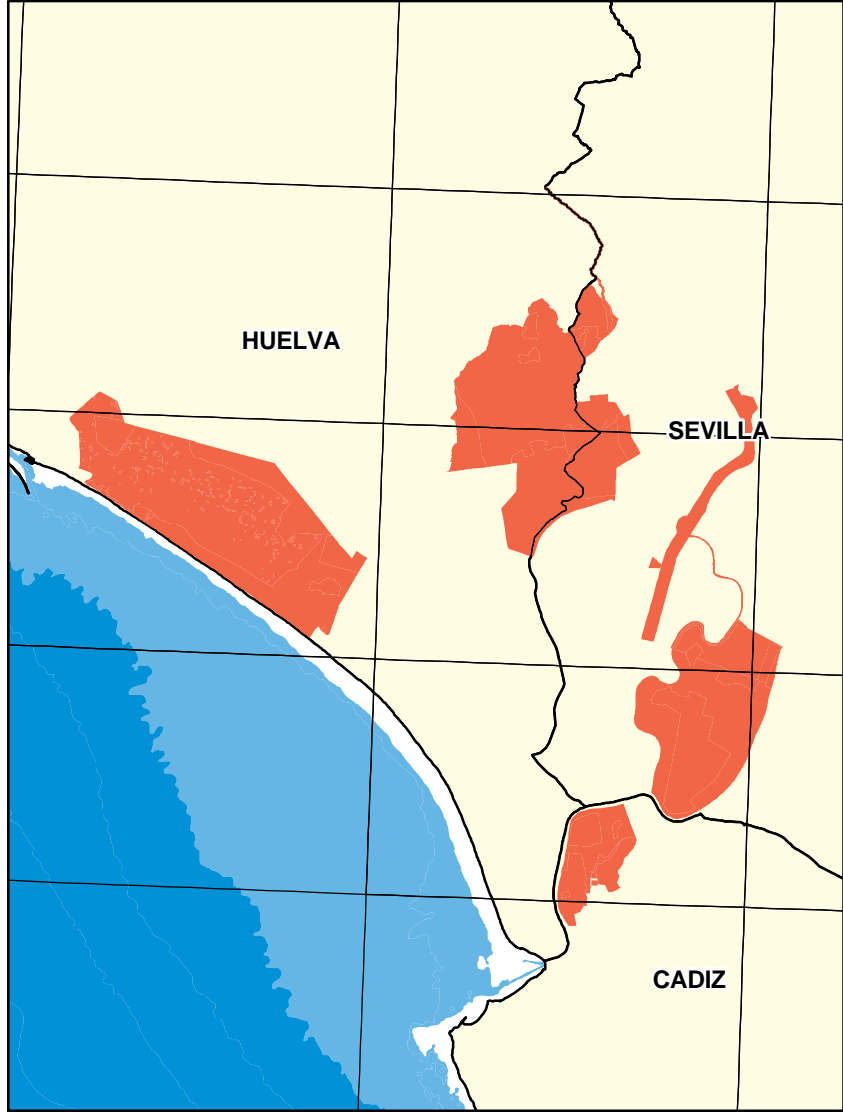

Distribución de hojas M.T.A. 1:10.000

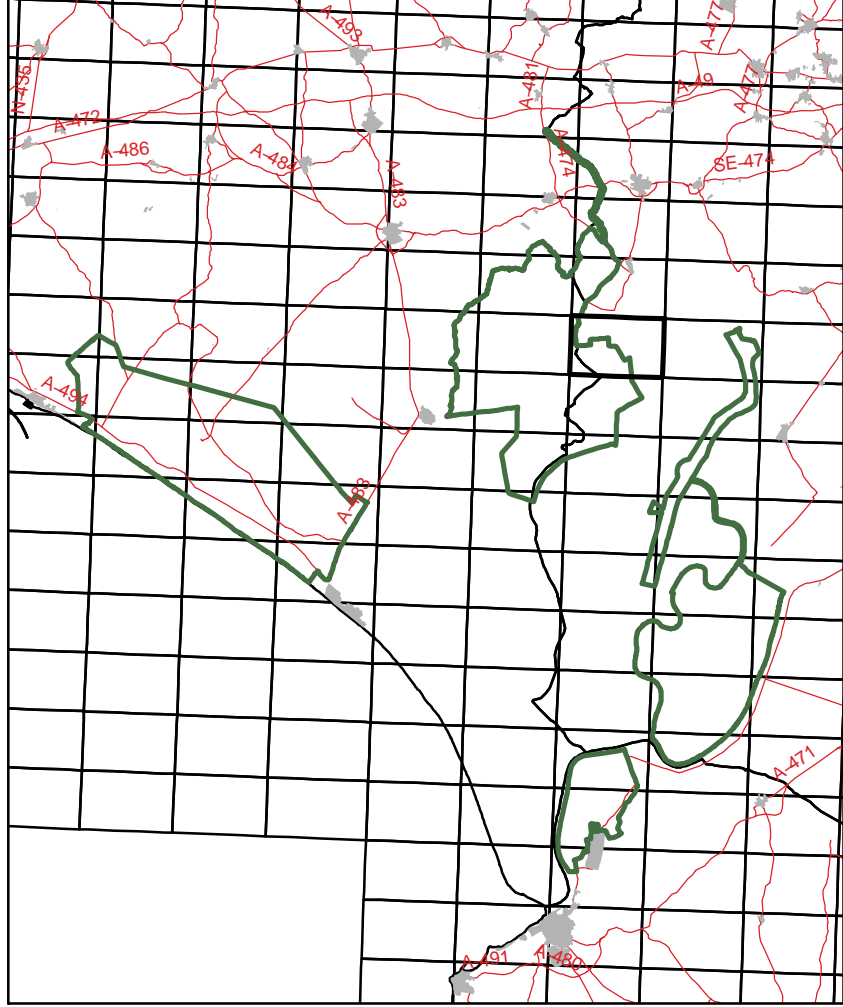

PLAN DE ORDENACIÓN DE LOS RECURSOS NATURALES DEL PARQUE NATURAL DE DOÑANA

| Límite y Zonificación                                                                                                                                                                       |  |                                                      |
|---------------------------------------------------------------------------------------------------------------------------------------------------------------------------------------------|--|------------------------------------------------------|
|                                                                                                                                                                                             |  |                                                      |
| Fuente:                                                                                                                                                                                     |  | Ortoimagen B/N<br>(Junta de Andalucía, 2.001 –2.002) |
| Escala:                                                                                                                                                                                     |  | 1:10.000 U.T.M. (huso 30)                            |
| <div> <div>100</div> <div>50</div> <div>0</div> <div>100</div> <div>200</div> <div>300</div> <div>400</div> <div>500</div> <div>600</div> <div>700</div> <div>800</div> <div>m</div> </div> |  |                                                      |
